# Supplementary material for: Alternate Bearing in Citrus: Changes in the Expression of Flowering Control Genes and in Global Gene Expression in ON- versus OFF-Crop Trees
Source: PLoS One. 2012 Oct 11;7(10):e46930. doi: 10.1371/journal.pone.0046930 (PMC3469648; doi:10.1371/journal.pone.0046930)
Supplement: Table S1 — Primers list. (XLSX) [file pone.0046930.s007.xlsx]

## Sheet: qPCR primers & probes
β ACTIN	GTCTGGTCCATCCATTGTCCA	Forward Primer
	CAATGGCCCCAACCTTAGC	Reveres Primer
CsAP1	CCGCTCTCAAACACATCAGA	Forward Primer
	TTAAGCAAGGAGGTGGCTGT	Reveres Primer
SOC1	AATGAGCGGATAGGGCAACTT	Forward Primer
	CTGAACTCTGGCAACTTTGGC	Reveres Primer
CsLFY	AATGCCCAACCAAGGTGACTA	Forward Primer
	AAAGCCCTCCTCAGTGCATTC	Reveres Primer
CiFT1	CTACCAACAAAATTTCATCACTTGAATAG	Forward Primer
	GATCTCTCTCCCTGCTAGACATATCA	Reveres Primer
	TCTTACTACTTTTGTAGGCTGTGT	dual-labeled probe
CiFT2	CAACAAAATTTCATCACTTGAATAGTC	Forward Primer
	AAACACTCAACAACACTTAGCACAAA	Reveres Primer
	AGGCTGTGTGTGCGTGTA	dual-labeled probe
CiFT3	GTGGGGATTCACAGATTCGT	Forward Primer
	GTCTCCCTCTGGCAGTTGAA	Reveres Primer
	ACACGTAAAGCAGAATGTTTGTG	dual-labeled probe
