# Supplementary material for: Alternate Bearing in Citrus: Changes in the Expression of Flowering Control Genes and in Global Gene Expression in ON- versus OFF-Crop Trees
Source: PLoS One. 2012 Oct 11;7(10):e46930. doi: 10.1371/journal.pone.0046930 (PMC3469648; doi:10.1371/journal.pone.0046930)
Supplement: Table S2 — List of genes ( http://www.phytozome.net/ ) used for nCounter analysis. (XLSX) [file pone.0046930.s008.xlsx]

## Sheet: NanoString genes
Enzyme	Gene name
Trehalose phosphate synthase (TPS)	clementine0.9_035200m.g
Trehalose phosphate phosphatase (TPP)	clementine0.9_012753m.g
Phenylalanine ammonia-lyase (PAL)	Clementine0.9_003672m.g
Chalcone synthase (CHS)	Clementine0.9_012455m.g
Cinnamate 4-hydroxylase (C4H)	Clementine0.9_009820m.g
4-coumarate:coenzyme A ligase (4CL)	Clementine0.9_006384m.g
Chalcone isomerase (CHI)	Clementine0.9_021841m.g
Flavanone 3-hydroxylase (F3H)	Clementine0.9_013829m.g
Dihydroflavonol 4-reductase (DFR)	Clementine0.9_015749m.g
isoflavone reductase (IFR)	Clementine0.9_027749m.g
Flavonol synthase (FLS)	Clementine0.9_015210m.g
UDP-glucose:flavonoid-3-O-glucosyltransferase (UF3GT)	Clementine0.9_008914m.g
Squamosa promoter-binding-like (SPL)	Clementine0.9_025342m.g
β Actin	Clementine0.9_013166m.g
polyubiquitin 2	Clementine0.9_024439m.g
cyclophilin	Clementine0.9_021992m.g
