# Supplementary material for: Alternate Bearing in Citrus: Changes in the Expression of Flowering Control Genes and in Global Gene Expression in ON- versus OFF-Crop Trees
Source: PLoS One. 2012 Oct 11;7(10):e46930. doi: 10.1371/journal.pone.0046930 (PMC3469648; doi:10.1371/journal.pone.0046930)
Supplement: Table S4 — GO annotations for differentially expressed probes in May buds. (XLSX) [file pone.0046930.s010.xlsx]

## Sheet: Bud ON May list
auxin homeostasis	Cit.30008.1.S1_at	AFFY CSV: C37_08977 /DEF=Section:11 Forward BEST NR:AAN18195.1 4e-52 At2g47750/F17A22.14 [Arabidopsis thaliana] gb|AAC63630.1| putative auxin-responsive protein [Arabidopsis thaliana] gb|AAL06947.1| At2g47750/ /REP_ORG=Citrus
	Cit.26243.1.S1_at	AFFY CSV: C37_32914 /DEF=Section:10 Reversed BEST NR:NP_194456.1 1e-41 auxin-responsive GH3 family protein [Arabidopsis thaliana] pir||T05750 auxin-regulated protein GH3 homolog M4I22.70 - Arabidopsis thaliana /REP_ORG=Citrus
	Cit.28616.1.S1_at	AFFY CSV: C37_40041 /DEF=Section:10 Reversed BEST NR:AAN18195.1 7e-86 At2g47750/F17A22.14 [Arabidopsis thaliana] gb|AAC63630.1| putative auxin-responsive protein [Arabidopsis thaliana] gb|AAL06947.1| At2g47750/ /REP_ORG=Citrus
	Cit.23036.1.S1_s_at	AFFY CSV: C37_34554 /DEF=Section:9 Reversed BEST NR:AAC61292.1 9e-30 putative auxin-regulated protein [Arabidopsis thaliana] pir||D84523 probable auxin-regulated protein [imported] - Arabidopsis thaliana ref|N /REP_ORG=Citrus
	Cit.5201.1.S1_at	AFFY CSV: C37_06583 /DEF=Section:2 Forward ESTs:5 BEST NR:AAD32141.1 1e-138 Nt-gh3 deduced protein [Nicotiana tabacum] /REP_ORG=Citrus
cellular glucan metabolic process	Cit.30513.1.S1_x_at	AFFY CSV: C37_12795 /DEF=Section:11 Forward BEST NR:BAB86890.1 1e-111 syringolide-induced protein 19-1-5 [Glycine max] /REP_ORG=Citrus
	Cit.29566.1.S1_s_at	AFFY CSV: C37_04332 /DEF=Section:11 Forward BEST NR:NP_178270.1 1e-53 invertase/pectin methylesterase inhibitor family protein [Arabidopsis thaliana] /REP_ORG=Citrus
	Cit.4211.1.S1_at	AFFY CSV: C37_05337 /DEF=Section:2 Forward ESTs:9 BEST NR:AAN28891.1 1e-104 At1g02640/T14P4_11 [Arabidopsis thaliana] ref|NP_563659.1| glycosyl hydrolase family 3 protein [Arabidopsis thaliana] gb|AAK56255.1| At1g026 /REP_ORG=Citrus
	Cit.1988.1.S1_s_at	AFFY CSV: C37_02507 /DEF=Section:2 Forward ESTs:20 BEST NR:JQ1670 1e-104 polygalacturonase (EC 3.2.1.15) 1 beta chain precursor - tomato gb|AAB39547.1| polygalacturonase isoenzyme 1 beta subunit gb|AAA34181.1| pol /REP_ORG=Citrus
	Cit.20852.1.S1_s_at	AFFY CSV: C37_45410 /DEF=Section:8 Forward BEST NR:BAB11650.1 2e-20 trehalose-6-phosphate phosphatase [Arabidopsis thaliana] /REP_ORG=Citrus
	Cit.13252.1.S1_at	AFFY CSV: C37_17558 /DEF=Section:2 Forward ESTs:6 BEST NR:AAD12577.1 1e-130 putative cellulase [Fragaria x ananassa] /REP_ORG=Citrus
	Cit.30208.1.S1_at	AFFY CSV: C37_09825 /DEF=Section:11 Forward BEST NR:AAQ17461.1 3e-90 beta-D-glucosidase [Gossypium hirsutum] /REP_ORG=Citrus
	Cit.14906.1.S1_at	AFFY CSV: C37_19780 /DEF=Section:2 Forward ESTs:2 BEST NR:NP_201319.2 2e-92 trehalose-6-phosphate phosphatase
	Cit.24193.1.S1_at	AFFY CSV: C37_40799 /DEF=Section:9 Reversed BEST NR:NP_851171.1 3e-57 trehalose-6-phosphate phosphatase (TPPA) [Arabidopsis thaliana] ref|NP_974922.1| trehalose-6-phosphate phosphatase (TPPA) [Arabidopsis thali /REP_ORG=Citrus
	Cit.24646.1.S1_s_at	AFFY CSV: C37_42080 /DEF=Section:9 Reversed BEST NR:AAM66078.1 1e-39 endo-xyloglucan transferase
	Cit.9421.1.S1_s_at	AFFY CSV: C37_12792 /DEF=Section:2 Forward ESTs:7 BEST NR:CAA10231.1 2e-92 xyloglucan endotransglycosylase 1 [Fagus sylvatica] /REP_ORG=Citrus
	Cit.25025.1.S1_s_at	AFFY CSV: C37_24646 /DEF=Section:10 Reversed BEST NR:NP_177480.1 8e-79 sucrose synthase
	Cit.14905.1.S1_s_at	AFFY CSV: C37_19779 /DEF=Section:2 Forward ESTs:2 BEST NR:NP_201319.2 5e-46 trehalose-6-phosphate phosphatase
	Cit.3554.1.S1_s_at	AFFY CSV: C37_04486 /DEF=Section:2 Forward ESTs:5 BEST NR:T07885 1e-124 cellulase (EC 3.2.1.4) - sweet orange gb|AAB65156.1| basic cellulase [Citrus sinensis] /REP_ORG=Citrus
	Cit.1136.1.S1_s_at	AFFY CSV: C37_01438 /DEF=Section:2 Forward ESTs:8 BEST NR:AAQ10000.1 1e-124 putative fructokinase 2; S2 self-incompatibility locus-linked 3.16 protein [Petunia integrifolia subsp. inflata] /REP_ORG=Citrus
	Cit.13455.1.S1_s_at	AFFY CSV: C37_17819 /DEF=Section:2 Forward ESTs:4 BEST NR:AAN87142.1 1e-110 xyloglucan endotransglycosylase precursor [Populus tremula x Populus tremuloides] /REP_ORG=Citrus
oligosaccharide biosynthetic process	Cit.20852.1.S1_s_at	AFFY CSV: C37_45410 /DEF=Section:8 Forward BEST NR:BAB11650.1 2e-20 trehalose-6-phosphate phosphatase [Arabidopsis thaliana] /REP_ORG=Citrus
	Cit.14906.1.S1_at	AFFY CSV: C37_19780 /DEF=Section:2 Forward ESTs:2 BEST NR:NP_201319.2 2e-92 trehalose-6-phosphate phosphatase
	Cit.24193.1.S1_at	AFFY CSV: C37_40799 /DEF=Section:9 Reversed BEST NR:NP_851171.1 3e-57 trehalose-6-phosphate phosphatase (TPPA) [Arabidopsis thaliana] ref|NP_974922.1| trehalose-6-phosphate phosphatase (TPPA) [Arabidopsis thali /REP_ORG=Citrus
	Cit.25025.1.S1_s_at	AFFY CSV: C37_24646 /DEF=Section:10 Reversed BEST NR:NP_177480.1 8e-79 sucrose synthase
	Cit.14905.1.S1_s_at	AFFY CSV: C37_19779 /DEF=Section:2 Forward ESTs:2 BEST NR:NP_201319.2 5e-46 trehalose-6-phosphate phosphatase
	Cit.30185.1.S1_at	AFFY CSV: C37_09750 /DEF=Section:11 Forward BEST NR:AAX16015.1 2e-57 trehalose-6-phosphate synthase [Ginkgo biloba] gb|AAX16014.1| trehalose-6-phosphate synthase [Ginkgo biloba] /REP_ORG=Citrus
glucan metabolic process	Cit.30513.1.S1_x_at	AFFY CSV: C37_12795 /DEF=Section:11 Forward BEST NR:BAB86890.1 1e-111 syringolide-induced protein 19-1-5 [Glycine max] /REP_ORG=Citrus
	Cit.29566.1.S1_s_at	AFFY CSV: C37_04332 /DEF=Section:11 Forward BEST NR:NP_178270.1 1e-53 invertase/pectin methylesterase inhibitor family protein [Arabidopsis thaliana] /REP_ORG=Citrus
	Cit.4211.1.S1_at	AFFY CSV: C37_05337 /DEF=Section:2 Forward ESTs:9 BEST NR:AAN28891.1 1e-104 At1g02640/T14P4_11 [Arabidopsis thaliana] ref|NP_563659.1| glycosyl hydrolase family 3 protein [Arabidopsis thaliana] gb|AAK56255.1| At1g026 /REP_ORG=Citrus
	Cit.1988.1.S1_s_at	AFFY CSV: C37_02507 /DEF=Section:2 Forward ESTs:20 BEST NR:JQ1670 1e-104 polygalacturonase (EC 3.2.1.15) 1 beta chain precursor - tomato gb|AAB39547.1| polygalacturonase isoenzyme 1 beta subunit gb|AAA34181.1| pol /REP_ORG=Citrus
	Cit.20852.1.S1_s_at	AFFY CSV: C37_45410 /DEF=Section:8 Forward BEST NR:BAB11650.1 2e-20 trehalose-6-phosphate phosphatase [Arabidopsis thaliana] /REP_ORG=Citrus
	Cit.13252.1.S1_at	AFFY CSV: C37_17558 /DEF=Section:2 Forward ESTs:6 BEST NR:AAD12577.1 1e-130 putative cellulase [Fragaria x ananassa] /REP_ORG=Citrus
	Cit.30208.1.S1_at	AFFY CSV: C37_09825 /DEF=Section:11 Forward BEST NR:AAQ17461.1 3e-90 beta-D-glucosidase [Gossypium hirsutum] /REP_ORG=Citrus
	Cit.14906.1.S1_at	AFFY CSV: C37_19780 /DEF=Section:2 Forward ESTs:2 BEST NR:NP_201319.2 2e-92 trehalose-6-phosphate phosphatase
	Cit.24193.1.S1_at	AFFY CSV: C37_40799 /DEF=Section:9 Reversed BEST NR:NP_851171.1 3e-57 trehalose-6-phosphate phosphatase (TPPA) [Arabidopsis thaliana] ref|NP_974922.1| trehalose-6-phosphate phosphatase (TPPA) [Arabidopsis thali /REP_ORG=Citrus
	Cit.24646.1.S1_s_at	AFFY CSV: C37_42080 /DEF=Section:9 Reversed BEST NR:AAM66078.1 1e-39 endo-xyloglucan transferase
	Cit.9421.1.S1_s_at	AFFY CSV: C37_12792 /DEF=Section:2 Forward ESTs:7 BEST NR:CAA10231.1 2e-92 xyloglucan endotransglycosylase 1 [Fagus sylvatica] /REP_ORG=Citrus
	Cit.25025.1.S1_s_at	AFFY CSV: C37_24646 /DEF=Section:10 Reversed BEST NR:NP_177480.1 8e-79 sucrose synthase
	Cit.14905.1.S1_s_at	AFFY CSV: C37_19779 /DEF=Section:2 Forward ESTs:2 BEST NR:NP_201319.2 5e-46 trehalose-6-phosphate phosphatase
	Cit.3554.1.S1_s_at	AFFY CSV: C37_04486 /DEF=Section:2 Forward ESTs:5 BEST NR:T07885 1e-124 cellulase (EC 3.2.1.4) - sweet orange gb|AAB65156.1| basic cellulase [Citrus sinensis] /REP_ORG=Citrus
	Cit.1136.1.S1_s_at	AFFY CSV: C37_01438 /DEF=Section:2 Forward ESTs:8 BEST NR:AAQ10000.1 1e-124 putative fructokinase 2; S2 self-incompatibility locus-linked 3.16 protein [Petunia integrifolia subsp. inflata] /REP_ORG=Citrus
	Cit.13455.1.S1_s_at	AFFY CSV: C37_17819 /DEF=Section:2 Forward ESTs:4 BEST NR:AAN87142.1 1e-110 xyloglucan endotransglycosylase precursor [Populus tremula x Populus tremuloides] /REP_ORG=Citrus
trehalose biosynthetic process	Cit.14906.1.S1_at	AFFY CSV: C37_19780 /DEF=Section:2 Forward ESTs:2 BEST NR:NP_201319.2 2e-92 trehalose-6-phosphate phosphatase
	Cit.24193.1.S1_at	AFFY CSV: C37_40799 /DEF=Section:9 Reversed BEST NR:NP_851171.1 3e-57 trehalose-6-phosphate phosphatase (TPPA) [Arabidopsis thaliana] ref|NP_974922.1| trehalose-6-phosphate phosphatase (TPPA) [Arabidopsis thali /REP_ORG=Citrus
	Cit.14905.1.S1_s_at	AFFY CSV: C37_19779 /DEF=Section:2 Forward ESTs:2 BEST NR:NP_201319.2 5e-46 trehalose-6-phosphate phosphatase
	Cit.30185.1.S1_at	AFFY CSV: C37_09750 /DEF=Section:11 Forward BEST NR:AAX16015.1 2e-57 trehalose-6-phosphate synthase [Ginkgo biloba] gb|AAX16014.1| trehalose-6-phosphate synthase [Ginkgo biloba] /REP_ORG=Citrus
	Cit.20852.1.S1_s_at	AFFY CSV: C37_45410 /DEF=Section:8 Forward BEST NR:BAB11650.1 2e-20 trehalose-6-phosphate phosphatase [Arabidopsis thaliana] /REP_ORG=Citrus
disaccharide biosynthetic process	Cit.20852.1.S1_s_at	AFFY CSV: C37_45410 /DEF=Section:8 Forward BEST NR:BAB11650.1 2e-20 trehalose-6-phosphate phosphatase [Arabidopsis thaliana] /REP_ORG=Citrus
	Cit.14906.1.S1_at	AFFY CSV: C37_19780 /DEF=Section:2 Forward ESTs:2 BEST NR:NP_201319.2 2e-92 trehalose-6-phosphate phosphatase
	Cit.24193.1.S1_at	AFFY CSV: C37_40799 /DEF=Section:9 Reversed BEST NR:NP_851171.1 3e-57 trehalose-6-phosphate phosphatase (TPPA) [Arabidopsis thaliana] ref|NP_974922.1| trehalose-6-phosphate phosphatase (TPPA) [Arabidopsis thali /REP_ORG=Citrus
	Cit.25025.1.S1_s_at	AFFY CSV: C37_24646 /DEF=Section:10 Reversed BEST NR:NP_177480.1 8e-79 sucrose synthase
	Cit.14905.1.S1_s_at	AFFY CSV: C37_19779 /DEF=Section:2 Forward ESTs:2 BEST NR:NP_201319.2 5e-46 trehalose-6-phosphate phosphatase
	Cit.30185.1.S1_at	AFFY CSV: C37_09750 /DEF=Section:11 Forward BEST NR:AAX16015.1 2e-57 trehalose-6-phosphate synthase [Ginkgo biloba] gb|AAX16014.1| trehalose-6-phosphate synthase [Ginkgo biloba] /REP_ORG=Citrus
cellular polysaccharide metabolic process	Cit.30513.1.S1_x_at	AFFY CSV: C37_12795 /DEF=Section:11 Forward BEST NR:BAB86890.1 1e-111 syringolide-induced protein 19-1-5 [Glycine max] /REP_ORG=Citrus
	Cit.29566.1.S1_s_at	AFFY CSV: C37_04332 /DEF=Section:11 Forward BEST NR:NP_178270.1 1e-53 invertase/pectin methylesterase inhibitor family protein [Arabidopsis thaliana] /REP_ORG=Citrus
	Cit.4211.1.S1_at	AFFY CSV: C37_05337 /DEF=Section:2 Forward ESTs:9 BEST NR:AAN28891.1 1e-104 At1g02640/T14P4_11 [Arabidopsis thaliana] ref|NP_563659.1| glycosyl hydrolase family 3 protein [Arabidopsis thaliana] gb|AAK56255.1| At1g026 /REP_ORG=Citrus
	Cit.1988.1.S1_s_at	AFFY CSV: C37_02507 /DEF=Section:2 Forward ESTs:20 BEST NR:JQ1670 1e-104 polygalacturonase (EC 3.2.1.15) 1 beta chain precursor - tomato gb|AAB39547.1| polygalacturonase isoenzyme 1 beta subunit gb|AAA34181.1| pol /REP_ORG=Citrus
	Cit.20852.1.S1_s_at	AFFY CSV: C37_45410 /DEF=Section:8 Forward BEST NR:BAB11650.1 2e-20 trehalose-6-phosphate phosphatase [Arabidopsis thaliana] /REP_ORG=Citrus
	Cit.13252.1.S1_at	AFFY CSV: C37_17558 /DEF=Section:2 Forward ESTs:6 BEST NR:AAD12577.1 1e-130 putative cellulase [Fragaria x ananassa] /REP_ORG=Citrus
	Cit.30208.1.S1_at	AFFY CSV: C37_09825 /DEF=Section:11 Forward BEST NR:AAQ17461.1 3e-90 beta-D-glucosidase [Gossypium hirsutum] /REP_ORG=Citrus
	Cit.14906.1.S1_at	AFFY CSV: C37_19780 /DEF=Section:2 Forward ESTs:2 BEST NR:NP_201319.2 2e-92 trehalose-6-phosphate phosphatase
	Cit.24193.1.S1_at	AFFY CSV: C37_40799 /DEF=Section:9 Reversed BEST NR:NP_851171.1 3e-57 trehalose-6-phosphate phosphatase (TPPA) [Arabidopsis thaliana] ref|NP_974922.1| trehalose-6-phosphate phosphatase (TPPA) [Arabidopsis thali /REP_ORG=Citrus
	Cit.24646.1.S1_s_at	AFFY CSV: C37_42080 /DEF=Section:9 Reversed BEST NR:AAM66078.1 1e-39 endo-xyloglucan transferase
	Cit.9421.1.S1_s_at	AFFY CSV: C37_12792 /DEF=Section:2 Forward ESTs:7 BEST NR:CAA10231.1 2e-92 xyloglucan endotransglycosylase 1 [Fagus sylvatica] /REP_ORG=Citrus
	Cit.25025.1.S1_s_at	AFFY CSV: C37_24646 /DEF=Section:10 Reversed BEST NR:NP_177480.1 8e-79 sucrose synthase
	Cit.14905.1.S1_s_at	AFFY CSV: C37_19779 /DEF=Section:2 Forward ESTs:2 BEST NR:NP_201319.2 5e-46 trehalose-6-phosphate phosphatase
	Cit.3554.1.S1_s_at	AFFY CSV: C37_04486 /DEF=Section:2 Forward ESTs:5 BEST NR:T07885 1e-124 cellulase (EC 3.2.1.4) - sweet orange gb|AAB65156.1| basic cellulase [Citrus sinensis] /REP_ORG=Citrus
	Cit.1136.1.S1_s_at	AFFY CSV: C37_01438 /DEF=Section:2 Forward ESTs:8 BEST NR:AAQ10000.1 1e-124 putative fructokinase 2; S2 self-incompatibility locus-linked 3.16 protein [Petunia integrifolia subsp. inflata] /REP_ORG=Citrus
	Cit.13455.1.S1_s_at	AFFY CSV: C37_17819 /DEF=Section:2 Forward ESTs:4 BEST NR:AAN87142.1 1e-110 xyloglucan endotransglycosylase precursor [Populus tremula x Populus tremuloides] /REP_ORG=Citrus
polysaccharide metabolic process	Cit.302.1.S1_s_at	AFFY CSV: C37_00373 /DEF=Section:2 Forward ESTs:3 BEST NR:S72528 1e-112 chitinase (EC 3.2.1.14) class II precursor - upland cotton emb|CAA92277.1| chitinase [Gossypium hirsutum] /REP_ORG=Citrus
	Cit.30513.1.S1_x_at	AFFY CSV: C37_12795 /DEF=Section:11 Forward BEST NR:BAB86890.1 1e-111 syringolide-induced protein 19-1-5 [Glycine max] /REP_ORG=Citrus
	Cit.29566.1.S1_s_at	AFFY CSV: C37_04332 /DEF=Section:11 Forward BEST NR:NP_178270.1 1e-53 invertase/pectin methylesterase inhibitor family protein [Arabidopsis thaliana] /REP_ORG=Citrus
	Cit.4211.1.S1_at	AFFY CSV: C37_05337 /DEF=Section:2 Forward ESTs:9 BEST NR:AAN28891.1 1e-104 At1g02640/T14P4_11 [Arabidopsis thaliana] ref|NP_563659.1| glycosyl hydrolase family 3 protein [Arabidopsis thaliana] gb|AAK56255.1| At1g026 /REP_ORG=Citrus
	Cit.1988.1.S1_s_at	AFFY CSV: C37_02507 /DEF=Section:2 Forward ESTs:20 BEST NR:JQ1670 1e-104 polygalacturonase (EC 3.2.1.15) 1 beta chain precursor - tomato gb|AAB39547.1| polygalacturonase isoenzyme 1 beta subunit gb|AAA34181.1| pol /REP_ORG=Citrus
	Cit.24193.1.S1_at	AFFY CSV: C37_40799 /DEF=Section:9 Reversed BEST NR:NP_851171.1 3e-57 trehalose-6-phosphate phosphatase (TPPA) [Arabidopsis thaliana] ref|NP_974922.1| trehalose-6-phosphate phosphatase (TPPA) [Arabidopsis thali /REP_ORG=Citrus
	Cit.13252.1.S1_at	AFFY CSV: C37_17558 /DEF=Section:2 Forward ESTs:6 BEST NR:AAD12577.1 1e-130 putative cellulase [Fragaria x ananassa] /REP_ORG=Citrus
	Cit.20852.1.S1_s_at	AFFY CSV: C37_45410 /DEF=Section:8 Forward BEST NR:BAB11650.1 2e-20 trehalose-6-phosphate phosphatase [Arabidopsis thaliana] /REP_ORG=Citrus
	Cit.30208.1.S1_at	AFFY CSV: C37_09825 /DEF=Section:11 Forward BEST NR:AAQ17461.1 3e-90 beta-D-glucosidase [Gossypium hirsutum] /REP_ORG=Citrus
	Cit.14906.1.S1_at	AFFY CSV: C37_19780 /DEF=Section:2 Forward ESTs:2 BEST NR:NP_201319.2 2e-92 trehalose-6-phosphate phosphatase
	Cit.20412.1.S1_s_at	AFFY CSV: C37_42165 /DEF=Section:8 Forward BEST NR:CAA92277.1 2e-27 chitinase [Gossypium hirsutum] pir||S72528 chitinase (EC 3.2.1.14) class II precursor - upland cotton /REP_ORG=Citrus
	Cit.24646.1.S1_s_at	AFFY CSV: C37_42080 /DEF=Section:9 Reversed BEST NR:AAM66078.1 1e-39 endo-xyloglucan transferase
	Cit.9421.1.S1_s_at	AFFY CSV: C37_12792 /DEF=Section:2 Forward ESTs:7 BEST NR:CAA10231.1 2e-92 xyloglucan endotransglycosylase 1 [Fagus sylvatica] /REP_ORG=Citrus
	Cit.25025.1.S1_s_at	AFFY CSV: C37_24646 /DEF=Section:10 Reversed BEST NR:NP_177480.1 8e-79 sucrose synthase
	Cit.14905.1.S1_s_at	AFFY CSV: C37_19779 /DEF=Section:2 Forward ESTs:2 BEST NR:NP_201319.2 5e-46 trehalose-6-phosphate phosphatase
	Cit.3554.1.S1_s_at	AFFY CSV: C37_04486 /DEF=Section:2 Forward ESTs:5 BEST NR:T07885 1e-124 cellulase (EC 3.2.1.4) - sweet orange gb|AAB65156.1| basic cellulase [Citrus sinensis] /REP_ORG=Citrus
	Cit.1136.1.S1_s_at	AFFY CSV: C37_01438 /DEF=Section:2 Forward ESTs:8 BEST NR:AAQ10000.1 1e-124 putative fructokinase 2; S2 self-incompatibility locus-linked 3.16 protein [Petunia integrifolia subsp. inflata] /REP_ORG=Citrus
	Cit.13455.1.S1_s_at	AFFY CSV: C37_17819 /DEF=Section:2 Forward ESTs:4 BEST NR:AAN87142.1 1e-110 xyloglucan endotransglycosylase precursor [Populus tremula x Populus tremuloides] /REP_ORG=Citrus
trehalose metabolic process	Cit.14906.1.S1_at	AFFY CSV: C37_19780 /DEF=Section:2 Forward ESTs:2 BEST NR:NP_201319.2 2e-92 trehalose-6-phosphate phosphatase
	Cit.24193.1.S1_at	AFFY CSV: C37_40799 /DEF=Section:9 Reversed BEST NR:NP_851171.1 3e-57 trehalose-6-phosphate phosphatase (TPPA) [Arabidopsis thaliana] ref|NP_974922.1| trehalose-6-phosphate phosphatase (TPPA) [Arabidopsis thali /REP_ORG=Citrus
	Cit.14905.1.S1_s_at	AFFY CSV: C37_19779 /DEF=Section:2 Forward ESTs:2 BEST NR:NP_201319.2 5e-46 trehalose-6-phosphate phosphatase
	Cit.30185.1.S1_at	AFFY CSV: C37_09750 /DEF=Section:11 Forward BEST NR:AAX16015.1 2e-57 trehalose-6-phosphate synthase [Ginkgo biloba] gb|AAX16014.1| trehalose-6-phosphate synthase [Ginkgo biloba] /REP_ORG=Citrus
	Cit.20852.1.S1_s_at	AFFY CSV: C37_45410 /DEF=Section:8 Forward BEST NR:BAB11650.1 2e-20 trehalose-6-phosphate phosphatase [Arabidopsis thaliana] /REP_ORG=Citrus
disaccharide metabolic process	Cit.29566.1.S1_s_at	AFFY CSV: C37_04332 /DEF=Section:11 Forward BEST NR:NP_178270.1 1e-53 invertase/pectin methylesterase inhibitor family protein [Arabidopsis thaliana] /REP_ORG=Citrus
	Cit.4211.1.S1_at	AFFY CSV: C37_05337 /DEF=Section:2 Forward ESTs:9 BEST NR:AAN28891.1 1e-104 At1g02640/T14P4_11 [Arabidopsis thaliana] ref|NP_563659.1| glycosyl hydrolase family 3 protein [Arabidopsis thaliana] gb|AAK56255.1| At1g026 /REP_ORG=Citrus
	Cit.1988.1.S1_s_at	AFFY CSV: C37_02507 /DEF=Section:2 Forward ESTs:20 BEST NR:JQ1670 1e-104 polygalacturonase (EC 3.2.1.15) 1 beta chain precursor - tomato gb|AAB39547.1| polygalacturonase isoenzyme 1 beta subunit gb|AAA34181.1| pol /REP_ORG=Citrus
	Cit.20852.1.S1_s_at	AFFY CSV: C37_45410 /DEF=Section:8 Forward BEST NR:BAB11650.1 2e-20 trehalose-6-phosphate phosphatase [Arabidopsis thaliana] /REP_ORG=Citrus
	Cit.13252.1.S1_at	AFFY CSV: C37_17558 /DEF=Section:2 Forward ESTs:6 BEST NR:AAD12577.1 1e-130 putative cellulase [Fragaria x ananassa] /REP_ORG=Citrus
	Cit.30208.1.S1_at	AFFY CSV: C37_09825 /DEF=Section:11 Forward BEST NR:AAQ17461.1 3e-90 beta-D-glucosidase [Gossypium hirsutum] /REP_ORG=Citrus
	Cit.14906.1.S1_at	AFFY CSV: C37_19780 /DEF=Section:2 Forward ESTs:2 BEST NR:NP_201319.2 2e-92 trehalose-6-phosphate phosphatase
	Cit.24193.1.S1_at	AFFY CSV: C37_40799 /DEF=Section:9 Reversed BEST NR:NP_851171.1 3e-57 trehalose-6-phosphate phosphatase (TPPA) [Arabidopsis thaliana] ref|NP_974922.1| trehalose-6-phosphate phosphatase (TPPA) [Arabidopsis thali /REP_ORG=Citrus
	Cit.25025.1.S1_s_at	AFFY CSV: C37_24646 /DEF=Section:10 Reversed BEST NR:NP_177480.1 8e-79 sucrose synthase
	Cit.14905.1.S1_s_at	AFFY CSV: C37_19779 /DEF=Section:2 Forward ESTs:2 BEST NR:NP_201319.2 5e-46 trehalose-6-phosphate phosphatase
	Cit.3554.1.S1_s_at	AFFY CSV: C37_04486 /DEF=Section:2 Forward ESTs:5 BEST NR:T07885 1e-124 cellulase (EC 3.2.1.4) - sweet orange gb|AAB65156.1| basic cellulase [Citrus sinensis] /REP_ORG=Citrus
	Cit.30185.1.S1_at	AFFY CSV: C37_09750 /DEF=Section:11 Forward BEST NR:AAX16015.1 2e-57 trehalose-6-phosphate synthase [Ginkgo biloba] gb|AAX16014.1| trehalose-6-phosphate synthase [Ginkgo biloba] /REP_ORG=Citrus
	Cit.1136.1.S1_s_at	AFFY CSV: C37_01438 /DEF=Section:2 Forward ESTs:8 BEST NR:AAQ10000.1 1e-124 putative fructokinase 2; S2 self-incompatibility locus-linked 3.16 protein [Petunia integrifolia subsp. inflata] /REP_ORG=Citrus
oligosaccharide metabolic process	Cit.29566.1.S1_s_at	AFFY CSV: C37_04332 /DEF=Section:11 Forward BEST NR:NP_178270.1 1e-53 invertase/pectin methylesterase inhibitor family protein [Arabidopsis thaliana] /REP_ORG=Citrus
	Cit.4211.1.S1_at	AFFY CSV: C37_05337 /DEF=Section:2 Forward ESTs:9 BEST NR:AAN28891.1 1e-104 At1g02640/T14P4_11 [Arabidopsis thaliana] ref|NP_563659.1| glycosyl hydrolase family 3 protein [Arabidopsis thaliana] gb|AAK56255.1| At1g026 /REP_ORG=Citrus
	Cit.1988.1.S1_s_at	AFFY CSV: C37_02507 /DEF=Section:2 Forward ESTs:20 BEST NR:JQ1670 1e-104 polygalacturonase (EC 3.2.1.15) 1 beta chain precursor - tomato gb|AAB39547.1| polygalacturonase isoenzyme 1 beta subunit gb|AAA34181.1| pol /REP_ORG=Citrus
	Cit.20852.1.S1_s_at	AFFY CSV: C37_45410 /DEF=Section:8 Forward BEST NR:BAB11650.1 2e-20 trehalose-6-phosphate phosphatase [Arabidopsis thaliana] /REP_ORG=Citrus
	Cit.13252.1.S1_at	AFFY CSV: C37_17558 /DEF=Section:2 Forward ESTs:6 BEST NR:AAD12577.1 1e-130 putative cellulase [Fragaria x ananassa] /REP_ORG=Citrus
	Cit.30208.1.S1_at	AFFY CSV: C37_09825 /DEF=Section:11 Forward BEST NR:AAQ17461.1 3e-90 beta-D-glucosidase [Gossypium hirsutum] /REP_ORG=Citrus
	Cit.14906.1.S1_at	AFFY CSV: C37_19780 /DEF=Section:2 Forward ESTs:2 BEST NR:NP_201319.2 2e-92 trehalose-6-phosphate phosphatase
	Cit.24193.1.S1_at	AFFY CSV: C37_40799 /DEF=Section:9 Reversed BEST NR:NP_851171.1 3e-57 trehalose-6-phosphate phosphatase (TPPA) [Arabidopsis thaliana] ref|NP_974922.1| trehalose-6-phosphate phosphatase (TPPA) [Arabidopsis thali /REP_ORG=Citrus
	Cit.25025.1.S1_s_at	AFFY CSV: C37_24646 /DEF=Section:10 Reversed BEST NR:NP_177480.1 8e-79 sucrose synthase
	Cit.14905.1.S1_s_at	AFFY CSV: C37_19779 /DEF=Section:2 Forward ESTs:2 BEST NR:NP_201319.2 5e-46 trehalose-6-phosphate phosphatase
	Cit.3554.1.S1_s_at	AFFY CSV: C37_04486 /DEF=Section:2 Forward ESTs:5 BEST NR:T07885 1e-124 cellulase (EC 3.2.1.4) - sweet orange gb|AAB65156.1| basic cellulase [Citrus sinensis] /REP_ORG=Citrus
	Cit.30185.1.S1_at	AFFY CSV: C37_09750 /DEF=Section:11 Forward BEST NR:AAX16015.1 2e-57 trehalose-6-phosphate synthase [Ginkgo biloba] gb|AAX16014.1| trehalose-6-phosphate synthase [Ginkgo biloba] /REP_ORG=Citrus
	Cit.1136.1.S1_s_at	AFFY CSV: C37_01438 /DEF=Section:2 Forward ESTs:8 BEST NR:AAQ10000.1 1e-124 putative fructokinase 2; S2 self-incompatibility locus-linked 3.16 protein [Petunia integrifolia subsp. inflata] /REP_ORG=Citrus
response to chemical stimulus	Cit.13519.1.S1_at	AFFY CSV: C37_17895 /DEF=Section:2 Forward ESTs:6 BEST NR:AAU04404.1 4e-69 putative WRKY transcription factor 40 [Citrus limon] /REP_ORG=Citrus
	Cit.29007.1.S1_at	AFFY CSV: C37_42150 /DEF=Section:10 Reversed BEST NR:S71371 4e-35 gibberellin-regulated protein GASA5 precursor - Arabidopsis thaliana gb|AAA98520.1| GASA5 /REP_ORG=Citrus
	Cit.14250.1.S1_at	AFFY CSV: C37_18863 /DEF=Section:2 Forward ESTs:5 BEST NR:AAL16234.1 2e-84 At1g04040/F21M11_2 [Arabidopsis thaliana] gb|AAK49578.1| Similar to acid phosphatase [Arabidopsis thaliana] pir||F86171 hypothetical protein /REP_ORG=Citrus
	Cit.28616.1.S1_at	AFFY CSV: C37_40041 /DEF=Section:10 Reversed BEST NR:AAN18195.1 7e-86 At2g47750/F17A22.14 [Arabidopsis thaliana] gb|AAC63630.1| putative auxin-responsive protein [Arabidopsis thaliana] gb|AAL06947.1| At2g47750/ /REP_ORG=Citrus
	Cit.30448.1.S1_s_at	AFFY CSV: C37_11695 /DEF=Section:11 Forward BEST NR:T07161 5e-22 late-embryogenesis protein homolog - tomato gb|AAA86424.1| heat shock protein gb|AAA34193.1| ORF /REP_ORG=Citrus
	Cit.5201.1.S1_at	AFFY CSV: C37_06583 /DEF=Section:2 Forward ESTs:5 BEST NR:AAD32141.1 1e-138 Nt-gh3 deduced protein [Nicotiana tabacum] /REP_ORG=Citrus
	Cit.5497.1.S1_at	AFFY CSV: C37_06995 /DEF=Section:2 Forward ESTs:5 BEST NR:AAL35365.1 1e-113 ascorbate peroxidase [Capsicum annuum] /REP_ORG=Citrus
	Cit.35768.1.S1_s_at	AFFY CSV: C37_29319 /DEF=Section:12 Forward BEST NR:T51963 2e-23 GASA5-like protein [imported] - Picea mariana gb|AAC32128.1| GASA5-like protein [Picea mariana] /REP_ORG=Citrus
	Cit.9130.1.S1_s_at	AFFY CSV: C37_12441 /DEF=Section:2 Forward ESTs:10 BEST NR:AAF26142.1 3e-35 unknown protein [Arabidopsis thaliana] ref|NP_187206.1| hypoxia-responsive family protein [Arabidopsis thaliana] /REP_ORG=Citrus
	Cit.4865.1.S1_s_at	AFFY CSV: C37_06164 /DEF=Section:2 Forward ESTs:4 BEST NR:AAM91167.1 7e-47 putative myosin heavy chain [Arabidopsis thaliana] gb|AAM13080.1| putative myosin heavy chain [Arabidopsis thaliana] gb|AAL09731.1| At2g3224 /REP_ORG=Citrus
	Cit.18244.1.S1_at	AFFY CSV: C37_21719 /DEF=Section:3 Forward ESTs:2 BEST NR:NP_173683.1 2e-26 gibberellin-responsive protein
	Cit.11068.1.S1_at	AFFY CSV: C37_14827 /DEF=Section:2 Forward ESTs:19 BEST NR:BAD01556.1 6e-47 ERF-like protein [Cucumis melo] /REP_ORG=Citrus
	Cit.21700.1.S1_at	AFFY CSV: C37_26713 /DEF=Section:9 Reversed BEST NR:CAB43438.1 3e-41 putative protein [Arabidopsis thaliana] gb|AAF09479.1| phytoalexin-deficient 4 protein [Arabidopsis thaliana] pir||T08456 hypothetical prote /REP_ORG=Citrus
	Cit.23036.1.S1_s_at	AFFY CSV: C37_34554 /DEF=Section:9 Reversed BEST NR:AAC61292.1 9e-30 putative auxin-regulated protein [Arabidopsis thaliana] pir||D84523 probable auxin-regulated protein [imported] - Arabidopsis thaliana ref|N /REP_ORG=Citrus
	Cit.20065.1.S1_at	AFFY CSV: C37_30545 /DEF=Section:8 Forward BEST NR:AAR11300.1 5e-54 lectin-like receptor kinase 7;3 [Medicago truncatula] /REP_ORG=Citrus
	Cit.13455.1.S1_s_at	AFFY CSV: C37_17819 /DEF=Section:2 Forward ESTs:4 BEST NR:AAN87142.1 1e-110 xyloglucan endotransglycosylase precursor [Populus tremula x Populus tremuloides] /REP_ORG=Citrus
	Cit.12961.1.S1_s_at	AFFY CSV: C37_17197 /DEF=Section:2 Forward ESTs:3 BEST NR:BAB02355.1 6e-65 unnamed protein product [Arabidopsis thaliana] ref|NP_188797.1| senescence/dehydration-associated protein-related [Arabidopsis thaliana] /REP_ORG=Citrus
	Cit.23268.1.S1_s_at	AFFY CSV: C37_37161 /DEF=Section:9 Reversed BEST NR:AAD43561.1 2e-58 bacterial-induced peroxidase precursor [Gossypium hirsutum] /REP_ORG=Citrus
	Cit.38568.1.S1_at	AFFY CSV: C37_44507 /DEF=Section:12 Forward BEST NR:AAL47444.1 6e-34 AT5g54510/F24B18_13 [Arabidopsis thaliana] /REP_ORG=Citrus
	Cit.30166.1.S1_at	AFFY CSV: C37_09664 /DEF=Section:11 Forward BEST NR:AAU95435.1 8e-57 At2g29410 [Arabidopsis thaliana] gb|AAT70445.1| At2g29410 [Arabidopsis thaliana] ref|NP_180502.2| zinc transporter
	Cit.17149.1.S1_s_at	AFFY CSV: C37_04196 /DEF=Section:3 Forward ESTs:3 BEST NR:AAD03576.1 5e-18 putative histidine kinase [Arabidopsis thaliana] pir||T00842 probable histidine kinase [imported] - Arabidopsis thaliana /REP_ORG=Citrus
	Cit.7653.1.S1_at	AFFY CSV: C37_10416 /DEF=Section:2 Forward ESTs:2 BEST NR:AAO85438.1 1e-106 putative transporter NIC3 [Arabidopsis thaliana] dbj|BAB10095.1| unnamed protein product [Arabidopsis thaliana] ref|NP_199724.1| MATE efflux /REP_ORG=Citrus
	Cit.4865.1.S1_at	AFFY CSV: C37_06164 /DEF=Section:2 Forward ESTs:4 BEST NR:AAM91167.1 7e-47 putative myosin heavy chain [Arabidopsis thaliana] gb|AAM13080.1| putative myosin heavy chain [Arabidopsis thaliana] gb|AAL09731.1| At2g3224 /REP_ORG=Citrus
	Cit.26243.1.S1_at	AFFY CSV: C37_32914 /DEF=Section:10 Reversed BEST NR:NP_194456.1 1e-41 auxin-responsive GH3 family protein [Arabidopsis thaliana] pir||T05750 auxin-regulated protein GH3 homolog M4I22.70 - Arabidopsis thaliana /REP_ORG=Citrus
	Cit.12697.1.S1_at	AFFY CSV: C37_16875 /DEF=Section:2 Forward ESTs:10 BEST NR:NP_173866.1 6e-23 polcalcin
	Cit.25025.1.S1_s_at	AFFY CSV: C37_24646 /DEF=Section:10 Reversed BEST NR:NP_177480.1 8e-79 sucrose synthase
	Cit.22861.1.S1_at	AFFY CSV: C37_33684 /DEF=Section:9 Reversed BEST NR:BAB86892.1 9e-35 syringolide-induced protein 1-3-1A [Glycine max] /REP_ORG=Citrus
	Cit.35499.1.S1_at	AFFY CSV: C37_28829 /DEF=Section:12 Forward BEST NR:NP_193993.1 2e-42 auxin-responsive family protein [Arabidopsis thaliana] pir||T04557 hypothetical protein T12H17.10 - Arabidopsis thaliana /REP_ORG=Citrus
	Cit.34418.1.S1_at	AFFY CSV: C37_27158 /DEF=Section:12 Forward BEST NR:T07122 4e-21 calmodulin CAM5 - soybean gb|AAA33948.1| calmodulin prf||2121384E calmodulin /REP_ORG=Citrus
	Cit.5743.1.S1_s_at	AFFY CSV: C37_07336 /DEF=Section:2 Forward ESTs:2 BEST NR:AAD11484.1 3e-44 peroxidase [Glycine max] /REP_ORG=Citrus
	Cit.17514.1.S1_at	AFFY CSV: C37_10127 /DEF=Section:3 Forward ESTs:2 BEST NR:NP_181810.2 4e-60 abscisic acid-responsive HVA22 family protein [Arabidopsis thaliana] dbj|BAD43160.1| unnamed protein product [Arabidopsis thaliana] /REP_ORG=Citrus
	Cit.12961.1.S1_at	AFFY CSV: C37_17197 /DEF=Section:2 Forward ESTs:3 BEST NR:BAB02355.1 6e-65 unnamed protein product [Arabidopsis thaliana] ref|NP_188797.1| senescence/dehydration-associated protein-related [Arabidopsis thaliana] /REP_ORG=Citrus
	Cit.38637.1.S1_at	AFFY CSV: C37_44579 /DEF=Section:12 Forward BEST NR:T06437 2e-37 calmodulin - garden pea gb|AAA92677.1| calmodulin-like protein /REP_ORG=Citrus
	Cit.30008.1.S1_at	AFFY CSV: C37_08977 /DEF=Section:11 Forward BEST NR:AAN18195.1 4e-52 At2g47750/F17A22.14 [Arabidopsis thaliana] gb|AAC63630.1| putative auxin-responsive protein [Arabidopsis thaliana] gb|AAL06947.1| At2g47750/ /REP_ORG=Citrus
	Cit.10816.1.S1_at	AFFY CSV: C37_14517 /DEF=Section:2 Forward ESTs:25 BEST NR:AAR37421.1 8e-35 putative WRKY4 transcription factor [Vitis aestivalis] /REP_ORG=Citrus
glycoside metabolic process	Cit.29566.1.S1_s_at	AFFY CSV: C37_04332 /DEF=Section:11 Forward BEST NR:NP_178270.1 1e-53 invertase/pectin methylesterase inhibitor family protein [Arabidopsis thaliana] /REP_ORG=Citrus
	Cit.4211.1.S1_at	AFFY CSV: C37_05337 /DEF=Section:2 Forward ESTs:9 BEST NR:AAN28891.1 1e-104 At1g02640/T14P4_11 [Arabidopsis thaliana] ref|NP_563659.1| glycosyl hydrolase family 3 protein [Arabidopsis thaliana] gb|AAK56255.1| At1g026 /REP_ORG=Citrus
	Cit.1988.1.S1_s_at	AFFY CSV: C37_02507 /DEF=Section:2 Forward ESTs:20 BEST NR:JQ1670 1e-104 polygalacturonase (EC 3.2.1.15) 1 beta chain precursor - tomato gb|AAB39547.1| polygalacturonase isoenzyme 1 beta subunit gb|AAA34181.1| pol /REP_ORG=Citrus
	Cit.20852.1.S1_s_at	AFFY CSV: C37_45410 /DEF=Section:8 Forward BEST NR:BAB11650.1 2e-20 trehalose-6-phosphate phosphatase [Arabidopsis thaliana] /REP_ORG=Citrus
	Cit.13252.1.S1_at	AFFY CSV: C37_17558 /DEF=Section:2 Forward ESTs:6 BEST NR:AAD12577.1 1e-130 putative cellulase [Fragaria x ananassa] /REP_ORG=Citrus
	Cit.30208.1.S1_at	AFFY CSV: C37_09825 /DEF=Section:11 Forward BEST NR:AAQ17461.1 3e-90 beta-D-glucosidase [Gossypium hirsutum] /REP_ORG=Citrus
	Cit.14906.1.S1_at	AFFY CSV: C37_19780 /DEF=Section:2 Forward ESTs:2 BEST NR:NP_201319.2 2e-92 trehalose-6-phosphate phosphatase
	Cit.24193.1.S1_at	AFFY CSV: C37_40799 /DEF=Section:9 Reversed BEST NR:NP_851171.1 3e-57 trehalose-6-phosphate phosphatase (TPPA) [Arabidopsis thaliana] ref|NP_974922.1| trehalose-6-phosphate phosphatase (TPPA) [Arabidopsis thali /REP_ORG=Citrus
	Cit.25025.1.S1_s_at	AFFY CSV: C37_24646 /DEF=Section:10 Reversed BEST NR:NP_177480.1 8e-79 sucrose synthase
	Cit.14905.1.S1_s_at	AFFY CSV: C37_19779 /DEF=Section:2 Forward ESTs:2 BEST NR:NP_201319.2 5e-46 trehalose-6-phosphate phosphatase
	Cit.3554.1.S1_s_at	AFFY CSV: C37_04486 /DEF=Section:2 Forward ESTs:5 BEST NR:T07885 1e-124 cellulase (EC 3.2.1.4) - sweet orange gb|AAB65156.1| basic cellulase [Citrus sinensis] /REP_ORG=Citrus
	Cit.30185.1.S1_at	AFFY CSV: C37_09750 /DEF=Section:11 Forward BEST NR:AAX16015.1 2e-57 trehalose-6-phosphate synthase [Ginkgo biloba] gb|AAX16014.1| trehalose-6-phosphate synthase [Ginkgo biloba] /REP_ORG=Citrus
	Cit.1136.1.S1_s_at	AFFY CSV: C37_01438 /DEF=Section:2 Forward ESTs:8 BEST NR:AAQ10000.1 1e-124 putative fructokinase 2; S2 self-incompatibility locus-linked 3.16 protein [Petunia integrifolia subsp. inflata] /REP_ORG=Citrus
sucrose metabolic process	Cit.29566.1.S1_s_at	AFFY CSV: C37_04332 /DEF=Section:11 Forward BEST NR:NP_178270.1 1e-53 invertase/pectin methylesterase inhibitor family protein [Arabidopsis thaliana] /REP_ORG=Citrus
	Cit.4211.1.S1_at	AFFY CSV: C37_05337 /DEF=Section:2 Forward ESTs:9 BEST NR:AAN28891.1 1e-104 At1g02640/T14P4_11 [Arabidopsis thaliana] ref|NP_563659.1| glycosyl hydrolase family 3 protein [Arabidopsis thaliana] gb|AAK56255.1| At1g026 /REP_ORG=Citrus
	Cit.1988.1.S1_s_at	AFFY CSV: C37_02507 /DEF=Section:2 Forward ESTs:20 BEST NR:JQ1670 1e-104 polygalacturonase (EC 3.2.1.15) 1 beta chain precursor - tomato gb|AAB39547.1| polygalacturonase isoenzyme 1 beta subunit gb|AAA34181.1| pol /REP_ORG=Citrus
	Cit.20852.1.S1_s_at	AFFY CSV: C37_45410 /DEF=Section:8 Forward BEST NR:BAB11650.1 2e-20 trehalose-6-phosphate phosphatase [Arabidopsis thaliana] /REP_ORG=Citrus
	Cit.13252.1.S1_at	AFFY CSV: C37_17558 /DEF=Section:2 Forward ESTs:6 BEST NR:AAD12577.1 1e-130 putative cellulase [Fragaria x ananassa] /REP_ORG=Citrus
	Cit.30208.1.S1_at	AFFY CSV: C37_09825 /DEF=Section:11 Forward BEST NR:AAQ17461.1 3e-90 beta-D-glucosidase [Gossypium hirsutum] /REP_ORG=Citrus
	Cit.14906.1.S1_at	AFFY CSV: C37_19780 /DEF=Section:2 Forward ESTs:2 BEST NR:NP_201319.2 2e-92 trehalose-6-phosphate phosphatase
	Cit.24193.1.S1_at	AFFY CSV: C37_40799 /DEF=Section:9 Reversed BEST NR:NP_851171.1 3e-57 trehalose-6-phosphate phosphatase (TPPA) [Arabidopsis thaliana] ref|NP_974922.1| trehalose-6-phosphate phosphatase (TPPA) [Arabidopsis thali /REP_ORG=Citrus
	Cit.25025.1.S1_s_at	AFFY CSV: C37_24646 /DEF=Section:10 Reversed BEST NR:NP_177480.1 8e-79 sucrose synthase
	Cit.14905.1.S1_s_at	AFFY CSV: C37_19779 /DEF=Section:2 Forward ESTs:2 BEST NR:NP_201319.2 5e-46 trehalose-6-phosphate phosphatase
	Cit.3554.1.S1_s_at	AFFY CSV: C37_04486 /DEF=Section:2 Forward ESTs:5 BEST NR:T07885 1e-124 cellulase (EC 3.2.1.4) - sweet orange gb|AAB65156.1| basic cellulase [Citrus sinensis] /REP_ORG=Citrus
	Cit.1136.1.S1_s_at	AFFY CSV: C37_01438 /DEF=Section:2 Forward ESTs:8 BEST NR:AAQ10000.1 1e-124 putative fructokinase 2; S2 self-incompatibility locus-linked 3.16 protein [Petunia integrifolia subsp. inflata] /REP_ORG=Citrus
starch metabolic process	Cit.29566.1.S1_s_at	AFFY CSV: C37_04332 /DEF=Section:11 Forward BEST NR:NP_178270.1 1e-53 invertase/pectin methylesterase inhibitor family protein [Arabidopsis thaliana] /REP_ORG=Citrus
	Cit.4211.1.S1_at	AFFY CSV: C37_05337 /DEF=Section:2 Forward ESTs:9 BEST NR:AAN28891.1 1e-104 At1g02640/T14P4_11 [Arabidopsis thaliana] ref|NP_563659.1| glycosyl hydrolase family 3 protein [Arabidopsis thaliana] gb|AAK56255.1| At1g026 /REP_ORG=Citrus
	Cit.1988.1.S1_s_at	AFFY CSV: C37_02507 /DEF=Section:2 Forward ESTs:20 BEST NR:JQ1670 1e-104 polygalacturonase (EC 3.2.1.15) 1 beta chain precursor - tomato gb|AAB39547.1| polygalacturonase isoenzyme 1 beta subunit gb|AAA34181.1| pol /REP_ORG=Citrus
	Cit.20852.1.S1_s_at	AFFY CSV: C37_45410 /DEF=Section:8 Forward BEST NR:BAB11650.1 2e-20 trehalose-6-phosphate phosphatase [Arabidopsis thaliana] /REP_ORG=Citrus
	Cit.13252.1.S1_at	AFFY CSV: C37_17558 /DEF=Section:2 Forward ESTs:6 BEST NR:AAD12577.1 1e-130 putative cellulase [Fragaria x ananassa] /REP_ORG=Citrus
	Cit.30208.1.S1_at	AFFY CSV: C37_09825 /DEF=Section:11 Forward BEST NR:AAQ17461.1 3e-90 beta-D-glucosidase [Gossypium hirsutum] /REP_ORG=Citrus
	Cit.14906.1.S1_at	AFFY CSV: C37_19780 /DEF=Section:2 Forward ESTs:2 BEST NR:NP_201319.2 2e-92 trehalose-6-phosphate phosphatase
	Cit.24193.1.S1_at	AFFY CSV: C37_40799 /DEF=Section:9 Reversed BEST NR:NP_851171.1 3e-57 trehalose-6-phosphate phosphatase (TPPA) [Arabidopsis thaliana] ref|NP_974922.1| trehalose-6-phosphate phosphatase (TPPA) [Arabidopsis thali /REP_ORG=Citrus
	Cit.25025.1.S1_s_at	AFFY CSV: C37_24646 /DEF=Section:10 Reversed BEST NR:NP_177480.1 8e-79 sucrose synthase
	Cit.14905.1.S1_s_at	AFFY CSV: C37_19779 /DEF=Section:2 Forward ESTs:2 BEST NR:NP_201319.2 5e-46 trehalose-6-phosphate phosphatase
	Cit.3554.1.S1_s_at	AFFY CSV: C37_04486 /DEF=Section:2 Forward ESTs:5 BEST NR:T07885 1e-124 cellulase (EC 3.2.1.4) - sweet orange gb|AAB65156.1| basic cellulase [Citrus sinensis] /REP_ORG=Citrus
	Cit.1136.1.S1_s_at	AFFY CSV: C37_01438 /DEF=Section:2 Forward ESTs:8 BEST NR:AAQ10000.1 1e-124 putative fructokinase 2; S2 self-incompatibility locus-linked 3.16 protein [Petunia integrifolia subsp. inflata] /REP_ORG=Citrus
cellular carbohydrate metabolic process	Cit.1988.1.S1_s_at	AFFY CSV: C37_02507 /DEF=Section:2 Forward ESTs:20 BEST NR:JQ1670 1e-104 polygalacturonase (EC 3.2.1.15) 1 beta chain precursor - tomato gb|AAB39547.1| polygalacturonase isoenzyme 1 beta subunit gb|AAA34181.1| pol /REP_ORG=Citrus
	Cit.4211.1.S1_at	AFFY CSV: C37_05337 /DEF=Section:2 Forward ESTs:9 BEST NR:AAN28891.1 1e-104 At1g02640/T14P4_11 [Arabidopsis thaliana] ref|NP_563659.1| glycosyl hydrolase family 3 protein [Arabidopsis thaliana] gb|AAK56255.1| At1g026 /REP_ORG=Citrus
	Cit.14906.1.S1_at	AFFY CSV: C37_19780 /DEF=Section:2 Forward ESTs:2 BEST NR:NP_201319.2 2e-92 trehalose-6-phosphate phosphatase
	Cit.14905.1.S1_s_at	AFFY CSV: C37_19779 /DEF=Section:2 Forward ESTs:2 BEST NR:NP_201319.2 5e-46 trehalose-6-phosphate phosphatase
	Cit.30185.1.S1_at	AFFY CSV: C37_09750 /DEF=Section:11 Forward BEST NR:AAX16015.1 2e-57 trehalose-6-phosphate synthase [Ginkgo biloba] gb|AAX16014.1| trehalose-6-phosphate synthase [Ginkgo biloba] /REP_ORG=Citrus
	Cit.1136.1.S1_s_at	AFFY CSV: C37_01438 /DEF=Section:2 Forward ESTs:8 BEST NR:AAQ10000.1 1e-124 putative fructokinase 2; S2 self-incompatibility locus-linked 3.16 protein [Petunia integrifolia subsp. inflata] /REP_ORG=Citrus
	Cit.30208.1.S1_at	AFFY CSV: C37_09825 /DEF=Section:11 Forward BEST NR:AAQ17461.1 3e-90 beta-D-glucosidase [Gossypium hirsutum] /REP_ORG=Citrus
	Cit.13455.1.S1_s_at	AFFY CSV: C37_17819 /DEF=Section:2 Forward ESTs:4 BEST NR:AAN87142.1 1e-110 xyloglucan endotransglycosylase precursor [Populus tremula x Populus tremuloides] /REP_ORG=Citrus
	Cit.24646.1.S1_s_at	AFFY CSV: C37_42080 /DEF=Section:9 Reversed BEST NR:AAM66078.1 1e-39 endo-xyloglucan transferase
	Cit.1134.1.S1_s_at	AFFY CSV: C37_01436 /DEF=Section:2 Forward ESTs:6 BEST NR:BAB43909.1 1e-139 phosphoenolpyruvate carboxykinase [Flaveria pringlei] /REP_ORG=Citrus
	Cit.3554.1.S1_s_at	AFFY CSV: C37_04486 /DEF=Section:2 Forward ESTs:5 BEST NR:T07885 1e-124 cellulase (EC 3.2.1.4) - sweet orange gb|AAB65156.1| basic cellulase [Citrus sinensis] /REP_ORG=Citrus
	Cit.29566.1.S1_s_at	AFFY CSV: C37_04332 /DEF=Section:11 Forward BEST NR:NP_178270.1 1e-53 invertase/pectin methylesterase inhibitor family protein [Arabidopsis thaliana] /REP_ORG=Citrus
	Cit.20852.1.S1_s_at	AFFY CSV: C37_45410 /DEF=Section:8 Forward BEST NR:BAB11650.1 2e-20 trehalose-6-phosphate phosphatase [Arabidopsis thaliana] /REP_ORG=Citrus
	Cit.25025.1.S1_s_at	AFFY CSV: C37_24646 /DEF=Section:10 Reversed BEST NR:NP_177480.1 8e-79 sucrose synthase
	Cit.12948.1.S1_at	AFFY CSV: C37_17176 /DEF=Section:2 Forward ESTs:7 BEST NR:AAL36066.1 1e-105 At1g02270/T6A9_9 [Arabidopsis thaliana] gb|AAK96608.1| At1g02270/T6A9_9 [Arabidopsis thaliana] ref|NP_563646.1| endonuclease/exonuclease/pho /REP_ORG=Citrus
	Cit.30906.1.S1_s_at	AFFY CSV: C37_19106 /DEF=Section:11 Forward BEST NR:CAC86995.1 1e-110 ATP citrate lyase a-subunit [Lupinus albus] /REP_ORG=Citrus
	Cit.30531.1.S1_s_at	AFFY CSV: C37_13039 /DEF=Section:11 Forward BEST NR:AAM67459.1 2e-84 putative pyruvate decarboxylase-1 Pdc1 [Arabidopsis thaliana] gb|AAL49793.1| putative pyruvate decarboxylase-1 Pdc1 [Arabidopsis thaliana] e /REP_ORG=Citrus
	Cit.30513.1.S1_x_at	AFFY CSV: C37_12795 /DEF=Section:11 Forward BEST NR:BAB86890.1 1e-111 syringolide-induced protein 19-1-5 [Glycine max] /REP_ORG=Citrus
	Cit.24193.1.S1_at	AFFY CSV: C37_40799 /DEF=Section:9 Reversed BEST NR:NP_851171.1 3e-57 trehalose-6-phosphate phosphatase (TPPA) [Arabidopsis thaliana] ref|NP_974922.1| trehalose-6-phosphate phosphatase (TPPA) [Arabidopsis thali /REP_ORG=Citrus
	Cit.13252.1.S1_at	AFFY CSV: C37_17558 /DEF=Section:2 Forward ESTs:6 BEST NR:AAD12577.1 1e-130 putative cellulase [Fragaria x ananassa] /REP_ORG=Citrus
	Cit.9421.1.S1_s_at	AFFY CSV: C37_12792 /DEF=Section:2 Forward ESTs:7 BEST NR:CAA10231.1 2e-92 xyloglucan endotransglycosylase 1 [Fagus sylvatica] /REP_ORG=Citrus
	Cit.30085.1.S1_s_at	AFFY CSV: C37_09301 /DEF=Section:11 Forward BEST NR:BAB43909.1 9e-65 phosphoenolpyruvate carboxykinase [Flaveria pringlei] /REP_ORG=Citrus
glycoside biosynthetic process	Cit.20852.1.S1_s_at	AFFY CSV: C37_45410 /DEF=Section:8 Forward BEST NR:BAB11650.1 2e-20 trehalose-6-phosphate phosphatase [Arabidopsis thaliana] /REP_ORG=Citrus
	Cit.14906.1.S1_at	AFFY CSV: C37_19780 /DEF=Section:2 Forward ESTs:2 BEST NR:NP_201319.2 2e-92 trehalose-6-phosphate phosphatase
	Cit.24193.1.S1_at	AFFY CSV: C37_40799 /DEF=Section:9 Reversed BEST NR:NP_851171.1 3e-57 trehalose-6-phosphate phosphatase (TPPA) [Arabidopsis thaliana] ref|NP_974922.1| trehalose-6-phosphate phosphatase (TPPA) [Arabidopsis thali /REP_ORG=Citrus
	Cit.25025.1.S1_s_at	AFFY CSV: C37_24646 /DEF=Section:10 Reversed BEST NR:NP_177480.1 8e-79 sucrose synthase
	Cit.14905.1.S1_s_at	AFFY CSV: C37_19779 /DEF=Section:2 Forward ESTs:2 BEST NR:NP_201319.2 5e-46 trehalose-6-phosphate phosphatase
	Cit.30185.1.S1_at	AFFY CSV: C37_09750 /DEF=Section:11 Forward BEST NR:AAX16015.1 2e-57 trehalose-6-phosphate synthase [Ginkgo biloba] gb|AAX16014.1| trehalose-6-phosphate synthase [Ginkgo biloba] /REP_ORG=Citrus
response to inorganic substance	Cit.4865.1.S1_s_at	AFFY CSV: C37_06164 /DEF=Section:2 Forward ESTs:4 BEST NR:AAM91167.1 7e-47 putative myosin heavy chain [Arabidopsis thaliana] gb|AAM13080.1| putative myosin heavy chain [Arabidopsis thaliana] gb|AAL09731.1| At2g3224 /REP_ORG=Citrus
	Cit.30166.1.S1_at	AFFY CSV: C37_09664 /DEF=Section:11 Forward BEST NR:AAU95435.1 8e-57 At2g29410 [Arabidopsis thaliana] gb|AAT70445.1| At2g29410 [Arabidopsis thaliana] ref|NP_180502.2| zinc transporter
	Cit.34418.1.S1_at	AFFY CSV: C37_27158 /DEF=Section:12 Forward BEST NR:T07122 4e-21 calmodulin CAM5 - soybean gb|AAA33948.1| calmodulin prf||2121384E calmodulin /REP_ORG=Citrus
	Cit.4865.1.S1_at	AFFY CSV: C37_06164 /DEF=Section:2 Forward ESTs:4 BEST NR:AAM91167.1 7e-47 putative myosin heavy chain [Arabidopsis thaliana] gb|AAM13080.1| putative myosin heavy chain [Arabidopsis thaliana] gb|AAL09731.1| At2g3224 /REP_ORG=Citrus
	Cit.30448.1.S1_s_at	AFFY CSV: C37_11695 /DEF=Section:11 Forward BEST NR:T07161 5e-22 late-embryogenesis protein homolog - tomato gb|AAA86424.1| heat shock protein gb|AAA34193.1| ORF /REP_ORG=Citrus
	Cit.12697.1.S1_at	AFFY CSV: C37_16875 /DEF=Section:2 Forward ESTs:10 BEST NR:NP_173866.1 6e-23 polcalcin
	Cit.38637.1.S1_at	AFFY CSV: C37_44579 /DEF=Section:12 Forward BEST NR:T06437 2e-37 calmodulin - garden pea gb|AAA92677.1| calmodulin-like protein /REP_ORG=Citrus
	Cit.22861.1.S1_at	AFFY CSV: C37_33684 /DEF=Section:9 Reversed BEST NR:BAB86892.1 9e-35 syringolide-induced protein 1-3-1A [Glycine max] /REP_ORG=Citrus
response to metal ion	Cit.4865.1.S1_s_at	AFFY CSV: C37_06164 /DEF=Section:2 Forward ESTs:4 BEST NR:AAM91167.1 7e-47 putative myosin heavy chain [Arabidopsis thaliana] gb|AAM13080.1| putative myosin heavy chain [Arabidopsis thaliana] gb|AAL09731.1| At2g3224 /REP_ORG=Citrus
	Cit.30166.1.S1_at	AFFY CSV: C37_09664 /DEF=Section:11 Forward BEST NR:AAU95435.1 8e-57 At2g29410 [Arabidopsis thaliana] gb|AAT70445.1| At2g29410 [Arabidopsis thaliana] ref|NP_180502.2| zinc transporter
	Cit.34418.1.S1_at	AFFY CSV: C37_27158 /DEF=Section:12 Forward BEST NR:T07122 4e-21 calmodulin CAM5 - soybean gb|AAA33948.1| calmodulin prf||2121384E calmodulin /REP_ORG=Citrus
	Cit.4865.1.S1_at	AFFY CSV: C37_06164 /DEF=Section:2 Forward ESTs:4 BEST NR:AAM91167.1 7e-47 putative myosin heavy chain [Arabidopsis thaliana] gb|AAM13080.1| putative myosin heavy chain [Arabidopsis thaliana] gb|AAL09731.1| At2g3224 /REP_ORG=Citrus
	Cit.12697.1.S1_at	AFFY CSV: C37_16875 /DEF=Section:2 Forward ESTs:10 BEST NR:NP_173866.1 6e-23 polcalcin
	Cit.38637.1.S1_at	AFFY CSV: C37_44579 /DEF=Section:12 Forward BEST NR:T06437 2e-37 calmodulin - garden pea gb|AAA92677.1| calmodulin-like protein /REP_ORG=Citrus
	Cit.22861.1.S1_at	AFFY CSV: C37_33684 /DEF=Section:9 Reversed BEST NR:BAB86892.1 9e-35 syringolide-induced protein 1-3-1A [Glycine max] /REP_ORG=Citrus
response to auxin stimulus	Cit.35499.1.S1_at	AFFY CSV: C37_28829 /DEF=Section:12 Forward BEST NR:NP_193993.1 2e-42 auxin-responsive family protein [Arabidopsis thaliana] pir||T04557 hypothetical protein T12H17.10 - Arabidopsis thaliana /REP_ORG=Citrus
	Cit.23036.1.S1_s_at	AFFY CSV: C37_34554 /DEF=Section:9 Reversed BEST NR:AAC61292.1 9e-30 putative auxin-regulated protein [Arabidopsis thaliana] pir||D84523 probable auxin-regulated protein [imported] - Arabidopsis thaliana ref|N /REP_ORG=Citrus
	Cit.28616.1.S1_at	AFFY CSV: C37_40041 /DEF=Section:10 Reversed BEST NR:AAN18195.1 7e-86 At2g47750/F17A22.14 [Arabidopsis thaliana] gb|AAC63630.1| putative auxin-responsive protein [Arabidopsis thaliana] gb|AAL06947.1| At2g47750/ /REP_ORG=Citrus
	Cit.26243.1.S1_at	AFFY CSV: C37_32914 /DEF=Section:10 Reversed BEST NR:NP_194456.1 1e-41 auxin-responsive GH3 family protein [Arabidopsis thaliana] pir||T05750 auxin-regulated protein GH3 homolog M4I22.70 - Arabidopsis thaliana /REP_ORG=Citrus
	Cit.13455.1.S1_s_at	AFFY CSV: C37_17819 /DEF=Section:2 Forward ESTs:4 BEST NR:AAN87142.1 1e-110 xyloglucan endotransglycosylase precursor [Populus tremula x Populus tremuloides] /REP_ORG=Citrus
	Cit.12697.1.S1_at	AFFY CSV: C37_16875 /DEF=Section:2 Forward ESTs:10 BEST NR:NP_173866.1 6e-23 polcalcin
	Cit.5201.1.S1_at	AFFY CSV: C37_06583 /DEF=Section:2 Forward ESTs:5 BEST NR:AAD32141.1 1e-138 Nt-gh3 deduced protein [Nicotiana tabacum] /REP_ORG=Citrus
	Cit.30008.1.S1_at	AFFY CSV: C37_08977 /DEF=Section:11 Forward BEST NR:AAN18195.1 4e-52 At2g47750/F17A22.14 [Arabidopsis thaliana] gb|AAC63630.1| putative auxin-responsive protein [Arabidopsis thaliana] gb|AAL06947.1| At2g47750/ /REP_ORG=Citrus
	Cit.22861.1.S1_at	AFFY CSV: C37_33684 /DEF=Section:9 Reversed BEST NR:BAB86892.1 9e-35 syringolide-induced protein 1-3-1A [Glycine max] /REP_ORG=Citrus
	Cit.38568.1.S1_at	AFFY CSV: C37_44507 /DEF=Section:12 Forward BEST NR:AAL47444.1 6e-34 AT5g54510/F24B18_13 [Arabidopsis thaliana] /REP_ORG=Citrus

## Sheet: Bud OFF May list
secondary metabolic process	Cit.6804.1.S1_at	AFFY CSV: C37_08968 /DEF=Section:2 Forward ESTs:2 BEST NR:AAB91983.1 6e-81 COP1 regulatory protein [Arabidopsis thaliana] ref|NP_180854.1| COP1 regulatory protein [Arabidopsis thaliana] pir||T01112 photomorphogenesi /REP_ORG=Citrus
	Cit.12748.1.S1_s_at	AFFY CSV: C37_16941 /DEF=Section:2 Forward ESTs:7 BEST NR:AAR86689.1 1e-124 fructose-bisphosphate aldolase [Glycine max] /REP_ORG=Citrus
	Cit.13265.1.S1_at	AFFY CSV: C37_17576 /DEF=Section:2 Forward ESTs:8 BEST NR:NP_568246.1 4e-66 bZIP protein HY5 (HY5) [Arabidopsis thaliana] sp|O24646|HY5_ARATH Protein HY5 (AtbZIP56) /REP_ORG=Citrus
	Cit.16701.1.S1_at	AFFY CSV: C37_22732 /DEF=Section:2 Forward ESTs:2 BEST NR:CAD62568.1 5e-29 putative tropinone reductase [Calystegia sepium] /REP_ORG=Citrus
	Cit.12818.1.S1_at	AFFY CSV: C37_17031 /DEF=Section:2 Forward ESTs:4 BEST NR:CAD47830.1 9e-64 hydroxycinnamoyl transferase [Nicotiana tabacum] /REP_ORG=Citrus
	Cit.3351.1.S1_s_at	AFFY CSV: C37_04237 /DEF=Section:2 Forward ESTs:6 BEST NR:AAD25541.1 1e-138 fructose-1
	Cit.10353.1.S1_at	AFFY CSV: C37_13940 /DEF=Section:2 Forward ESTs:31 BEST NR:O48922 1e-121 Cytochrome P450 98A2 gb|AAB94587.1| CYP98A2p [Glycine max] pir||T05937 cytochrome P450 monooxygenase 98A2p - soybean /REP_ORG=Citrus
	Cit.26163.1.S1_at	AFFY CSV: C37_32690 /DEF=Section:10 Reversed BEST NR:NP_568304.1 1e-79 L-aspartate oxidase family protein [Arabidopsis thaliana] gb|AAK73984.1| AT5g14760/T9L3_60 [Arabidopsis thaliana] /REP_ORG=Citrus
	Cit.30349.1.S1_at	AFFY CSV: C37_10591 /DEF=Section:11 Forward BEST NR:NP_998544.1 1e-42 zgc:66329 [Danio rerio] gb|AAH54684.1| Zgc:66329 [Danio rerio] /REP_ORG=Citrus
	Cit.13287.1.S1_s_at	AFFY CSV: C37_17605 /DEF=Section:2 Forward ESTs:5 BEST NR:AAC33235.1 1e-115 putative cytochrome P450 [Arabidopsis thaliana] ref|NP_180473.1| cytochrome P450 family protein [Arabidopsis thaliana] pir||T02739 probable /REP_ORG=Citrus
	Cit.13816.1.S1_s_at	AFFY CSV: C37_18284 /DEF=Section:2 Forward ESTs:3 BEST NR:CAC34420.1 8e-88 tropinone reductase I [Solanum tuberosum] /REP_ORG=Citrus
	Cit.13245.1.S1_at	AFFY CSV: C37_17549 /DEF=Section:2 Forward ESTs:7 BEST NR:T11579 1e-93 probable short chain alcohol dehydrogenase CPRD12
	Cit.17011.1.S1_s_at	AFFY CSV: C37_01399 /DEF=Section:3 Forward ESTs:3 BEST NR:NP_568154.1 8e-74 chalcone-flavanone isomerase family protein [Arabidopsis thaliana] ref|NP_850770.1| chalcone-flavanone isomerase family protein [Arabidopsis /REP_ORG=Citrus
	Cit.30567.1.S1_at	AFFY CSV: C37_13939 /DEF=Section:11 Forward BEST NR:O48922 2e-71 Cytochrome P450 98A2 gb|AAB94587.1| CYP98A2p [Glycine max] pir||T05937 cytochrome P450 monooxygenase 98A2p - soybean /REP_ORG=Citrus
	Cit.11987.1.S1_s_at	AFFY CSV: C37_15975 /DEF=Section:2 Forward ESTs:8 BEST NR:AAC24504.1 1e-121 4-coumarate:CoA ligase [Populus tremuloides] pir||T08075 4-coumarate-CoA ligase (EC 6.2.1.12) (clone 4CL2) [validated] - quaking aspen /REP_ORG=Citrus
	Cit.14131.1.S1_at	AFFY CSV: C37_18708 /DEF=Section:2 Forward ESTs:6 BEST NR:NP_189600.1 2e-44 transferase family protein [Arabidopsis thaliana] dbj|BAB01191.1| anthocyanin 5-aromatic acyltransferase-like protein [Arabidopsis /REP_ORG=Citrus
	Cit.21653.1.S1_at	AFFY CSV: C37_25258 /DEF=Section:9 Reversed BEST NR:CAA71408.1 2e-22 homologous to plastidic aldolases [Solanum tuberosum] pir||T07418 probable fructose-bisphosphate aldolase (EC 4.1.2.13) precursor
	Cit.30458.1.S1_s_at	AFFY CSV: C37_11774 /DEF=Section:11 Forward BEST NR:Q9XJ57 1e-160 Chalcone synthase 2 (Naringenin-chalcone synthase 2) dbj|BAA81664.1| chalcone synthase [Citrus sinensis] /REP_ORG=Citrus
	Cit.10824.1.S1_at	AFFY CSV: C37_14526 /DEF=Section:2 Forward ESTs:20 BEST NR:Q43716 1e-111 Flavonol 3-O-glucosyltransferase (UDP-glucose flavonoid 3-O-glucosyltransferase) (Anthocyanin rhamnosyl /REP_ORG=Citrus
	Cit.18001.1.S1_at	AFFY CSV: C37_18080 /DEF=Section:3 Forward ESTs:6 BEST NR:AAG60665.1 1e-116 tyrosine/dopa decarboxylase [Thalictrum flavum subsp. glaucum] /REP_ORG=Citrus
	Cit.27206.1.S1_at	AFFY CSV: C37_35472 /DEF=Section:10 Reversed BEST NR:AAB91983.1 5e-96 COP1 regulatory protein [Arabidopsis thaliana] ref|NP_180854.1| COP1 regulatory protein [Arabidopsis thaliana] pir||T01112 photomorphogenesi /REP_ORG=Citrus
	Cit.16701.1.S1_s_at	AFFY CSV: C37_22732 /DEF=Section:2 Forward ESTs:2 BEST NR:CAD62568.1 5e-29 putative tropinone reductase [Calystegia sepium] /REP_ORG=Citrus
	Cit.28372.1.S1_at	AFFY CSV: C37_39039 /DEF=Section:10 Reversed BEST NR:AAP04064.1 1e-07 putative cinnamoyl-CoA reductase [Arabidopsis thaliana] gb|AAO64184.1| putative cinnamoyl-CoA reductase [Arabidopsis thaliana] gb|AAC78522.1 /REP_ORG=Citrus
	Cit.5658.1.S1_at	AFFY CSV: C37_07226 /DEF=Section:2 Forward ESTs:4 BEST NR:NP_181661.1 3e-77 strictosidine synthase family protein [Arabidopsis thaliana] pir||A84840 probable strictosidine synthase [imported] - Arabidopsis thaliana /REP_ORG=Citrus
	Cit.6322.1.S1_at	AFFY CSV: C37_08197 /DEF=Section:2 Forward ESTs:2 BEST NR:CAA54612.1 3e-73 UTP-glucose glucosyltransferase [Manihot esculenta] sp|Q40287|UFO5_MANES Flavonol 3-O-glucosyltransferase 5 (UDP-glucose flavonoid 3-O-gluco /REP_ORG=Citrus
	Cit.13882.1.S1_s_at	AFFY CSV: C37_18376 /DEF=Section:2 Forward ESTs:3 BEST NR:AAS00612.1 7e-97 UDP-glucose-flavonoid-3-O-glucosyl transferase [Citrus sinensis] /REP_ORG=Citrus
	Cit.871.1.S1_s_at	AFFY CSV: C37_01100 /DEF=Section:2 Forward ESTs:31 BEST NR:Q9ZWQ9 1e-146 Flavonol synthase (FLS) (CitFLS) dbj|BAA36554.1| flavonol synthase [Citrus unshiu] /REP_ORG=Citrus
	Cit.21962.1.S1_at	AFFY CSV: C37_29604 /DEF=Section:9 Reversed BEST NR:BAB86932.1 2e-61 glucosyltransferase-14 [Vigna angularis] /REP_ORG=Citrus
phenylpropanoid metabolic process	Cit.28372.1.S1_at	AFFY CSV: C37_39039 /DEF=Section:10 Reversed BEST NR:AAP04064.1 1e-07 putative cinnamoyl-CoA reductase [Arabidopsis thaliana] gb|AAO64184.1| putative cinnamoyl-CoA reductase [Arabidopsis thaliana] gb|AAC78522.1 /REP_ORG=Citrus
	Cit.6804.1.S1_at	AFFY CSV: C37_08968 /DEF=Section:2 Forward ESTs:2 BEST NR:AAB91983.1 6e-81 COP1 regulatory protein [Arabidopsis thaliana] ref|NP_180854.1| COP1 regulatory protein [Arabidopsis thaliana] pir||T01112 photomorphogenesi /REP_ORG=Citrus
	Cit.12818.1.S1_at	AFFY CSV: C37_17031 /DEF=Section:2 Forward ESTs:4 BEST NR:CAD47830.1 9e-64 hydroxycinnamoyl transferase [Nicotiana tabacum] /REP_ORG=Citrus
	Cit.13265.1.S1_at	AFFY CSV: C37_17576 /DEF=Section:2 Forward ESTs:8 BEST NR:NP_568246.1 4e-66 bZIP protein HY5 (HY5) [Arabidopsis thaliana] sp|O24646|HY5_ARATH Protein HY5 (AtbZIP56) /REP_ORG=Citrus
	Cit.14131.1.S1_at	AFFY CSV: C37_18708 /DEF=Section:2 Forward ESTs:6 BEST NR:NP_189600.1 2e-44 transferase family protein [Arabidopsis thaliana] dbj|BAB01191.1| anthocyanin 5-aromatic acyltransferase-like protein [Arabidopsis /REP_ORG=Citrus
	Cit.30458.1.S1_s_at	AFFY CSV: C37_11774 /DEF=Section:11 Forward BEST NR:Q9XJ57 1e-160 Chalcone synthase 2 (Naringenin-chalcone synthase 2) dbj|BAA81664.1| chalcone synthase [Citrus sinensis] /REP_ORG=Citrus
	Cit.10824.1.S1_at	AFFY CSV: C37_14526 /DEF=Section:2 Forward ESTs:20 BEST NR:Q43716 1e-111 Flavonol 3-O-glucosyltransferase (UDP-glucose flavonoid 3-O-glucosyltransferase) (Anthocyanin rhamnosyl /REP_ORG=Citrus
	Cit.13882.1.S1_s_at	AFFY CSV: C37_18376 /DEF=Section:2 Forward ESTs:3 BEST NR:AAS00612.1 7e-97 UDP-glucose-flavonoid-3-O-glucosyl transferase [Citrus sinensis] /REP_ORG=Citrus
	Cit.871.1.S1_s_at	AFFY CSV: C37_01100 /DEF=Section:2 Forward ESTs:31 BEST NR:Q9ZWQ9 1e-146 Flavonol synthase (FLS) (CitFLS) dbj|BAA36554.1| flavonol synthase [Citrus unshiu] /REP_ORG=Citrus
	Cit.10353.1.S1_at	AFFY CSV: C37_13940 /DEF=Section:2 Forward ESTs:31 BEST NR:O48922 1e-121 Cytochrome P450 98A2 gb|AAB94587.1| CYP98A2p [Glycine max] pir||T05937 cytochrome P450 monooxygenase 98A2p - soybean /REP_ORG=Citrus
	Cit.6322.1.S1_at	AFFY CSV: C37_08197 /DEF=Section:2 Forward ESTs:2 BEST NR:CAA54612.1 3e-73 UTP-glucose glucosyltransferase [Manihot esculenta] sp|Q40287|UFO5_MANES Flavonol 3-O-glucosyltransferase 5 (UDP-glucose flavonoid 3-O-gluco /REP_ORG=Citrus
	Cit.27206.1.S1_at	AFFY CSV: C37_35472 /DEF=Section:10 Reversed BEST NR:AAB91983.1 5e-96 COP1 regulatory protein [Arabidopsis thaliana] ref|NP_180854.1| COP1 regulatory protein [Arabidopsis thaliana] pir||T01112 photomorphogenesi /REP_ORG=Citrus
	Cit.17011.1.S1_s_at	AFFY CSV: C37_01399 /DEF=Section:3 Forward ESTs:3 BEST NR:NP_568154.1 8e-74 chalcone-flavanone isomerase family protein [Arabidopsis thaliana] ref|NP_850770.1| chalcone-flavanone isomerase family protein [Arabidopsis /REP_ORG=Citrus
	Cit.30567.1.S1_at	AFFY CSV: C37_13939 /DEF=Section:11 Forward BEST NR:O48922 2e-71 Cytochrome P450 98A2 gb|AAB94587.1| CYP98A2p [Glycine max] pir||T05937 cytochrome P450 monooxygenase 98A2p - soybean /REP_ORG=Citrus
	Cit.21962.1.S1_at	AFFY CSV: C37_29604 /DEF=Section:9 Reversed BEST NR:BAB86932.1 2e-61 glucosyltransferase-14 [Vigna angularis] /REP_ORG=Citrus
	Cit.11987.1.S1_s_at	AFFY CSV: C37_15975 /DEF=Section:2 Forward ESTs:8 BEST NR:AAC24504.1 1e-121 4-coumarate:CoA ligase [Populus tremuloides] pir||T08075 4-coumarate-CoA ligase (EC 6.2.1.12) (clone 4CL2) [validated] - quaking aspen /REP_ORG=Citrus
flavonoid metabolic process	Cit.6804.1.S1_at	AFFY CSV: C37_08968 /DEF=Section:2 Forward ESTs:2 BEST NR:AAB91983.1 6e-81 COP1 regulatory protein [Arabidopsis thaliana] ref|NP_180854.1| COP1 regulatory protein [Arabidopsis thaliana] pir||T01112 photomorphogenesi /REP_ORG=Citrus
	Cit.14131.1.S1_at	AFFY CSV: C37_18708 /DEF=Section:2 Forward ESTs:6 BEST NR:NP_189600.1 2e-44 transferase family protein [Arabidopsis thaliana] dbj|BAB01191.1| anthocyanin 5-aromatic acyltransferase-like protein [Arabidopsis /REP_ORG=Citrus
	Cit.13265.1.S1_at	AFFY CSV: C37_17576 /DEF=Section:2 Forward ESTs:8 BEST NR:NP_568246.1 4e-66 bZIP protein HY5 (HY5) [Arabidopsis thaliana] sp|O24646|HY5_ARATH Protein HY5 (AtbZIP56) /REP_ORG=Citrus
	Cit.10824.1.S1_at	AFFY CSV: C37_14526 /DEF=Section:2 Forward ESTs:20 BEST NR:Q43716 1e-111 Flavonol 3-O-glucosyltransferase (UDP-glucose flavonoid 3-O-glucosyltransferase) (Anthocyanin rhamnosyl /REP_ORG=Citrus
	Cit.30458.1.S1_s_at	AFFY CSV: C37_11774 /DEF=Section:11 Forward BEST NR:Q9XJ57 1e-160 Chalcone synthase 2 (Naringenin-chalcone synthase 2) dbj|BAA81664.1| chalcone synthase [Citrus sinensis] /REP_ORG=Citrus
	Cit.13882.1.S1_s_at	AFFY CSV: C37_18376 /DEF=Section:2 Forward ESTs:3 BEST NR:AAS00612.1 7e-97 UDP-glucose-flavonoid-3-O-glucosyl transferase [Citrus sinensis] /REP_ORG=Citrus
	Cit.871.1.S1_s_at	AFFY CSV: C37_01100 /DEF=Section:2 Forward ESTs:31 BEST NR:Q9ZWQ9 1e-146 Flavonol synthase (FLS) (CitFLS) dbj|BAA36554.1| flavonol synthase [Citrus unshiu] /REP_ORG=Citrus
	Cit.10353.1.S1_at	AFFY CSV: C37_13940 /DEF=Section:2 Forward ESTs:31 BEST NR:O48922 1e-121 Cytochrome P450 98A2 gb|AAB94587.1| CYP98A2p [Glycine max] pir||T05937 cytochrome P450 monooxygenase 98A2p - soybean /REP_ORG=Citrus
	Cit.6322.1.S1_at	AFFY CSV: C37_08197 /DEF=Section:2 Forward ESTs:2 BEST NR:CAA54612.1 3e-73 UTP-glucose glucosyltransferase [Manihot esculenta] sp|Q40287|UFO5_MANES Flavonol 3-O-glucosyltransferase 5 (UDP-glucose flavonoid 3-O-gluco /REP_ORG=Citrus
	Cit.27206.1.S1_at	AFFY CSV: C37_35472 /DEF=Section:10 Reversed BEST NR:AAB91983.1 5e-96 COP1 regulatory protein [Arabidopsis thaliana] ref|NP_180854.1| COP1 regulatory protein [Arabidopsis thaliana] pir||T01112 photomorphogenesi /REP_ORG=Citrus
	Cit.17011.1.S1_s_at	AFFY CSV: C37_01399 /DEF=Section:3 Forward ESTs:3 BEST NR:NP_568154.1 8e-74 chalcone-flavanone isomerase family protein [Arabidopsis thaliana] ref|NP_850770.1| chalcone-flavanone isomerase family protein [Arabidopsis /REP_ORG=Citrus
	Cit.30567.1.S1_at	AFFY CSV: C37_13939 /DEF=Section:11 Forward BEST NR:O48922 2e-71 Cytochrome P450 98A2 gb|AAB94587.1| CYP98A2p [Glycine max] pir||T05937 cytochrome P450 monooxygenase 98A2p - soybean /REP_ORG=Citrus
	Cit.21962.1.S1_at	AFFY CSV: C37_29604 /DEF=Section:9 Reversed BEST NR:BAB86932.1 2e-61 glucosyltransferase-14 [Vigna angularis] /REP_ORG=Citrus
phenylpropanoid biosynthetic process	Cit.28372.1.S1_at	AFFY CSV: C37_39039 /DEF=Section:10 Reversed BEST NR:AAP04064.1 1e-07 putative cinnamoyl-CoA reductase [Arabidopsis thaliana] gb|AAO64184.1| putative cinnamoyl-CoA reductase [Arabidopsis thaliana] gb|AAC78522.1 /REP_ORG=Citrus
	Cit.12818.1.S1_at	AFFY CSV: C37_17031 /DEF=Section:2 Forward ESTs:4 BEST NR:CAD47830.1 9e-64 hydroxycinnamoyl transferase [Nicotiana tabacum] /REP_ORG=Citrus
	Cit.14131.1.S1_at	AFFY CSV: C37_18708 /DEF=Section:2 Forward ESTs:6 BEST NR:NP_189600.1 2e-44 transferase family protein [Arabidopsis thaliana] dbj|BAB01191.1| anthocyanin 5-aromatic acyltransferase-like protein [Arabidopsis /REP_ORG=Citrus
	Cit.6322.1.S1_at	AFFY CSV: C37_08197 /DEF=Section:2 Forward ESTs:2 BEST NR:CAA54612.1 3e-73 UTP-glucose glucosyltransferase [Manihot esculenta] sp|Q40287|UFO5_MANES Flavonol 3-O-glucosyltransferase 5 (UDP-glucose flavonoid 3-O-gluco /REP_ORG=Citrus
	Cit.10824.1.S1_at	AFFY CSV: C37_14526 /DEF=Section:2 Forward ESTs:20 BEST NR:Q43716 1e-111 Flavonol 3-O-glucosyltransferase (UDP-glucose flavonoid 3-O-glucosyltransferase) (Anthocyanin rhamnosyl /REP_ORG=Citrus
	Cit.13882.1.S1_s_at	AFFY CSV: C37_18376 /DEF=Section:2 Forward ESTs:3 BEST NR:AAS00612.1 7e-97 UDP-glucose-flavonoid-3-O-glucosyl transferase [Citrus sinensis] /REP_ORG=Citrus
	Cit.871.1.S1_s_at	AFFY CSV: C37_01100 /DEF=Section:2 Forward ESTs:31 BEST NR:Q9ZWQ9 1e-146 Flavonol synthase (FLS) (CitFLS) dbj|BAA36554.1| flavonol synthase [Citrus unshiu] /REP_ORG=Citrus
	Cit.10353.1.S1_at	AFFY CSV: C37_13940 /DEF=Section:2 Forward ESTs:31 BEST NR:O48922 1e-121 Cytochrome P450 98A2 gb|AAB94587.1| CYP98A2p [Glycine max] pir||T05937 cytochrome P450 monooxygenase 98A2p - soybean /REP_ORG=Citrus
	Cit.30458.1.S1_s_at	AFFY CSV: C37_11774 /DEF=Section:11 Forward BEST NR:Q9XJ57 1e-160 Chalcone synthase 2 (Naringenin-chalcone synthase 2) dbj|BAA81664.1| chalcone synthase [Citrus sinensis] /REP_ORG=Citrus
	Cit.17011.1.S1_s_at	AFFY CSV: C37_01399 /DEF=Section:3 Forward ESTs:3 BEST NR:NP_568154.1 8e-74 chalcone-flavanone isomerase family protein [Arabidopsis thaliana] ref|NP_850770.1| chalcone-flavanone isomerase family protein [Arabidopsis /REP_ORG=Citrus
	Cit.30567.1.S1_at	AFFY CSV: C37_13939 /DEF=Section:11 Forward BEST NR:O48922 2e-71 Cytochrome P450 98A2 gb|AAB94587.1| CYP98A2p [Glycine max] pir||T05937 cytochrome P450 monooxygenase 98A2p - soybean /REP_ORG=Citrus
	Cit.21962.1.S1_at	AFFY CSV: C37_29604 /DEF=Section:9 Reversed BEST NR:BAB86932.1 2e-61 glucosyltransferase-14 [Vigna angularis] /REP_ORG=Citrus
	Cit.11987.1.S1_s_at	AFFY CSV: C37_15975 /DEF=Section:2 Forward ESTs:8 BEST NR:AAC24504.1 1e-121 4-coumarate:CoA ligase [Populus tremuloides] pir||T08075 4-coumarate-CoA ligase (EC 6.2.1.12) (clone 4CL2) [validated] - quaking aspen /REP_ORG=Citrus
flavonoid biosynthetic process	Cit.14131.1.S1_at	AFFY CSV: C37_18708 /DEF=Section:2 Forward ESTs:6 BEST NR:NP_189600.1 2e-44 transferase family protein [Arabidopsis thaliana] dbj|BAB01191.1| anthocyanin 5-aromatic acyltransferase-like protein [Arabidopsis /REP_ORG=Citrus
	Cit.10824.1.S1_at	AFFY CSV: C37_14526 /DEF=Section:2 Forward ESTs:20 BEST NR:Q43716 1e-111 Flavonol 3-O-glucosyltransferase (UDP-glucose flavonoid 3-O-glucosyltransferase) (Anthocyanin rhamnosyl /REP_ORG=Citrus
	Cit.6322.1.S1_at	AFFY CSV: C37_08197 /DEF=Section:2 Forward ESTs:2 BEST NR:CAA54612.1 3e-73 UTP-glucose glucosyltransferase [Manihot esculenta] sp|Q40287|UFO5_MANES Flavonol 3-O-glucosyltransferase 5 (UDP-glucose flavonoid 3-O-gluco /REP_ORG=Citrus
	Cit.13882.1.S1_s_at	AFFY CSV: C37_18376 /DEF=Section:2 Forward ESTs:3 BEST NR:AAS00612.1 7e-97 UDP-glucose-flavonoid-3-O-glucosyl transferase [Citrus sinensis] /REP_ORG=Citrus
	Cit.871.1.S1_s_at	AFFY CSV: C37_01100 /DEF=Section:2 Forward ESTs:31 BEST NR:Q9ZWQ9 1e-146 Flavonol synthase (FLS) (CitFLS) dbj|BAA36554.1| flavonol synthase [Citrus unshiu] /REP_ORG=Citrus
	Cit.10353.1.S1_at	AFFY CSV: C37_13940 /DEF=Section:2 Forward ESTs:31 BEST NR:O48922 1e-121 Cytochrome P450 98A2 gb|AAB94587.1| CYP98A2p [Glycine max] pir||T05937 cytochrome P450 monooxygenase 98A2p - soybean /REP_ORG=Citrus
	Cit.30458.1.S1_s_at	AFFY CSV: C37_11774 /DEF=Section:11 Forward BEST NR:Q9XJ57 1e-160 Chalcone synthase 2 (Naringenin-chalcone synthase 2) dbj|BAA81664.1| chalcone synthase [Citrus sinensis] /REP_ORG=Citrus
	Cit.17011.1.S1_s_at	AFFY CSV: C37_01399 /DEF=Section:3 Forward ESTs:3 BEST NR:NP_568154.1 8e-74 chalcone-flavanone isomerase family protein [Arabidopsis thaliana] ref|NP_850770.1| chalcone-flavanone isomerase family protein [Arabidopsis /REP_ORG=Citrus
	Cit.30567.1.S1_at	AFFY CSV: C37_13939 /DEF=Section:11 Forward BEST NR:O48922 2e-71 Cytochrome P450 98A2 gb|AAB94587.1| CYP98A2p [Glycine max] pir||T05937 cytochrome P450 monooxygenase 98A2p - soybean /REP_ORG=Citrus
	Cit.21962.1.S1_at	AFFY CSV: C37_29604 /DEF=Section:9 Reversed BEST NR:BAB86932.1 2e-61 glucosyltransferase-14 [Vigna angularis] /REP_ORG=Citrus
red or far-red light signaling pathway	Cit.6804.1.S1_at	AFFY CSV: C37_08968 /DEF=Section:2 Forward ESTs:2 BEST NR:AAB91983.1 6e-81 COP1 regulatory protein [Arabidopsis thaliana] ref|NP_180854.1| COP1 regulatory protein [Arabidopsis thaliana] pir||T01112 photomorphogenesi /REP_ORG=Citrus
	Cit.13265.1.S1_at	AFFY CSV: C37_17576 /DEF=Section:2 Forward ESTs:8 BEST NR:NP_568246.1 4e-66 bZIP protein HY5 (HY5) [Arabidopsis thaliana] sp|O24646|HY5_ARATH Protein HY5 (AtbZIP56) /REP_ORG=Citrus
	Cit.37192.1.S1_at	AFFY CSV: C37_43060 /DEF=Section:12 Forward BEST NR:NP_192249.1 3e-42 GH3 protein -related [Arabidopsis thaliana] pir||B85043 probable GH3-like protein [imported] - Arabidopsis thaliana /REP_ORG=Citrus
	Cit.27206.1.S1_at	AFFY CSV: C37_35472 /DEF=Section:10 Reversed BEST NR:AAB91983.1 5e-96 COP1 regulatory protein [Arabidopsis thaliana] ref|NP_180854.1| COP1 regulatory protein [Arabidopsis thaliana] pir||T01112 photomorphogenesi /REP_ORG=Citrus
	Cit.33855.1.S1_s_at	AFFY CSV: C37_26270 /DEF=Section:12 Forward BEST NR:AAM91817.1 1e-34 putative phytochrome A supressor spa1 protein [Arabidopsis thaliana] gb|AAK64180.1| putative phytochrome A supressor spa1 protein [Arabidops /REP_ORG=Citrus
	Cit.33855.1.S1_at	AFFY CSV: C37_26270 /DEF=Section:12 Forward BEST NR:AAM91817.1 1e-34 putative phytochrome A supressor spa1 protein [Arabidopsis thaliana] gb|AAK64180.1| putative phytochrome A supressor spa1 protein [Arabidops /REP_ORG=Citrus
response to red or far red light	Cit.6804.1.S1_at	AFFY CSV: C37_08968 /DEF=Section:2 Forward ESTs:2 BEST NR:AAB91983.1 6e-81 COP1 regulatory protein [Arabidopsis thaliana] ref|NP_180854.1| COP1 regulatory protein [Arabidopsis thaliana] pir||T01112 photomorphogenesi /REP_ORG=Citrus
	Cit.13265.1.S1_at	AFFY CSV: C37_17576 /DEF=Section:2 Forward ESTs:8 BEST NR:NP_568246.1 4e-66 bZIP protein HY5 (HY5) [Arabidopsis thaliana] sp|O24646|HY5_ARATH Protein HY5 (AtbZIP56) /REP_ORG=Citrus
	Cit.13287.1.S1_s_at	AFFY CSV: C37_17605 /DEF=Section:2 Forward ESTs:5 BEST NR:AAC33235.1 1e-115 putative cytochrome P450 [Arabidopsis thaliana] ref|NP_180473.1| cytochrome P450 family protein [Arabidopsis thaliana] pir||T02739 probable /REP_ORG=Citrus
	Cit.14457.1.S1_s_at	AFFY CSV: C37_19164 /DEF=Section:2 Forward ESTs:3 BEST NR:BAB10046.1 1e-108 unnamed protein product [Arabidopsis thaliana] /REP_ORG=Citrus
	Cit.374.1.S1_s_at	AFFY CSV: C37_00467 /DEF=Section:2 Forward ESTs:13 BEST NR:AAR09170.1 1e-126 alpha-expansin 3 [Populus tremula x Populus tremuloides] /REP_ORG=Citrus
	Cit.37192.1.S1_at	AFFY CSV: C37_43060 /DEF=Section:12 Forward BEST NR:NP_192249.1 3e-42 GH3 protein -related [Arabidopsis thaliana] pir||B85043 probable GH3-like protein [imported] - Arabidopsis thaliana /REP_ORG=Citrus
	Cit.27206.1.S1_at	AFFY CSV: C37_35472 /DEF=Section:10 Reversed BEST NR:AAB91983.1 5e-96 COP1 regulatory protein [Arabidopsis thaliana] ref|NP_180854.1| COP1 regulatory protein [Arabidopsis thaliana] pir||T01112 photomorphogenesi /REP_ORG=Citrus
	Cit.33855.1.S1_s_at	AFFY CSV: C37_26270 /DEF=Section:12 Forward BEST NR:AAM91817.1 1e-34 putative phytochrome A supressor spa1 protein [Arabidopsis thaliana] gb|AAK64180.1| putative phytochrome A supressor spa1 protein [Arabidops /REP_ORG=Citrus
	Cit.33855.1.S1_at	AFFY CSV: C37_26270 /DEF=Section:12 Forward BEST NR:AAM91817.1 1e-34 putative phytochrome A supressor spa1 protein [Arabidopsis thaliana] gb|AAK64180.1| putative phytochrome A supressor spa1 protein [Arabidops /REP_ORG=Citrus
alkaloid biosynthetic process	Cit.5658.1.S1_at	AFFY CSV: C37_07226 /DEF=Section:2 Forward ESTs:4 BEST NR:NP_181661.1 3e-77 strictosidine synthase family protein [Arabidopsis thaliana] pir||A84840 probable strictosidine synthase [imported] - Arabidopsis thaliana /REP_ORG=Citrus
	Cit.16701.1.S1_at	AFFY CSV: C37_22732 /DEF=Section:2 Forward ESTs:2 BEST NR:CAD62568.1 5e-29 putative tropinone reductase [Calystegia sepium] /REP_ORG=Citrus
	Cit.13816.1.S1_s_at	AFFY CSV: C37_18284 /DEF=Section:2 Forward ESTs:3 BEST NR:CAC34420.1 8e-88 tropinone reductase I [Solanum tuberosum] /REP_ORG=Citrus
	Cit.18001.1.S1_at	AFFY CSV: C37_18080 /DEF=Section:3 Forward ESTs:6 BEST NR:AAG60665.1 1e-116 tyrosine/dopa decarboxylase [Thalictrum flavum subsp. glaucum] /REP_ORG=Citrus
	Cit.16701.1.S1_s_at	AFFY CSV: C37_22732 /DEF=Section:2 Forward ESTs:2 BEST NR:CAD62568.1 5e-29 putative tropinone reductase [Calystegia sepium] /REP_ORG=Citrus
	Cit.30349.1.S1_at	AFFY CSV: C37_10591 /DEF=Section:11 Forward BEST NR:NP_998544.1 1e-42 zgc:66329 [Danio rerio] gb|AAH54684.1| Zgc:66329 [Danio rerio] /REP_ORG=Citrus
alkaloid metabolic process	Cit.12748.1.S1_s_at	AFFY CSV: C37_16941 /DEF=Section:2 Forward ESTs:7 BEST NR:AAR86689.1 1e-124 fructose-bisphosphate aldolase [Glycine max] /REP_ORG=Citrus
	Cit.16701.1.S1_s_at	AFFY CSV: C37_22732 /DEF=Section:2 Forward ESTs:2 BEST NR:CAD62568.1 5e-29 putative tropinone reductase [Calystegia sepium] /REP_ORG=Citrus
	Cit.5658.1.S1_at	AFFY CSV: C37_07226 /DEF=Section:2 Forward ESTs:4 BEST NR:NP_181661.1 3e-77 strictosidine synthase family protein [Arabidopsis thaliana] pir||A84840 probable strictosidine synthase [imported] - Arabidopsis thaliana /REP_ORG=Citrus
	Cit.16701.1.S1_at	AFFY CSV: C37_22732 /DEF=Section:2 Forward ESTs:2 BEST NR:CAD62568.1 5e-29 putative tropinone reductase [Calystegia sepium] /REP_ORG=Citrus
	Cit.21653.1.S1_at	AFFY CSV: C37_25258 /DEF=Section:9 Reversed BEST NR:CAA71408.1 2e-22 homologous to plastidic aldolases [Solanum tuberosum] pir||T07418 probable fructose-bisphosphate aldolase (EC 4.1.2.13) precursor
	Cit.13816.1.S1_s_at	AFFY CSV: C37_18284 /DEF=Section:2 Forward ESTs:3 BEST NR:CAC34420.1 8e-88 tropinone reductase I [Solanum tuberosum] /REP_ORG=Citrus
	Cit.18001.1.S1_at	AFFY CSV: C37_18080 /DEF=Section:3 Forward ESTs:6 BEST NR:AAG60665.1 1e-116 tyrosine/dopa decarboxylase [Thalictrum flavum subsp. glaucum] /REP_ORG=Citrus
	Cit.26163.1.S1_at	AFFY CSV: C37_32690 /DEF=Section:10 Reversed BEST NR:NP_568304.1 1e-79 L-aspartate oxidase family protein [Arabidopsis thaliana] gb|AAK73984.1| AT5g14760/T9L3_60 [Arabidopsis thaliana] /REP_ORG=Citrus
	Cit.3351.1.S1_s_at	AFFY CSV: C37_04237 /DEF=Section:2 Forward ESTs:6 BEST NR:AAD25541.1 1e-138 fructose-1
	Cit.30349.1.S1_at	AFFY CSV: C37_10591 /DEF=Section:11 Forward BEST NR:NP_998544.1 1e-42 zgc:66329 [Danio rerio] gb|AAH54684.1| Zgc:66329 [Danio rerio] /REP_ORG=Citrus
aromatic compound biosynthetic process	Cit.28372.1.S1_at	AFFY CSV: C37_39039 /DEF=Section:10 Reversed BEST NR:AAP04064.1 1e-07 putative cinnamoyl-CoA reductase [Arabidopsis thaliana] gb|AAO64184.1| putative cinnamoyl-CoA reductase [Arabidopsis thaliana] gb|AAC78522.1 /REP_ORG=Citrus
	Cit.12818.1.S1_at	AFFY CSV: C37_17031 /DEF=Section:2 Forward ESTs:4 BEST NR:CAD47830.1 9e-64 hydroxycinnamoyl transferase [Nicotiana tabacum] /REP_ORG=Citrus
	Cit.5658.1.S1_at	AFFY CSV: C37_07226 /DEF=Section:2 Forward ESTs:4 BEST NR:NP_181661.1 3e-77 strictosidine synthase family protein [Arabidopsis thaliana] pir||A84840 probable strictosidine synthase [imported] - Arabidopsis thaliana /REP_ORG=Citrus
	Cit.14131.1.S1_at	AFFY CSV: C37_18708 /DEF=Section:2 Forward ESTs:6 BEST NR:NP_189600.1 2e-44 transferase family protein [Arabidopsis thaliana] dbj|BAB01191.1| anthocyanin 5-aromatic acyltransferase-like protein [Arabidopsis /REP_ORG=Citrus
	Cit.6322.1.S1_at	AFFY CSV: C37_08197 /DEF=Section:2 Forward ESTs:2 BEST NR:CAA54612.1 3e-73 UTP-glucose glucosyltransferase [Manihot esculenta] sp|Q40287|UFO5_MANES Flavonol 3-O-glucosyltransferase 5 (UDP-glucose flavonoid 3-O-gluco /REP_ORG=Citrus
	Cit.10824.1.S1_at	AFFY CSV: C37_14526 /DEF=Section:2 Forward ESTs:20 BEST NR:Q43716 1e-111 Flavonol 3-O-glucosyltransferase (UDP-glucose flavonoid 3-O-glucosyltransferase) (Anthocyanin rhamnosyl /REP_ORG=Citrus
	Cit.13882.1.S1_s_at	AFFY CSV: C37_18376 /DEF=Section:2 Forward ESTs:3 BEST NR:AAS00612.1 7e-97 UDP-glucose-flavonoid-3-O-glucosyl transferase [Citrus sinensis] /REP_ORG=Citrus
	Cit.871.1.S1_s_at	AFFY CSV: C37_01100 /DEF=Section:2 Forward ESTs:31 BEST NR:Q9ZWQ9 1e-146 Flavonol synthase (FLS) (CitFLS) dbj|BAA36554.1| flavonol synthase [Citrus unshiu] /REP_ORG=Citrus
	Cit.10353.1.S1_at	AFFY CSV: C37_13940 /DEF=Section:2 Forward ESTs:31 BEST NR:O48922 1e-121 Cytochrome P450 98A2 gb|AAB94587.1| CYP98A2p [Glycine max] pir||T05937 cytochrome P450 monooxygenase 98A2p - soybean /REP_ORG=Citrus
	Cit.30458.1.S1_s_at	AFFY CSV: C37_11774 /DEF=Section:11 Forward BEST NR:Q9XJ57 1e-160 Chalcone synthase 2 (Naringenin-chalcone synthase 2) dbj|BAA81664.1| chalcone synthase [Citrus sinensis] /REP_ORG=Citrus
	Cit.17011.1.S1_s_at	AFFY CSV: C37_01399 /DEF=Section:3 Forward ESTs:3 BEST NR:NP_568154.1 8e-74 chalcone-flavanone isomerase family protein [Arabidopsis thaliana] ref|NP_850770.1| chalcone-flavanone isomerase family protein [Arabidopsis /REP_ORG=Citrus
	Cit.30567.1.S1_at	AFFY CSV: C37_13939 /DEF=Section:11 Forward BEST NR:O48922 2e-71 Cytochrome P450 98A2 gb|AAB94587.1| CYP98A2p [Glycine max] pir||T05937 cytochrome P450 monooxygenase 98A2p - soybean /REP_ORG=Citrus
	Cit.21962.1.S1_at	AFFY CSV: C37_29604 /DEF=Section:9 Reversed BEST NR:BAB86932.1 2e-61 glucosyltransferase-14 [Vigna angularis] /REP_ORG=Citrus
	Cit.11987.1.S1_s_at	AFFY CSV: C37_15975 /DEF=Section:2 Forward ESTs:8 BEST NR:AAC24504.1 1e-121 4-coumarate:CoA ligase [Populus tremuloides] pir||T08075 4-coumarate-CoA ligase (EC 6.2.1.12) (clone 4CL2) [validated] - quaking aspen /REP_ORG=Citrus
	Cit.30349.1.S1_at	AFFY CSV: C37_10591 /DEF=Section:11 Forward BEST NR:NP_998544.1 1e-42 zgc:66329 [Danio rerio] gb|AAH54684.1| Zgc:66329 [Danio rerio] /REP_ORG=Citrus
red, far-red light phototransduction	Cit.37192.1.S1_at	AFFY CSV: C37_43060 /DEF=Section:12 Forward BEST NR:NP_192249.1 3e-42 GH3 protein -related [Arabidopsis thaliana] pir||B85043 probable GH3-like protein [imported] - Arabidopsis thaliana /REP_ORG=Citrus
	Cit.6804.1.S1_at	AFFY CSV: C37_08968 /DEF=Section:2 Forward ESTs:2 BEST NR:AAB91983.1 6e-81 COP1 regulatory protein [Arabidopsis thaliana] ref|NP_180854.1| COP1 regulatory protein [Arabidopsis thaliana] pir||T01112 photomorphogenesi /REP_ORG=Citrus
	Cit.33855.1.S1_s_at	AFFY CSV: C37_26270 /DEF=Section:12 Forward BEST NR:AAM91817.1 1e-34 putative phytochrome A supressor spa1 protein [Arabidopsis thaliana] gb|AAK64180.1| putative phytochrome A supressor spa1 protein [Arabidops /REP_ORG=Citrus
	Cit.33855.1.S1_at	AFFY CSV: C37_26270 /DEF=Section:12 Forward BEST NR:AAM91817.1 1e-34 putative phytochrome A supressor spa1 protein [Arabidopsis thaliana] gb|AAK64180.1| putative phytochrome A supressor spa1 protein [Arabidops /REP_ORG=Citrus
	Cit.27206.1.S1_at	AFFY CSV: C37_35472 /DEF=Section:10 Reversed BEST NR:AAB91983.1 5e-96 COP1 regulatory protein [Arabidopsis thaliana] ref|NP_180854.1| COP1 regulatory protein [Arabidopsis thaliana] pir||T01112 photomorphogenesi /REP_ORG=Citrus
detection of light stimulus	Cit.37192.1.S1_at	AFFY CSV: C37_43060 /DEF=Section:12 Forward BEST NR:NP_192249.1 3e-42 GH3 protein -related [Arabidopsis thaliana] pir||B85043 probable GH3-like protein [imported] - Arabidopsis thaliana /REP_ORG=Citrus
	Cit.6804.1.S1_at	AFFY CSV: C37_08968 /DEF=Section:2 Forward ESTs:2 BEST NR:AAB91983.1 6e-81 COP1 regulatory protein [Arabidopsis thaliana] ref|NP_180854.1| COP1 regulatory protein [Arabidopsis thaliana] pir||T01112 photomorphogenesi /REP_ORG=Citrus
	Cit.33855.1.S1_s_at	AFFY CSV: C37_26270 /DEF=Section:12 Forward BEST NR:AAM91817.1 1e-34 putative phytochrome A supressor spa1 protein [Arabidopsis thaliana] gb|AAK64180.1| putative phytochrome A supressor spa1 protein [Arabidops /REP_ORG=Citrus
	Cit.33855.1.S1_at	AFFY CSV: C37_26270 /DEF=Section:12 Forward BEST NR:AAM91817.1 1e-34 putative phytochrome A supressor spa1 protein [Arabidopsis thaliana] gb|AAK64180.1| putative phytochrome A supressor spa1 protein [Arabidops /REP_ORG=Citrus
	Cit.27206.1.S1_at	AFFY CSV: C37_35472 /DEF=Section:10 Reversed BEST NR:AAB91983.1 5e-96 COP1 regulatory protein [Arabidopsis thaliana] ref|NP_180854.1| COP1 regulatory protein [Arabidopsis thaliana] pir||T01112 photomorphogenesi /REP_ORG=Citrus
phototransduction	Cit.37192.1.S1_at	AFFY CSV: C37_43060 /DEF=Section:12 Forward BEST NR:NP_192249.1 3e-42 GH3 protein -related [Arabidopsis thaliana] pir||B85043 probable GH3-like protein [imported] - Arabidopsis thaliana /REP_ORG=Citrus
	Cit.6804.1.S1_at	AFFY CSV: C37_08968 /DEF=Section:2 Forward ESTs:2 BEST NR:AAB91983.1 6e-81 COP1 regulatory protein [Arabidopsis thaliana] ref|NP_180854.1| COP1 regulatory protein [Arabidopsis thaliana] pir||T01112 photomorphogenesi /REP_ORG=Citrus
	Cit.33855.1.S1_s_at	AFFY CSV: C37_26270 /DEF=Section:12 Forward BEST NR:AAM91817.1 1e-34 putative phytochrome A supressor spa1 protein [Arabidopsis thaliana] gb|AAK64180.1| putative phytochrome A supressor spa1 protein [Arabidops /REP_ORG=Citrus
	Cit.33855.1.S1_at	AFFY CSV: C37_26270 /DEF=Section:12 Forward BEST NR:AAM91817.1 1e-34 putative phytochrome A supressor spa1 protein [Arabidopsis thaliana] gb|AAK64180.1| putative phytochrome A supressor spa1 protein [Arabidops /REP_ORG=Citrus
	Cit.27206.1.S1_at	AFFY CSV: C37_35472 /DEF=Section:10 Reversed BEST NR:AAB91983.1 5e-96 COP1 regulatory protein [Arabidopsis thaliana] ref|NP_180854.1| COP1 regulatory protein [Arabidopsis thaliana] pir||T01112 photomorphogenesi /REP_ORG=Citrus
cellular aromatic compound metabolic process	Cit.6804.1.S1_at	AFFY CSV: C37_08968 /DEF=Section:2 Forward ESTs:2 BEST NR:AAB91983.1 6e-81 COP1 regulatory protein [Arabidopsis thaliana] ref|NP_180854.1| COP1 regulatory protein [Arabidopsis thaliana] pir||T01112 photomorphogenesi /REP_ORG=Citrus
	Cit.13265.1.S1_at	AFFY CSV: C37_17576 /DEF=Section:2 Forward ESTs:8 BEST NR:NP_568246.1 4e-66 bZIP protein HY5 (HY5) [Arabidopsis thaliana] sp|O24646|HY5_ARATH Protein HY5 (AtbZIP56) /REP_ORG=Citrus
	Cit.12818.1.S1_at	AFFY CSV: C37_17031 /DEF=Section:2 Forward ESTs:4 BEST NR:CAD47830.1 9e-64 hydroxycinnamoyl transferase [Nicotiana tabacum] /REP_ORG=Citrus
	Cit.10353.1.S1_at	AFFY CSV: C37_13940 /DEF=Section:2 Forward ESTs:31 BEST NR:O48922 1e-121 Cytochrome P450 98A2 gb|AAB94587.1| CYP98A2p [Glycine max] pir||T05937 cytochrome P450 monooxygenase 98A2p - soybean /REP_ORG=Citrus
	Cit.30349.1.S1_at	AFFY CSV: C37_10591 /DEF=Section:11 Forward BEST NR:NP_998544.1 1e-42 zgc:66329 [Danio rerio] gb|AAH54684.1| Zgc:66329 [Danio rerio] /REP_ORG=Citrus
	Cit.19927.1.S1_at	AFFY CSV: C37_29041 /DEF=Section:8 Forward BEST NR:NP_198668.1 1e-18 hydrolase
	Cit.28894.1.S1_at	AFFY CSV: C37_41553 /DEF=Section:10 Reversed BEST NR:CAD41916.2 2e-23 OSJNBa0033G05.17 [Oryza sativa (japonica cultivar-group)] ref|XP_474094.1| OSJNBa0033G05.17 [Oryza sativa (japonica cultivar-group)] /REP_ORG=Citrus
	Cit.17011.1.S1_s_at	AFFY CSV: C37_01399 /DEF=Section:3 Forward ESTs:3 BEST NR:NP_568154.1 8e-74 chalcone-flavanone isomerase family protein [Arabidopsis thaliana] ref|NP_850770.1| chalcone-flavanone isomerase family protein [Arabidopsis /REP_ORG=Citrus
	Cit.30567.1.S1_at	AFFY CSV: C37_13939 /DEF=Section:11 Forward BEST NR:O48922 2e-71 Cytochrome P450 98A2 gb|AAB94587.1| CYP98A2p [Glycine max] pir||T05937 cytochrome P450 monooxygenase 98A2p - soybean /REP_ORG=Citrus
	Cit.11987.1.S1_s_at	AFFY CSV: C37_15975 /DEF=Section:2 Forward ESTs:8 BEST NR:AAC24504.1 1e-121 4-coumarate:CoA ligase [Populus tremuloides] pir||T08075 4-coumarate-CoA ligase (EC 6.2.1.12) (clone 4CL2) [validated] - quaking aspen /REP_ORG=Citrus
	Cit.14131.1.S1_at	AFFY CSV: C37_18708 /DEF=Section:2 Forward ESTs:6 BEST NR:NP_189600.1 2e-44 transferase family protein [Arabidopsis thaliana] dbj|BAB01191.1| anthocyanin 5-aromatic acyltransferase-like protein [Arabidopsis /REP_ORG=Citrus
	Cit.18247.1.S1_at	AFFY CSV: C37_21765 /DEF=Section:3 Forward ESTs:2 BEST NR:CAC82575.2 9e-58 phage-type RNA polymerase [Nicotiana sylvestris] /REP_ORG=Citrus
	Cit.10824.1.S1_at	AFFY CSV: C37_14526 /DEF=Section:2 Forward ESTs:20 BEST NR:Q43716 1e-111 Flavonol 3-O-glucosyltransferase (UDP-glucose flavonoid 3-O-glucosyltransferase) (Anthocyanin rhamnosyl /REP_ORG=Citrus
	Cit.30458.1.S1_s_at	AFFY CSV: C37_11774 /DEF=Section:11 Forward BEST NR:Q9XJ57 1e-160 Chalcone synthase 2 (Naringenin-chalcone synthase 2) dbj|BAA81664.1| chalcone synthase [Citrus sinensis] /REP_ORG=Citrus
	Cit.18001.1.S1_at	AFFY CSV: C37_18080 /DEF=Section:3 Forward ESTs:6 BEST NR:AAG60665.1 1e-116 tyrosine/dopa decarboxylase [Thalictrum flavum subsp. glaucum] /REP_ORG=Citrus
	Cit.27206.1.S1_at	AFFY CSV: C37_35472 /DEF=Section:10 Reversed BEST NR:AAB91983.1 5e-96 COP1 regulatory protein [Arabidopsis thaliana] ref|NP_180854.1| COP1 regulatory protein [Arabidopsis thaliana] pir||T01112 photomorphogenesi /REP_ORG=Citrus
	Cit.28372.1.S1_at	AFFY CSV: C37_39039 /DEF=Section:10 Reversed BEST NR:AAP04064.1 1e-07 putative cinnamoyl-CoA reductase [Arabidopsis thaliana] gb|AAO64184.1| putative cinnamoyl-CoA reductase [Arabidopsis thaliana] gb|AAC78522.1 /REP_ORG=Citrus
	Cit.5658.1.S1_at	AFFY CSV: C37_07226 /DEF=Section:2 Forward ESTs:4 BEST NR:NP_181661.1 3e-77 strictosidine synthase family protein [Arabidopsis thaliana] pir||A84840 probable strictosidine synthase [imported] - Arabidopsis thaliana /REP_ORG=Citrus
	Cit.6322.1.S1_at	AFFY CSV: C37_08197 /DEF=Section:2 Forward ESTs:2 BEST NR:CAA54612.1 3e-73 UTP-glucose glucosyltransferase [Manihot esculenta] sp|Q40287|UFO5_MANES Flavonol 3-O-glucosyltransferase 5 (UDP-glucose flavonoid 3-O-gluco /REP_ORG=Citrus
	Cit.13882.1.S1_s_at	AFFY CSV: C37_18376 /DEF=Section:2 Forward ESTs:3 BEST NR:AAS00612.1 7e-97 UDP-glucose-flavonoid-3-O-glucosyl transferase [Citrus sinensis] /REP_ORG=Citrus
	Cit.7995.1.S1_at	AFFY CSV: C37_10986 /DEF=Section:2 Forward ESTs:5 BEST NR:BAB11572.1 3e-48 sigma-like factor [Arabidopsis thaliana] dbj|BAA78109.1| RNA polymerase sigma subunit SigE [Arabidopsis thaliana] emb|CAA77213.1| sigma-like /REP_ORG=Citrus
	Cit.871.1.S1_s_at	AFFY CSV: C37_01100 /DEF=Section:2 Forward ESTs:31 BEST NR:Q9ZWQ9 1e-146 Flavonol synthase (FLS) (CitFLS) dbj|BAA36554.1| flavonol synthase [Citrus unshiu] /REP_ORG=Citrus
	Cit.21962.1.S1_at	AFFY CSV: C37_29604 /DEF=Section:9 Reversed BEST NR:BAB86932.1 2e-61 glucosyltransferase-14 [Vigna angularis] /REP_ORG=Citrus
detection of abiotic stimulus	Cit.37192.1.S1_at	AFFY CSV: C37_43060 /DEF=Section:12 Forward BEST NR:NP_192249.1 3e-42 GH3 protein -related [Arabidopsis thaliana] pir||B85043 probable GH3-like protein [imported] - Arabidopsis thaliana /REP_ORG=Citrus
	Cit.6804.1.S1_at	AFFY CSV: C37_08968 /DEF=Section:2 Forward ESTs:2 BEST NR:AAB91983.1 6e-81 COP1 regulatory protein [Arabidopsis thaliana] ref|NP_180854.1| COP1 regulatory protein [Arabidopsis thaliana] pir||T01112 photomorphogenesi /REP_ORG=Citrus
	Cit.33855.1.S1_s_at	AFFY CSV: C37_26270 /DEF=Section:12 Forward BEST NR:AAM91817.1 1e-34 putative phytochrome A supressor spa1 protein [Arabidopsis thaliana] gb|AAK64180.1| putative phytochrome A supressor spa1 protein [Arabidops /REP_ORG=Citrus
	Cit.33855.1.S1_at	AFFY CSV: C37_26270 /DEF=Section:12 Forward BEST NR:AAM91817.1 1e-34 putative phytochrome A supressor spa1 protein [Arabidopsis thaliana] gb|AAK64180.1| putative phytochrome A supressor spa1 protein [Arabidops /REP_ORG=Citrus
	Cit.27206.1.S1_at	AFFY CSV: C37_35472 /DEF=Section:10 Reversed BEST NR:AAB91983.1 5e-96 COP1 regulatory protein [Arabidopsis thaliana] ref|NP_180854.1| COP1 regulatory protein [Arabidopsis thaliana] pir||T01112 photomorphogenesi /REP_ORG=Citrus
detection of external stimulus	Cit.37192.1.S1_at	AFFY CSV: C37_43060 /DEF=Section:12 Forward BEST NR:NP_192249.1 3e-42 GH3 protein -related [Arabidopsis thaliana] pir||B85043 probable GH3-like protein [imported] - Arabidopsis thaliana /REP_ORG=Citrus
	Cit.6804.1.S1_at	AFFY CSV: C37_08968 /DEF=Section:2 Forward ESTs:2 BEST NR:AAB91983.1 6e-81 COP1 regulatory protein [Arabidopsis thaliana] ref|NP_180854.1| COP1 regulatory protein [Arabidopsis thaliana] pir||T01112 photomorphogenesi /REP_ORG=Citrus
	Cit.33855.1.S1_s_at	AFFY CSV: C37_26270 /DEF=Section:12 Forward BEST NR:AAM91817.1 1e-34 putative phytochrome A supressor spa1 protein [Arabidopsis thaliana] gb|AAK64180.1| putative phytochrome A supressor spa1 protein [Arabidops /REP_ORG=Citrus
	Cit.33855.1.S1_at	AFFY CSV: C37_26270 /DEF=Section:12 Forward BEST NR:AAM91817.1 1e-34 putative phytochrome A supressor spa1 protein [Arabidopsis thaliana] gb|AAK64180.1| putative phytochrome A supressor spa1 protein [Arabidops /REP_ORG=Citrus
	Cit.27206.1.S1_at	AFFY CSV: C37_35472 /DEF=Section:10 Reversed BEST NR:AAB91983.1 5e-96 COP1 regulatory protein [Arabidopsis thaliana] ref|NP_180854.1| COP1 regulatory protein [Arabidopsis thaliana] pir||T01112 photomorphogenesi /REP_ORG=Citrus
cellular response to stimulus	Cit.6804.1.S1_at	AFFY CSV: C37_08968 /DEF=Section:2 Forward ESTs:2 BEST NR:AAB91983.1 6e-81 COP1 regulatory protein [Arabidopsis thaliana] ref|NP_180854.1| COP1 regulatory protein [Arabidopsis thaliana] pir||T01112 photomorphogenesi /REP_ORG=Citrus
	Cit.13265.1.S1_at	AFFY CSV: C37_17576 /DEF=Section:2 Forward ESTs:8 BEST NR:NP_568246.1 4e-66 bZIP protein HY5 (HY5) [Arabidopsis thaliana] sp|O24646|HY5_ARATH Protein HY5 (AtbZIP56) /REP_ORG=Citrus
	Cit.15620.1.S1_at	AFFY CSV: C37_20909 /DEF=Section:2 Forward ESTs:2 BEST NR:AAO39667.1 4e-34 UDP-sulfoquinovose synthase SQD1 [Spinacia oleracea] sp|Q84KI6|SQD1_SPIOL UDP-sulfoquinovose synthase
	Cit.31612.1.S1_s_at	AFFY CSV: C37_23051 /DEF=Section:12 Forward BEST NR:Q84KI6 1e-91 UDP-sulfoquinovose synthase
	Cit.26126.1.S1_at	AFFY CSV: C37_32587 /DEF=Section:10 Reversed BEST NR:AAF20221.1 4e-31 putative RNA-binding protein [Arabidopsis thaliana] /REP_ORG=Citrus
	Cit.15228.1.S1_at	AFFY CSV: C37_20272 /DEF=Section:2 Forward ESTs:3 BEST NR:AAM65925.1 2e-35 putative ethylene response element binding protein (EREBP) [Arabidopsis thaliana] /REP_ORG=Citrus
	Cit.20519.1.S1_at	AFFY CSV: C37_43026 /DEF=Section:8 Forward BEST NR:AAQ10672.1 1e-34 type II CPD photolyase [Stellaria longipes] /REP_ORG=Citrus
	Cit.31299.1.S1_at	AFFY CSV: C37_21642 /DEF=Section:11 Forward BEST NR:NP_199628.1 2e-37 F-box family protein [Arabidopsis thaliana] dbj|BAA96997.1| unnamed protein product [Arabidopsis thaliana] /REP_ORG=Citrus
	Cit.3166.1.S1_s_at	AFFY CSV: C37_04000 /DEF=Section:2 Forward ESTs:4 BEST NR:AAM65209.1 8e-39 unknown [Arabidopsis thaliana] /REP_ORG=Citrus
	Cit.27139.1.S1_s_at	AFFY CSV: C37_35334 /DEF=Section:10 Reversed BEST NR:AAM91238.1 7e-49 DNA binding protein TGA1a-like protein [Arabidopsis thaliana] dbj|BAB11657.1| DNA binding protein TGA1a homolog [Arabidopsis thaliana] gb|AA /REP_ORG=Citrus
	Cit.7667.1.S1_at	AFFY CSV: C37_10440 /DEF=Section:2 Forward ESTs:2 BEST NR:G86270 2e-42 hypothetical protein F21F23.17 - Arabidopsis thaliana ref|NP_563933.1| expressed protein [Arabidopsis thaliana] gb|AAF81300.1| Strong simila /REP_ORG=Citrus
	Cit.37192.1.S1_at	AFFY CSV: C37_43060 /DEF=Section:12 Forward BEST NR:NP_192249.1 3e-42 GH3 protein -related [Arabidopsis thaliana] pir||B85043 probable GH3-like protein [imported] - Arabidopsis thaliana /REP_ORG=Citrus
	Cit.27206.1.S1_at	AFFY CSV: C37_35472 /DEF=Section:10 Reversed BEST NR:AAB91983.1 5e-96 COP1 regulatory protein [Arabidopsis thaliana] ref|NP_180854.1| COP1 regulatory protein [Arabidopsis thaliana] pir||T01112 photomorphogenesi /REP_ORG=Citrus
	Cit.33855.1.S1_s_at	AFFY CSV: C37_26270 /DEF=Section:12 Forward BEST NR:AAM91817.1 1e-34 putative phytochrome A supressor spa1 protein [Arabidopsis thaliana] gb|AAK64180.1| putative phytochrome A supressor spa1 protein [Arabidops /REP_ORG=Citrus
	Cit.32404.1.S1_at	AFFY CSV: C37_24042 /DEF=Section:12 Forward BEST NR:BAD46272.1 1e-46 deoxyribodipyrimidine photolyase family protein-like [Oryza sativa (japonica cultivar-group)] dbj|BAD46025.1| deoxyribodipyrimidine photolya /REP_ORG=Citrus
	Cit.33855.1.S1_at	AFFY CSV: C37_26270 /DEF=Section:12 Forward BEST NR:AAM91817.1 1e-34 putative phytochrome A supressor spa1 protein [Arabidopsis thaliana] gb|AAK64180.1| putative phytochrome A supressor spa1 protein [Arabidops /REP_ORG=Citrus
	Cit.24994.1.S1_at	AFFY CSV: C37_23519 /DEF=Section:10 Reversed BEST NR:CAB96681.1 3e-49 non-phototropic hypocotyl 3-like protein [Arabidopsis thaliana] ref|NP_196587.1| phototropic-responsive protein
cellular amino acid derivative biosynthetic process	Cit.28372.1.S1_at	AFFY CSV: C37_39039 /DEF=Section:10 Reversed BEST NR:AAP04064.1 1e-07 putative cinnamoyl-CoA reductase [Arabidopsis thaliana] gb|AAO64184.1| putative cinnamoyl-CoA reductase [Arabidopsis thaliana] gb|AAC78522.1 /REP_ORG=Citrus
	Cit.12818.1.S1_at	AFFY CSV: C37_17031 /DEF=Section:2 Forward ESTs:4 BEST NR:CAD47830.1 9e-64 hydroxycinnamoyl transferase [Nicotiana tabacum] /REP_ORG=Citrus
	Cit.14131.1.S1_at	AFFY CSV: C37_18708 /DEF=Section:2 Forward ESTs:6 BEST NR:NP_189600.1 2e-44 transferase family protein [Arabidopsis thaliana] dbj|BAB01191.1| anthocyanin 5-aromatic acyltransferase-like protein [Arabidopsis /REP_ORG=Citrus
	Cit.6322.1.S1_at	AFFY CSV: C37_08197 /DEF=Section:2 Forward ESTs:2 BEST NR:CAA54612.1 3e-73 UTP-glucose glucosyltransferase [Manihot esculenta] sp|Q40287|UFO5_MANES Flavonol 3-O-glucosyltransferase 5 (UDP-glucose flavonoid 3-O-gluco /REP_ORG=Citrus
	Cit.10824.1.S1_at	AFFY CSV: C37_14526 /DEF=Section:2 Forward ESTs:20 BEST NR:Q43716 1e-111 Flavonol 3-O-glucosyltransferase (UDP-glucose flavonoid 3-O-glucosyltransferase) (Anthocyanin rhamnosyl /REP_ORG=Citrus
	Cit.13882.1.S1_s_at	AFFY CSV: C37_18376 /DEF=Section:2 Forward ESTs:3 BEST NR:AAS00612.1 7e-97 UDP-glucose-flavonoid-3-O-glucosyl transferase [Citrus sinensis] /REP_ORG=Citrus
	Cit.871.1.S1_s_at	AFFY CSV: C37_01100 /DEF=Section:2 Forward ESTs:31 BEST NR:Q9ZWQ9 1e-146 Flavonol synthase (FLS) (CitFLS) dbj|BAA36554.1| flavonol synthase [Citrus unshiu] /REP_ORG=Citrus
	Cit.10353.1.S1_at	AFFY CSV: C37_13940 /DEF=Section:2 Forward ESTs:31 BEST NR:O48922 1e-121 Cytochrome P450 98A2 gb|AAB94587.1| CYP98A2p [Glycine max] pir||T05937 cytochrome P450 monooxygenase 98A2p - soybean /REP_ORG=Citrus
	Cit.30458.1.S1_s_at	AFFY CSV: C37_11774 /DEF=Section:11 Forward BEST NR:Q9XJ57 1e-160 Chalcone synthase 2 (Naringenin-chalcone synthase 2) dbj|BAA81664.1| chalcone synthase [Citrus sinensis] /REP_ORG=Citrus
	Cit.17011.1.S1_s_at	AFFY CSV: C37_01399 /DEF=Section:3 Forward ESTs:3 BEST NR:NP_568154.1 8e-74 chalcone-flavanone isomerase family protein [Arabidopsis thaliana] ref|NP_850770.1| chalcone-flavanone isomerase family protein [Arabidopsis /REP_ORG=Citrus
	Cit.30567.1.S1_at	AFFY CSV: C37_13939 /DEF=Section:11 Forward BEST NR:O48922 2e-71 Cytochrome P450 98A2 gb|AAB94587.1| CYP98A2p [Glycine max] pir||T05937 cytochrome P450 monooxygenase 98A2p - soybean /REP_ORG=Citrus
	Cit.21962.1.S1_at	AFFY CSV: C37_29604 /DEF=Section:9 Reversed BEST NR:BAB86932.1 2e-61 glucosyltransferase-14 [Vigna angularis] /REP_ORG=Citrus
	Cit.11987.1.S1_s_at	AFFY CSV: C37_15975 /DEF=Section:2 Forward ESTs:8 BEST NR:AAC24504.1 1e-121 4-coumarate:CoA ligase [Populus tremuloides] pir||T08075 4-coumarate-CoA ligase (EC 6.2.1.12) (clone 4CL2) [validated] - quaking aspen /REP_ORG=Citrus
	Cit.30349.1.S1_at	AFFY CSV: C37_10591 /DEF=Section:11 Forward BEST NR:NP_998544.1 1e-42 zgc:66329 [Danio rerio] gb|AAH54684.1| Zgc:66329 [Danio rerio] /REP_ORG=Citrus
lignin biosynthetic process	Cit.28372.1.S1_at	AFFY CSV: C37_39039 /DEF=Section:10 Reversed BEST NR:AAP04064.1 1e-07 putative cinnamoyl-CoA reductase [Arabidopsis thaliana] gb|AAO64184.1| putative cinnamoyl-CoA reductase [Arabidopsis thaliana] gb|AAC78522.1 /REP_ORG=Citrus
	Cit.12818.1.S1_at	AFFY CSV: C37_17031 /DEF=Section:2 Forward ESTs:4 BEST NR:CAD47830.1 9e-64 hydroxycinnamoyl transferase [Nicotiana tabacum] /REP_ORG=Citrus
	Cit.10353.1.S1_at	AFFY CSV: C37_13940 /DEF=Section:2 Forward ESTs:31 BEST NR:O48922 1e-121 Cytochrome P450 98A2 gb|AAB94587.1| CYP98A2p [Glycine max] pir||T05937 cytochrome P450 monooxygenase 98A2p - soybean /REP_ORG=Citrus
	Cit.6322.1.S1_at	AFFY CSV: C37_08197 /DEF=Section:2 Forward ESTs:2 BEST NR:CAA54612.1 3e-73 UTP-glucose glucosyltransferase [Manihot esculenta] sp|Q40287|UFO5_MANES Flavonol 3-O-glucosyltransferase 5 (UDP-glucose flavonoid 3-O-gluco /REP_ORG=Citrus
	Cit.30567.1.S1_at	AFFY CSV: C37_13939 /DEF=Section:11 Forward BEST NR:O48922 2e-71 Cytochrome P450 98A2 gb|AAB94587.1| CYP98A2p [Glycine max] pir||T05937 cytochrome P450 monooxygenase 98A2p - soybean /REP_ORG=Citrus
	Cit.11987.1.S1_s_at	AFFY CSV: C37_15975 /DEF=Section:2 Forward ESTs:8 BEST NR:AAC24504.1 1e-121 4-coumarate:CoA ligase [Populus tremuloides] pir||T08075 4-coumarate-CoA ligase (EC 6.2.1.12) (clone 4CL2) [validated] - quaking aspen /REP_ORG=Citrus
lignin metabolic process	Cit.28372.1.S1_at	AFFY CSV: C37_39039 /DEF=Section:10 Reversed BEST NR:AAP04064.1 1e-07 putative cinnamoyl-CoA reductase [Arabidopsis thaliana] gb|AAO64184.1| putative cinnamoyl-CoA reductase [Arabidopsis thaliana] gb|AAC78522.1 /REP_ORG=Citrus
	Cit.12818.1.S1_at	AFFY CSV: C37_17031 /DEF=Section:2 Forward ESTs:4 BEST NR:CAD47830.1 9e-64 hydroxycinnamoyl transferase [Nicotiana tabacum] /REP_ORG=Citrus
	Cit.10353.1.S1_at	AFFY CSV: C37_13940 /DEF=Section:2 Forward ESTs:31 BEST NR:O48922 1e-121 Cytochrome P450 98A2 gb|AAB94587.1| CYP98A2p [Glycine max] pir||T05937 cytochrome P450 monooxygenase 98A2p - soybean /REP_ORG=Citrus
	Cit.6322.1.S1_at	AFFY CSV: C37_08197 /DEF=Section:2 Forward ESTs:2 BEST NR:CAA54612.1 3e-73 UTP-glucose glucosyltransferase [Manihot esculenta] sp|Q40287|UFO5_MANES Flavonol 3-O-glucosyltransferase 5 (UDP-glucose flavonoid 3-O-gluco /REP_ORG=Citrus
	Cit.30567.1.S1_at	AFFY CSV: C37_13939 /DEF=Section:11 Forward BEST NR:O48922 2e-71 Cytochrome P450 98A2 gb|AAB94587.1| CYP98A2p [Glycine max] pir||T05937 cytochrome P450 monooxygenase 98A2p - soybean /REP_ORG=Citrus
	Cit.11987.1.S1_s_at	AFFY CSV: C37_15975 /DEF=Section:2 Forward ESTs:8 BEST NR:AAC24504.1 1e-121 4-coumarate:CoA ligase [Populus tremuloides] pir||T08075 4-coumarate-CoA ligase (EC 6.2.1.12) (clone 4CL2) [validated] - quaking aspen /REP_ORG=Citrus
cellular amino acid derivative metabolic process	Cit.28372.1.S1_at	AFFY CSV: C37_39039 /DEF=Section:10 Reversed BEST NR:AAP04064.1 1e-07 putative cinnamoyl-CoA reductase [Arabidopsis thaliana] gb|AAO64184.1| putative cinnamoyl-CoA reductase [Arabidopsis thaliana] gb|AAC78522.1 /REP_ORG=Citrus
	Cit.6804.1.S1_at	AFFY CSV: C37_08968 /DEF=Section:2 Forward ESTs:2 BEST NR:AAB91983.1 6e-81 COP1 regulatory protein [Arabidopsis thaliana] ref|NP_180854.1| COP1 regulatory protein [Arabidopsis thaliana] pir||T01112 photomorphogenesi /REP_ORG=Citrus
	Cit.12818.1.S1_at	AFFY CSV: C37_17031 /DEF=Section:2 Forward ESTs:4 BEST NR:CAD47830.1 9e-64 hydroxycinnamoyl transferase [Nicotiana tabacum] /REP_ORG=Citrus
	Cit.13265.1.S1_at	AFFY CSV: C37_17576 /DEF=Section:2 Forward ESTs:8 BEST NR:NP_568246.1 4e-66 bZIP protein HY5 (HY5) [Arabidopsis thaliana] sp|O24646|HY5_ARATH Protein HY5 (AtbZIP56) /REP_ORG=Citrus
	Cit.14131.1.S1_at	AFFY CSV: C37_18708 /DEF=Section:2 Forward ESTs:6 BEST NR:NP_189600.1 2e-44 transferase family protein [Arabidopsis thaliana] dbj|BAB01191.1| anthocyanin 5-aromatic acyltransferase-like protein [Arabidopsis /REP_ORG=Citrus
	Cit.30458.1.S1_s_at	AFFY CSV: C37_11774 /DEF=Section:11 Forward BEST NR:Q9XJ57 1e-160 Chalcone synthase 2 (Naringenin-chalcone synthase 2) dbj|BAA81664.1| chalcone synthase [Citrus sinensis] /REP_ORG=Citrus
	Cit.10824.1.S1_at	AFFY CSV: C37_14526 /DEF=Section:2 Forward ESTs:20 BEST NR:Q43716 1e-111 Flavonol 3-O-glucosyltransferase (UDP-glucose flavonoid 3-O-glucosyltransferase) (Anthocyanin rhamnosyl /REP_ORG=Citrus
	Cit.13882.1.S1_s_at	AFFY CSV: C37_18376 /DEF=Section:2 Forward ESTs:3 BEST NR:AAS00612.1 7e-97 UDP-glucose-flavonoid-3-O-glucosyl transferase [Citrus sinensis] /REP_ORG=Citrus
	Cit.871.1.S1_s_at	AFFY CSV: C37_01100 /DEF=Section:2 Forward ESTs:31 BEST NR:Q9ZWQ9 1e-146 Flavonol synthase (FLS) (CitFLS) dbj|BAA36554.1| flavonol synthase [Citrus unshiu] /REP_ORG=Citrus
	Cit.10353.1.S1_at	AFFY CSV: C37_13940 /DEF=Section:2 Forward ESTs:31 BEST NR:O48922 1e-121 Cytochrome P450 98A2 gb|AAB94587.1| CYP98A2p [Glycine max] pir||T05937 cytochrome P450 monooxygenase 98A2p - soybean /REP_ORG=Citrus
	Cit.6322.1.S1_at	AFFY CSV: C37_08197 /DEF=Section:2 Forward ESTs:2 BEST NR:CAA54612.1 3e-73 UTP-glucose glucosyltransferase [Manihot esculenta] sp|Q40287|UFO5_MANES Flavonol 3-O-glucosyltransferase 5 (UDP-glucose flavonoid 3-O-gluco /REP_ORG=Citrus
	Cit.27206.1.S1_at	AFFY CSV: C37_35472 /DEF=Section:10 Reversed BEST NR:AAB91983.1 5e-96 COP1 regulatory protein [Arabidopsis thaliana] ref|NP_180854.1| COP1 regulatory protein [Arabidopsis thaliana] pir||T01112 photomorphogenesi /REP_ORG=Citrus
	Cit.17011.1.S1_s_at	AFFY CSV: C37_01399 /DEF=Section:3 Forward ESTs:3 BEST NR:NP_568154.1 8e-74 chalcone-flavanone isomerase family protein [Arabidopsis thaliana] ref|NP_850770.1| chalcone-flavanone isomerase family protein [Arabidopsis /REP_ORG=Citrus
	Cit.30567.1.S1_at	AFFY CSV: C37_13939 /DEF=Section:11 Forward BEST NR:O48922 2e-71 Cytochrome P450 98A2 gb|AAB94587.1| CYP98A2p [Glycine max] pir||T05937 cytochrome P450 monooxygenase 98A2p - soybean /REP_ORG=Citrus
	Cit.21962.1.S1_at	AFFY CSV: C37_29604 /DEF=Section:9 Reversed BEST NR:BAB86932.1 2e-61 glucosyltransferase-14 [Vigna angularis] /REP_ORG=Citrus
	Cit.11987.1.S1_s_at	AFFY CSV: C37_15975 /DEF=Section:2 Forward ESTs:8 BEST NR:AAC24504.1 1e-121 4-coumarate:CoA ligase [Populus tremuloides] pir||T08075 4-coumarate-CoA ligase (EC 6.2.1.12) (clone 4CL2) [validated] - quaking aspen /REP_ORG=Citrus
	Cit.30349.1.S1_at	AFFY CSV: C37_10591 /DEF=Section:11 Forward BEST NR:NP_998544.1 1e-42 zgc:66329 [Danio rerio] gb|AAH54684.1| Zgc:66329 [Danio rerio] /REP_ORG=Citrus
response to abiotic stimulus	Cit.6804.1.S1_at	AFFY CSV: C37_08968 /DEF=Section:2 Forward ESTs:2 BEST NR:AAB91983.1 6e-81 COP1 regulatory protein [Arabidopsis thaliana] ref|NP_180854.1| COP1 regulatory protein [Arabidopsis thaliana] pir||T01112 photomorphogenesi /REP_ORG=Citrus
	Cit.17062.1.S1_s_at	AFFY CSV: C37_02577 /DEF=Section:3 Forward ESTs:2 BEST NR:AAS58518.1 2e-39 MYB transcription factor [Arabidopsis thaliana] /REP_ORG=Citrus
	Cit.13265.1.S1_at	AFFY CSV: C37_17576 /DEF=Section:2 Forward ESTs:8 BEST NR:NP_568246.1 4e-66 bZIP protein HY5 (HY5) [Arabidopsis thaliana] sp|O24646|HY5_ARATH Protein HY5 (AtbZIP56) /REP_ORG=Citrus
	Cit.13529.1.S1_s_at	AFFY CSV: C37_17907 /DEF=Section:2 Forward ESTs:5 BEST NR:AAC98029.1 9e-86 Strong similarity to gb|U20808 auxin-induced protein from Vigna radiata and a member of the zinc-binding dehydrogenase family PF|00107. EST /REP_ORG=Citrus
	Cit.17061.1.S1_s_at	AFFY CSV: C37_02576 /DEF=Section:3 Forward ESTs:3 BEST NR:AAS58518.1 2e-74 MYB transcription factor [Arabidopsis thaliana] /REP_ORG=Citrus
	Cit.26060.1.S1_at	AFFY CSV: C37_32358 /DEF=Section:10 Reversed BEST NR:AAL32038.1 7e-29 early light-induced protein-like protein [Retama raetam] /REP_ORG=Citrus
	Cit.3351.1.S1_s_at	AFFY CSV: C37_04237 /DEF=Section:2 Forward ESTs:6 BEST NR:AAD25541.1 1e-138 fructose-1
	Cit.11692.1.S1_s_at	AFFY CSV: C37_15596 /DEF=Section:2 Forward ESTs:4 BEST NR:P27774 1e-110 Phosphoribulokinase
	Cit.33855.1.S1_s_at	AFFY CSV: C37_26270 /DEF=Section:12 Forward BEST NR:AAM91817.1 1e-34 putative phytochrome A supressor spa1 protein [Arabidopsis thaliana] gb|AAK64180.1| putative phytochrome A supressor spa1 protein [Arabidops /REP_ORG=Citrus
	Cit.28142.1.S1_s_at	AFFY CSV: C37_38117 /DEF=Section:10 Reversed BEST NR:BAB62109.1 3e-85 CYP90D [Arabidopsis thaliana] gb|AAO50626.1| putative cytochrome P450 [Arabidopsis thaliana] gb|AAO42111.1| putative cytochrome P450 [Arabid /REP_ORG=Citrus
	Cit.20519.1.S1_at	AFFY CSV: C37_43026 /DEF=Section:8 Forward BEST NR:AAQ10672.1 1e-34 type II CPD photolyase [Stellaria longipes] /REP_ORG=Citrus
	Cit.13287.1.S1_s_at	AFFY CSV: C37_17605 /DEF=Section:2 Forward ESTs:5 BEST NR:AAC33235.1 1e-115 putative cytochrome P450 [Arabidopsis thaliana] ref|NP_180473.1| cytochrome P450 family protein [Arabidopsis thaliana] pir||T02739 probable /REP_ORG=Citrus
	Cit.37192.1.S1_at	AFFY CSV: C37_43060 /DEF=Section:12 Forward BEST NR:NP_192249.1 3e-42 GH3 protein -related [Arabidopsis thaliana] pir||B85043 probable GH3-like protein [imported] - Arabidopsis thaliana /REP_ORG=Citrus
	Cit.374.1.S1_s_at	AFFY CSV: C37_00467 /DEF=Section:2 Forward ESTs:13 BEST NR:AAR09170.1 1e-126 alpha-expansin 3 [Populus tremula x Populus tremuloides] /REP_ORG=Citrus
	Cit.27206.1.S1_at	AFFY CSV: C37_35472 /DEF=Section:10 Reversed BEST NR:AAB91983.1 5e-96 COP1 regulatory protein [Arabidopsis thaliana] ref|NP_180854.1| COP1 regulatory protein [Arabidopsis thaliana] pir||T01112 photomorphogenesi /REP_ORG=Citrus
	Cit.33855.1.S1_at	AFFY CSV: C37_26270 /DEF=Section:12 Forward BEST NR:AAM91817.1 1e-34 putative phytochrome A supressor spa1 protein [Arabidopsis thaliana] gb|AAK64180.1| putative phytochrome A supressor spa1 protein [Arabidops /REP_ORG=Citrus
	Cit.275.1.S1_s_at	AFFY CSV: C37_00345 /DEF=Section:2 Forward ESTs:2 BEST NR:NP_188923.1 4e-53 chlorophyll A-B binding family protein / early light-induced protein (ELIP) [Arabidopsis thaliana] /REP_ORG=Citrus
	Cit.10912.1.S1_s_at	AFFY CSV: C37_14635 /DEF=Section:2 Forward ESTs:12 BEST NR:AAB71227.1 1e-109 Ca+2-binding EF hand protein [Glycine max] pir||T07092 Ca+2-binding EF hand protein homolog PM13 - soybean /REP_ORG=Citrus
	Cit.7266.1.S1_at	AFFY CSV: C37_09807 /DEF=Section:2 Forward ESTs:2 BEST NR:CAB89335.1 1e-34 FtsH-like protein Pftf precursor-like [Arabidopsis thaliana] ref|NP_568311.1| FtsH protease
	Cit.25203.1.S1_at	AFFY CSV: C37_29716 /DEF=Section:10 Reversed BEST NR:BAC81420.1 2e-92 nitrate transporter [Prunus persica] /REP_ORG=Citrus
	Cit.19520.1.S1_s_at	AFFY CSV: C37_28244 /DEF=Section:8 Forward BEST NR:Q9XJ57 5e-87 Chalcone synthase 2 (Naringenin-chalcone synthase 2) dbj|BAA81664.1| chalcone synthase [Citrus sinensis] /REP_ORG=Citrus
	Cit.5165.1.S1_at	AFFY CSV: C37_06542 /DEF=Section:2 Forward ESTs:6 BEST NR:AAF69802.1 1e-106 malate dehydrogenase [Vitis vinifera] /REP_ORG=Citrus
	Cit.14457.1.S1_s_at	AFFY CSV: C37_19164 /DEF=Section:2 Forward ESTs:3 BEST NR:BAB10046.1 1e-108 unnamed protein product [Arabidopsis thaliana] /REP_ORG=Citrus
	Cit.24994.1.S1_at	AFFY CSV: C37_23519 /DEF=Section:10 Reversed BEST NR:CAB96681.1 3e-49 non-phototropic hypocotyl 3-like protein [Arabidopsis thaliana] ref|NP_196587.1| phototropic-responsive protein
post-embryonic development	Cit.6804.1.S1_at	AFFY CSV: C37_08968 /DEF=Section:2 Forward ESTs:2 BEST NR:AAB91983.1 6e-81 COP1 regulatory protein [Arabidopsis thaliana] ref|NP_180854.1| COP1 regulatory protein [Arabidopsis thaliana] pir||T01112 photomorphogenesi /REP_ORG=Citrus
	Cit.37332.1.S1_at	AFFY CSV: C37_43218 /DEF=Section:12 Forward BEST NR:NP_192093.1 2e-29 outward rectifying potassium channel
	Cit.21654.1.S1_s_at	AFFY CSV: C37_25265 /DEF=Section:9 Reversed BEST NR:AAC35981.1 5e-27 chitinase CHI1 [Citrus sinensis] /REP_ORG=Citrus
	Cit.13287.1.S1_s_at	AFFY CSV: C37_17605 /DEF=Section:2 Forward ESTs:5 BEST NR:AAC33235.1 1e-115 putative cytochrome P450 [Arabidopsis thaliana] ref|NP_180473.1| cytochrome P450 family protein [Arabidopsis thaliana] pir||T02739 probable /REP_ORG=Citrus
	Cit.31299.1.S1_at	AFFY CSV: C37_21642 /DEF=Section:11 Forward BEST NR:NP_199628.1 2e-37 F-box family protein [Arabidopsis thaliana] dbj|BAA96997.1| unnamed protein product [Arabidopsis thaliana] /REP_ORG=Citrus
	Cit.36604.1.S1_at	AFFY CSV: C37_37345 /DEF=Section:12 Forward BEST NR:T09292 1e-26 embryonic abundant protein D-29 - upland cotton (fragment) gb|AAA33074.1| storage protein /REP_ORG=Citrus
	Cit.6595.1.S1_at	AFFY CSV: C37_08627 /DEF=Section:2 Forward ESTs:3 BEST NR:AAV51939.1 8e-43 SBP transcription factor [Gossypium hirsutum] /REP_ORG=Citrus
	Cit.37192.1.S1_at	AFFY CSV: C37_43060 /DEF=Section:12 Forward BEST NR:NP_192249.1 3e-42 GH3 protein -related [Arabidopsis thaliana] pir||B85043 probable GH3-like protein [imported] - Arabidopsis thaliana /REP_ORG=Citrus
	Cit.27206.1.S1_at	AFFY CSV: C37_35472 /DEF=Section:10 Reversed BEST NR:AAB91983.1 5e-96 COP1 regulatory protein [Arabidopsis thaliana] ref|NP_180854.1| COP1 regulatory protein [Arabidopsis thaliana] pir||T01112 photomorphogenesi /REP_ORG=Citrus
	Cit.33855.1.S1_s_at	AFFY CSV: C37_26270 /DEF=Section:12 Forward BEST NR:AAM91817.1 1e-34 putative phytochrome A supressor spa1 protein [Arabidopsis thaliana] gb|AAK64180.1| putative phytochrome A supressor spa1 protein [Arabidops /REP_ORG=Citrus
	Cit.10912.1.S1_s_at	AFFY CSV: C37_14635 /DEF=Section:2 Forward ESTs:12 BEST NR:AAB71227.1 1e-109 Ca+2-binding EF hand protein [Glycine max] pir||T07092 Ca+2-binding EF hand protein homolog PM13 - soybean /REP_ORG=Citrus
	Cit.33855.1.S1_at	AFFY CSV: C37_26270 /DEF=Section:12 Forward BEST NR:AAM91817.1 1e-34 putative phytochrome A supressor spa1 protein [Arabidopsis thaliana] gb|AAK64180.1| putative phytochrome A supressor spa1 protein [Arabidops /REP_ORG=Citrus
	Cit.28142.1.S1_s_at	AFFY CSV: C37_38117 /DEF=Section:10 Reversed BEST NR:BAB62109.1 3e-85 CYP90D [Arabidopsis thaliana] gb|AAO50626.1| putative cytochrome P450 [Arabidopsis thaliana] gb|AAO42111.1| putative cytochrome P450 [Arabid /REP_ORG=Citrus
response to light stimulus	Cit.6804.1.S1_at	AFFY CSV: C37_08968 /DEF=Section:2 Forward ESTs:2 BEST NR:AAB91983.1 6e-81 COP1 regulatory protein [Arabidopsis thaliana] ref|NP_180854.1| COP1 regulatory protein [Arabidopsis thaliana] pir||T01112 photomorphogenesi /REP_ORG=Citrus
	Cit.13265.1.S1_at	AFFY CSV: C37_17576 /DEF=Section:2 Forward ESTs:8 BEST NR:NP_568246.1 4e-66 bZIP protein HY5 (HY5) [Arabidopsis thaliana] sp|O24646|HY5_ARATH Protein HY5 (AtbZIP56) /REP_ORG=Citrus
	Cit.7266.1.S1_at	AFFY CSV: C37_09807 /DEF=Section:2 Forward ESTs:2 BEST NR:CAB89335.1 1e-34 FtsH-like protein Pftf precursor-like [Arabidopsis thaliana] ref|NP_568311.1| FtsH protease
	Cit.20519.1.S1_at	AFFY CSV: C37_43026 /DEF=Section:8 Forward BEST NR:AAQ10672.1 1e-34 type II CPD photolyase [Stellaria longipes] /REP_ORG=Citrus
	Cit.14457.1.S1_s_at	AFFY CSV: C37_19164 /DEF=Section:2 Forward ESTs:3 BEST NR:BAB10046.1 1e-108 unnamed protein product [Arabidopsis thaliana] /REP_ORG=Citrus
	Cit.13287.1.S1_s_at	AFFY CSV: C37_17605 /DEF=Section:2 Forward ESTs:5 BEST NR:AAC33235.1 1e-115 putative cytochrome P450 [Arabidopsis thaliana] ref|NP_180473.1| cytochrome P450 family protein [Arabidopsis thaliana] pir||T02739 probable /REP_ORG=Citrus
	Cit.374.1.S1_s_at	AFFY CSV: C37_00467 /DEF=Section:2 Forward ESTs:13 BEST NR:AAR09170.1 1e-126 alpha-expansin 3 [Populus tremula x Populus tremuloides] /REP_ORG=Citrus
	Cit.37192.1.S1_at	AFFY CSV: C37_43060 /DEF=Section:12 Forward BEST NR:NP_192249.1 3e-42 GH3 protein -related [Arabidopsis thaliana] pir||B85043 probable GH3-like protein [imported] - Arabidopsis thaliana /REP_ORG=Citrus
	Cit.27206.1.S1_at	AFFY CSV: C37_35472 /DEF=Section:10 Reversed BEST NR:AAB91983.1 5e-96 COP1 regulatory protein [Arabidopsis thaliana] ref|NP_180854.1| COP1 regulatory protein [Arabidopsis thaliana] pir||T01112 photomorphogenesi /REP_ORG=Citrus
	Cit.33855.1.S1_s_at	AFFY CSV: C37_26270 /DEF=Section:12 Forward BEST NR:AAM91817.1 1e-34 putative phytochrome A supressor spa1 protein [Arabidopsis thaliana] gb|AAK64180.1| putative phytochrome A supressor spa1 protein [Arabidops /REP_ORG=Citrus
	Cit.33855.1.S1_at	AFFY CSV: C37_26270 /DEF=Section:12 Forward BEST NR:AAM91817.1 1e-34 putative phytochrome A supressor spa1 protein [Arabidopsis thaliana] gb|AAK64180.1| putative phytochrome A supressor spa1 protein [Arabidops /REP_ORG=Citrus
	Cit.24994.1.S1_at	AFFY CSV: C37_23519 /DEF=Section:10 Reversed BEST NR:CAB96681.1 3e-49 non-phototropic hypocotyl 3-like protein [Arabidopsis thaliana] ref|NP_196587.1| phototropic-responsive protein
	Cit.28142.1.S1_s_at	AFFY CSV: C37_38117 /DEF=Section:10 Reversed BEST NR:BAB62109.1 3e-85 CYP90D [Arabidopsis thaliana] gb|AAO50626.1| putative cytochrome P450 [Arabidopsis thaliana] gb|AAO42111.1| putative cytochrome P450 [Arabid /REP_ORG=Citrus
detection of stimulus	Cit.37192.1.S1_at	AFFY CSV: C37_43060 /DEF=Section:12 Forward BEST NR:NP_192249.1 3e-42 GH3 protein -related [Arabidopsis thaliana] pir||B85043 probable GH3-like protein [imported] - Arabidopsis thaliana /REP_ORG=Citrus
	Cit.6804.1.S1_at	AFFY CSV: C37_08968 /DEF=Section:2 Forward ESTs:2 BEST NR:AAB91983.1 6e-81 COP1 regulatory protein [Arabidopsis thaliana] ref|NP_180854.1| COP1 regulatory protein [Arabidopsis thaliana] pir||T01112 photomorphogenesi /REP_ORG=Citrus
	Cit.33855.1.S1_s_at	AFFY CSV: C37_26270 /DEF=Section:12 Forward BEST NR:AAM91817.1 1e-34 putative phytochrome A supressor spa1 protein [Arabidopsis thaliana] gb|AAK64180.1| putative phytochrome A supressor spa1 protein [Arabidops /REP_ORG=Citrus
	Cit.33855.1.S1_at	AFFY CSV: C37_26270 /DEF=Section:12 Forward BEST NR:AAM91817.1 1e-34 putative phytochrome A supressor spa1 protein [Arabidopsis thaliana] gb|AAK64180.1| putative phytochrome A supressor spa1 protein [Arabidops /REP_ORG=Citrus
	Cit.27206.1.S1_at	AFFY CSV: C37_35472 /DEF=Section:10 Reversed BEST NR:AAB91983.1 5e-96 COP1 regulatory protein [Arabidopsis thaliana] ref|NP_180854.1| COP1 regulatory protein [Arabidopsis thaliana] pir||T01112 photomorphogenesi /REP_ORG=Citrus
photosynthesis	Cit.6829.1.S1_at	AFFY CSV: C37_09006 /DEF=Section:2 Forward ESTs:3 BEST NR:AAQ89660.1 2e-55 At1g70760 [Arabidopsis thaliana] gb|AAG52336.1| unknown protein; 17323-16389 [Arabidopsis thaliana] ref|NP_177233.1| inorganic carbon transp /REP_ORG=Citrus
	Cit.11692.1.S1_s_at	AFFY CSV: C37_15596 /DEF=Section:2 Forward ESTs:4 BEST NR:P27774 1e-110 Phosphoribulokinase
	Cit.7266.1.S1_at	AFFY CSV: C37_09807 /DEF=Section:2 Forward ESTs:2 BEST NR:CAB89335.1 1e-34 FtsH-like protein Pftf precursor-like [Arabidopsis thaliana] ref|NP_568311.1| FtsH protease
	Cit.25007.1.S1_at	AFFY CSV: C37_23900 /DEF=Section:10 Reversed BEST NR:AAQ64538.1 1e-99 NADH dehydrogenase subunit B [Cornus mas] /REP_ORG=Citrus
	Cit.3351.1.S1_s_at	AFFY CSV: C37_04237 /DEF=Section:2 Forward ESTs:6 BEST NR:AAD25541.1 1e-138 fructose-1
	Cit.4410.1.S1_at	AFFY CSV: C37_05595 /DEF=Section:2 Forward ESTs:7 BEST NR:XP_475843.1 1e-132 putative protein kinase [Oryza sativa (japonica cultivar-group)] gb|AAT39246.1| putative protein kinase [Oryza sativa (japonica cultivar-gro /REP_ORG=Citrus
	Cit.28037.1.S1_at	AFFY CSV: C37_37704 /DEF=Section:10 Reversed BEST NR:AAS76683.1 3e-42 At1g60600 [Arabidopsis thaliana] /REP_ORG=Citrus
	Cit.13236.1.S1_s_at	AFFY CSV: C37_17537 /DEF=Section:2 Forward ESTs:2 BEST NR:T10660 7e-52 photosystem II protein W homolog T5F17.110 - Arabidopsis thaliana emb|CAB81454.1| photosystem II protein W-like [Arabidopsis thaliana] /REP_ORG=Citrus
	Cit.37513.1.S1_at	AFFY CSV: C37_43408 /DEF=Section:12 Forward BEST NR:NP_914933.1 6e-67 P0423A12.23 [Oryza sativa (japonica cultivar-group)] dbj|BAB64184.1| P0492G09.4 [Oryza sativa (japonica cultivar-group)] dbj|BAB93252.1| P04 /REP_ORG=Citrus
response to radiation	Cit.6804.1.S1_at	AFFY CSV: C37_08968 /DEF=Section:2 Forward ESTs:2 BEST NR:AAB91983.1 6e-81 COP1 regulatory protein [Arabidopsis thaliana] ref|NP_180854.1| COP1 regulatory protein [Arabidopsis thaliana] pir||T01112 photomorphogenesi /REP_ORG=Citrus
	Cit.13265.1.S1_at	AFFY CSV: C37_17576 /DEF=Section:2 Forward ESTs:8 BEST NR:NP_568246.1 4e-66 bZIP protein HY5 (HY5) [Arabidopsis thaliana] sp|O24646|HY5_ARATH Protein HY5 (AtbZIP56) /REP_ORG=Citrus
	Cit.7266.1.S1_at	AFFY CSV: C37_09807 /DEF=Section:2 Forward ESTs:2 BEST NR:CAB89335.1 1e-34 FtsH-like protein Pftf precursor-like [Arabidopsis thaliana] ref|NP_568311.1| FtsH protease
	Cit.20519.1.S1_at	AFFY CSV: C37_43026 /DEF=Section:8 Forward BEST NR:AAQ10672.1 1e-34 type II CPD photolyase [Stellaria longipes] /REP_ORG=Citrus
	Cit.14457.1.S1_s_at	AFFY CSV: C37_19164 /DEF=Section:2 Forward ESTs:3 BEST NR:BAB10046.1 1e-108 unnamed protein product [Arabidopsis thaliana] /REP_ORG=Citrus
	Cit.13287.1.S1_s_at	AFFY CSV: C37_17605 /DEF=Section:2 Forward ESTs:5 BEST NR:AAC33235.1 1e-115 putative cytochrome P450 [Arabidopsis thaliana] ref|NP_180473.1| cytochrome P450 family protein [Arabidopsis thaliana] pir||T02739 probable /REP_ORG=Citrus
	Cit.374.1.S1_s_at	AFFY CSV: C37_00467 /DEF=Section:2 Forward ESTs:13 BEST NR:AAR09170.1 1e-126 alpha-expansin 3 [Populus tremula x Populus tremuloides] /REP_ORG=Citrus
	Cit.37192.1.S1_at	AFFY CSV: C37_43060 /DEF=Section:12 Forward BEST NR:NP_192249.1 3e-42 GH3 protein -related [Arabidopsis thaliana] pir||B85043 probable GH3-like protein [imported] - Arabidopsis thaliana /REP_ORG=Citrus
	Cit.27206.1.S1_at	AFFY CSV: C37_35472 /DEF=Section:10 Reversed BEST NR:AAB91983.1 5e-96 COP1 regulatory protein [Arabidopsis thaliana] ref|NP_180854.1| COP1 regulatory protein [Arabidopsis thaliana] pir||T01112 photomorphogenesi /REP_ORG=Citrus
	Cit.33855.1.S1_s_at	AFFY CSV: C37_26270 /DEF=Section:12 Forward BEST NR:AAM91817.1 1e-34 putative phytochrome A supressor spa1 protein [Arabidopsis thaliana] gb|AAK64180.1| putative phytochrome A supressor spa1 protein [Arabidops /REP_ORG=Citrus
	Cit.33855.1.S1_at	AFFY CSV: C37_26270 /DEF=Section:12 Forward BEST NR:AAM91817.1 1e-34 putative phytochrome A supressor spa1 protein [Arabidopsis thaliana] gb|AAK64180.1| putative phytochrome A supressor spa1 protein [Arabidops /REP_ORG=Citrus
	Cit.24994.1.S1_at	AFFY CSV: C37_23519 /DEF=Section:10 Reversed BEST NR:CAB96681.1 3e-49 non-phototropic hypocotyl 3-like protein [Arabidopsis thaliana] ref|NP_196587.1| phototropic-responsive protein
	Cit.28142.1.S1_s_at	AFFY CSV: C37_38117 /DEF=Section:10 Reversed BEST NR:BAB62109.1 3e-85 CYP90D [Arabidopsis thaliana] gb|AAO50626.1| putative cytochrome P450 [Arabidopsis thaliana] gb|AAO42111.1| putative cytochrome P450 [Arabid /REP_ORG=Citrus
coumarin biosynthetic process	Cit.28372.1.S1_at	AFFY CSV: C37_39039 /DEF=Section:10 Reversed BEST NR:AAP04064.1 1e-07 putative cinnamoyl-CoA reductase [Arabidopsis thaliana] gb|AAO64184.1| putative cinnamoyl-CoA reductase [Arabidopsis thaliana] gb|AAC78522.1 /REP_ORG=Citrus
	Cit.30567.1.S1_at	AFFY CSV: C37_13939 /DEF=Section:11 Forward BEST NR:O48922 2e-71 Cytochrome P450 98A2 gb|AAB94587.1| CYP98A2p [Glycine max] pir||T05937 cytochrome P450 monooxygenase 98A2p - soybean /REP_ORG=Citrus
	Cit.10353.1.S1_at	AFFY CSV: C37_13940 /DEF=Section:2 Forward ESTs:31 BEST NR:O48922 1e-121 Cytochrome P450 98A2 gb|AAB94587.1| CYP98A2p [Glycine max] pir||T05937 cytochrome P450 monooxygenase 98A2p - soybean /REP_ORG=Citrus
	Cit.6322.1.S1_at	AFFY CSV: C37_08197 /DEF=Section:2 Forward ESTs:2 BEST NR:CAA54612.1 3e-73 UTP-glucose glucosyltransferase [Manihot esculenta] sp|Q40287|UFO5_MANES Flavonol 3-O-glucosyltransferase 5 (UDP-glucose flavonoid 3-O-gluco /REP_ORG=Citrus
	Cit.11987.1.S1_s_at	AFFY CSV: C37_15975 /DEF=Section:2 Forward ESTs:8 BEST NR:AAC24504.1 1e-121 4-coumarate:CoA ligase [Populus tremuloides] pir||T08075 4-coumarate-CoA ligase (EC 6.2.1.12) (clone 4CL2) [validated] - quaking aspen /REP_ORG=Citrus
coumarin metabolic process	Cit.28372.1.S1_at	AFFY CSV: C37_39039 /DEF=Section:10 Reversed BEST NR:AAP04064.1 1e-07 putative cinnamoyl-CoA reductase [Arabidopsis thaliana] gb|AAO64184.1| putative cinnamoyl-CoA reductase [Arabidopsis thaliana] gb|AAC78522.1 /REP_ORG=Citrus
	Cit.30567.1.S1_at	AFFY CSV: C37_13939 /DEF=Section:11 Forward BEST NR:O48922 2e-71 Cytochrome P450 98A2 gb|AAB94587.1| CYP98A2p [Glycine max] pir||T05937 cytochrome P450 monooxygenase 98A2p - soybean /REP_ORG=Citrus
	Cit.10353.1.S1_at	AFFY CSV: C37_13940 /DEF=Section:2 Forward ESTs:31 BEST NR:O48922 1e-121 Cytochrome P450 98A2 gb|AAB94587.1| CYP98A2p [Glycine max] pir||T05937 cytochrome P450 monooxygenase 98A2p - soybean /REP_ORG=Citrus
	Cit.6322.1.S1_at	AFFY CSV: C37_08197 /DEF=Section:2 Forward ESTs:2 BEST NR:CAA54612.1 3e-73 UTP-glucose glucosyltransferase [Manihot esculenta] sp|Q40287|UFO5_MANES Flavonol 3-O-glucosyltransferase 5 (UDP-glucose flavonoid 3-O-gluco /REP_ORG=Citrus
	Cit.11987.1.S1_s_at	AFFY CSV: C37_15975 /DEF=Section:2 Forward ESTs:8 BEST NR:AAC24504.1 1e-121 4-coumarate:CoA ligase [Populus tremuloides] pir||T08075 4-coumarate-CoA ligase (EC 6.2.1.12) (clone 4CL2) [validated] - quaking aspen /REP_ORG=Citrus
