# Supplementary material for: Alternate Bearing in Citrus: Changes in the Expression of Flowering Control Genes and in Global Gene Expression in ON- versus OFF-Crop Trees
Source: PLoS One. 2012 Oct 11;7(10):e46930. doi: 10.1371/journal.pone.0046930 (PMC3469648; doi:10.1371/journal.pone.0046930)
Supplement: Table S5 — Probe list of Fig. 5 . (XLSX) [file pone.0046930.s011.xlsx]

## Sheet: fig. 5 probes
BinCode	BinName	Probe ID	Description	May Bud On Off FC
10.5.1	cell wall.cell wall proteins.AGPs	cit.10692.1.s1_at;	moderately similar to ( 259)AT2G04780| Symbols: FLA7 | FLA7 | chr2:1677485-1678249 FORWARD affx|C37_14365;	1.53278
10.5.1	cell wall.cell wall proteins.AGPs	cit.10690.1.s1_s_at;	moderately similar to ( 266)AT2G04780| Symbols: FLA7 | FLA7 | chr2:1677485-1678249 FORWARD affx|C37_14363;	1.60847
10.5.1	cell wall.cell wall proteins.AGPs	cit.10691.1.s1_s_at;	weakly similar to ( 113)AT2G04780| Symbols: FLA7 | FLA7 | chr2:1677485-1678249 FORWARD affx|C37_14364;	1.72577
10.5.1	cell wall.cell wall proteins.AGPs	cit.30882.1.s1_at;	weakly similar to ( 173)AT5G60490| Symbols: FLA12 | FLA12 (fasciclin-like arabinogalactan-protein 12) | chr5:24343142-24343891 REVERSE affx|C37_18814;	4.96493
10.5.5	cell wall.cell wall proteins.RGP	cit.25647.1.s1_at;	weakly similar to ( 177)AT5G16510| Symbols: | reversibly glycosylated polypeptide, putative | chr5:5393299-5394345 FORWARDweakly similar to ( 130)UPTG2_SOLTU affx|C37_31176;	1.40695
10.5.5	cell wall.cell wall proteins.RGP	cit.14059.1.s1_s_at;	weakly similar to ( 178)AT5G16510| Symbols: | reversibly glycosylated polypeptide, putative | chr5:5393299-5394345 FORWARDweakly similar to ( 129)UPTG1_SOLTU affx|C37_18613;	1.19708
3.1.2.2	minor CHO metabolism.raffinose family.raffinose synthases.putative	cit.10279.1.s1_at;	highly similar to ( 842)AT3G57520| Symbols: ATSIP2 | ATSIP2 (ARABIDOPSIS THALIANA SEED IMBIBITION 2); hydrolase, hydrolyzing O-glycosyl compounds | chr3:21300276-21303671 REVERSEmoderately similar to ( 306)STSYN_PEA affx|C37_13847;	-1.36339
3.2.2	minor CHO metabolism.trehalose.TPP	cit.14906.1.s1_at;	moderately similar to ( 481)AT5G65140| Symbols: | trehalose-6-phosphate phosphatase, putative | chr5:26037637-26039303 REVERSE affx|C37_19780;	2.15116
3.2.2	minor CHO metabolism.trehalose.TPP	cit.24193.1.s1_at;	moderately similar to ( 223)AT5G51460| Symbols: ATTPPA | ATTPPA (Arabidopsis thaliana trehalose-6-phosphate phosphatase); trehalose-phosphatase | chr5:20919492-20921518 FORWARD affx|C37_40799;	2.01854
3.2.2	minor CHO metabolism.trehalose.TPP	cit.20852.1.s1_s_at;	very weakly similar to (95.5)AT4G39770| Symbols: | trehalose-6-phosphate phosphatase, putative | chr4:18449132-18451212 REVERSE affx|C37_45410;	2.05891
3.2.2	minor CHO metabolism.trehalose.TPP	cit.14905.1.s1_s_at;	weakly similar to ( 186)AT5G65140| Symbols: | trehalose-6-phosphate phosphatase, putative | chr5:26037637-26039303 REVERSE affx|C37_19779;	2.10812
3.2.3	minor CHO metabolism.trehalose.potential TPS/TPP	cit.31285.1.s1_at;	weakly similar to ( 112)AT2G18700| Symbols: TPS11, ATTPSB, ATTPS11 | ATTPS11 (Arabidopsis thaliana trehalose phosphatase/synthase 11); transferase, transferring glycosyl groups | chr2:8116125-8118881 FORWARD affx|C37_21589;	1.9291
3.2.3	minor CHO metabolism.trehalose.potential TPS/TPP	cit.11405.1.s1_s_at;	nearly identical (1307)AT4G17770| Symbols: TPS5, ATTPS5 | ATTPS5 (Arabidopsis thaliana trehalose phosphatase/synthase 5); transferase, transferring glycosyl groups / trehalose-phosphatase | chr4:9877068-9880097 FORWARD affx|C37_15251;	-1.30157
3.2.3	minor CHO metabolism.trehalose.potential TPS/TPP	cit.34457.1.s1_at;	moderately similar to ( 219)AT1G70290| Symbols: TPS8, ATTPSC, ATTPS8 | ATTPS8 (Arabidopsis thaliana trehalose phosphatase/synthase 8); transferase, transferring glycosyl groups | chr1:26474949-26477741 REVERSE affx|C37_27226;	1.43455
3.2.3	minor CHO metabolism.trehalose.potential TPS/TPP	cit.30185.1.s1_at;	weakly similar to ( 199)AT1G60140| Symbols: TPS10, ATTPS10 | ATTPS10 (TREHALOSE PHOSPHATE SYNTHASE); transferase, transferring glycosyl groups / trehalose-phosphatase | chr1:22180911-22183738 REVERSE affx|C37_09750;	2.27624
3.3	minor CHO metabolism.sugar alcohols	cit.28061.1.s1_at;	moderately similar to ( 211)AT5G51970| Symbols: | sorbitol dehydrogenase, putative / L-iditol 2-dehydrogenase, putative | chr5:21129046-21130510 FORWARD affx|C37_37787;	-1.81001
3.3	minor CHO metabolism.sugar alcohols	cit.14061.1.s1_at;	moderately similar to ( 325)AT4G30310| Symbols: | ribitol kinase, putative | chr4:14831919-14835098 FORWARD affx|C37_18616;	-1.30411
3.4.3	minor CHO metabolism.myo-inositol.InsP Synthases	cit.8558.1.s1_s_at;	highly similar to ( 951)AT2G22240| Symbols: | inositol-3-phosphate synthase isozyme 2 / myo-inositol-1-phosphate synthase 2 / MI-1-P synthase 2 / IPS 2 | chr2:9458981-9460455 REVERSEhighly similar to ( 975)INO1_TOBAC affx|C37_11721;	-1.8826
3.4.3	minor CHO metabolism.myo-inositol.InsP Synthases	cit.30453.1.s1_at;	moderately similar to ( 317)AT2G22240| Symbols: | inositol-3-phosphate synthase isozyme 2 / myo-inositol-1-phosphate synthase 2 / MI-1-P synthase 2 / IPS 2 | chr2:9458981-9460455 REVERSEmoderately similar to ( 323)INO1_TOBAC affx|C37_11726;	-4.09862
3.4.4	minor CHO metabolism.myo-inositol.myo inositol oxygenases	cit.25121.1.s1_at;	moderately similar to ( 311)AT1G14520| Symbols: MIOX1 | MIOX1 (MYO-INISITOL OXYGENASE); oxidoreductase | chr1:4968371-4969949 REVERSEmoderately similar to ( 293)MIOX_ORYSA affx|C37_27243;	1.60292
3.5	minor CHO metabolism.others	cit.30652.1.s1_s_at;	weakly similar to ( 174)AT2G37770| Symbols: | aldo/keto reductase family protein | chr2:15841966-15843737 FORWARDweakly similar to ( 143)ALDR_HORVU affx|C37_15769;	1.47882
3.5	minor CHO metabolism.others	cit.17231.1.s1_at;	moderately similar to ( 276)AT1G06690| Symbols: | aldo/keto reductase family protein | chr1:2049741-2052038 REVERSE affx|C37_05767;	-2.78685
3.5	minor CHO metabolism.others	cit.13271.1.s1_s_at;	moderately similar to ( 349)AT1G59950| Symbols: | aldo/keto reductase, putative | chr1:22071698-22074253 REVERSEmoderately similar to ( 338)6DCS_SOYBN affx|C37_17583;	-1.38645
3.5	minor CHO metabolism.others	cit.29391.1.s1_s_at;	moderately similar to ( 265)AT1G59950| Symbols: | aldo/keto reductase, putative | chr1:22071698-22074253 REVERSEmoderately similar to ( 273)6DCS_SOYBN affx|C37_01412;	1.36484
3.5	minor CHO metabolism.others	cit.31129.1.s1_at;	moderately similar to ( 210)AT1G59950| Symbols: | aldo/keto reductase, putative | chr1:22071698-22074253 REVERSEmoderately similar to ( 202)NADO1_ORYSA affx|C37_20911;	-2.27944
3.5	minor CHO metabolism.others	cit.11834.1.s1_at;	moderately similar to ( 243)AT2G37790| Symbols: | aldo/keto reductase family protein | chr2:15845916-15847830 FORWARDmoderately similar to ( 208)ALDR_HORVU affx|C37_15768;	1.30254
3.5	minor CHO metabolism.others	cit.3651.1.s1_s_at;	moderately similar to ( 278)AT3G01590| Symbols: | aldose 1-epimerase family protein | chr3:226654-228353 FORWARD affx|C37_04606;	1.77291
3.5	minor CHO metabolism.others	cit.14183.1.s1_at;	highly similar to ( 590)AT1G04420| Symbols: | aldo/keto reductase family protein | chr1:1191633-1193698 FORWARDweakly similar to ( 105)A115_TOBAC affx|C37_18781;	-1.36891
3.5	minor CHO metabolism.others	cit.4069.1.s1_x_at;	moderately similar to ( 354)AT1G59950| Symbols: | aldo/keto reductase, putative | chr1:22071698-22074253 REVERSEmoderately similar to ( 322)NADO1_ORYSA affx|C37_05155;	18.107
3.5	minor CHO metabolism.others	cit.2085.1.s1_at;	moderately similar to ( 448)AT2G27680| Symbols: | aldo/keto reductase family protein | chr2:11811058-11813042 REVERSE affx|C37_02631;	-1.37101
3.5	minor CHO metabolism.others	cit.1115.1.s1_s_at;	moderately similar to ( 363)AT1G59960| Symbols: | aldo/keto reductase, putative | chr1:22075075-22076732 REVERSEmoderately similar to ( 363)6DCS_SOYBN affx|C37_01415;	-1.7908
3.5	minor CHO metabolism.others	cit.16453.1.s1_at;	very weakly similar to (96.7)AT5G53850| Symbols: | haloacid dehalogenase-like hydrolase family protein | chr5:21878843-21882043 REVERSE affx|C37_22338;	-1.84282
3.5	minor CHO metabolism.others	cit.21995.1.s1_s_at;	moderately similar to ( 211)AT5G53850| Symbols: | haloacid dehalogenase-like hydrolase family protein | chr5:21878843-21882043 REVERSE affx|C37_29733;	1.45848
3.5	minor CHO metabolism.others	cit.2084.1.s1_s_at;	highly similar to ( 616)AT2G27680| Symbols: | aldo/keto reductase family protein | chr2:11811058-11813042 REVERSE affx|C37_02630;	-1.74633
3.5	minor CHO metabolism.others	cit.37237.1.s1_at;	weakly similar to ( 181)AT3G61610| Symbols: | aldose 1-epimerase family protein | chr3:22810455-22812004 FORWARD affx|C37_43111;	-2.042
3.5	minor CHO metabolism.others	cit.26762.1.s1_at;	weakly similar to ( 139)AT3G17770| Symbols: | dihydroxyacetone kinase family protein | chr3:6081979-6085963 REVERSE affx|C37_34417;	-1.49126
3.5	minor CHO metabolism.others	cit.14658.1.s1_at;	moderately similar to ( 293)AT2G37770| Symbols: | aldo/keto reductase family protein | chr2:15841966-15843737 FORWARDweakly similar to ( 173)ALDR_HORVU affx|C37_19430;	-1.40363
3.5	minor CHO metabolism.others	cit.24373.1.s1_s_at;	weakly similar to ( 165)AT2G27680| Symbols: | aldo/keto reductase family protein | chr2:11811058-11813042 REVERSE affx|C37_41328;	-1.93606
3.5	minor CHO metabolism.others	cit.38737.1.s1_at;	moderately similar to ( 280)AT5G53580| Symbols: | aldo/keto reductase family protein | chr5:21782441-21784145 REVERSE affx|C37_44695;	-1.65614
3.5	minor CHO metabolism.others	cit.9347.1.s1_at;	highly similar to ( 549)AT5G53850| Symbols: | haloacid dehalogenase-like hydrolase family protein | chr5:21878843-21882043 REVERSE affx|C37_12704;	1.44725
3.5	minor CHO metabolism.others	cit.4068.1.s1_s_at;	weakly similar to ( 102)AT1G59950| Symbols: | aldo/keto reductase, putative | chr1:22071698-22074253 REVERSEvery weakly similar to (93.6)6DCS_SOYBN affx|C37_05154;	20.6639
3.6	minor CHO metabolism.callose	cit.2959.1.s1_at;	highly similar to ( 615)AT1G05570| Symbols: GSL06, ATGSL6, ATGSL06, GSL6, CALS1 | CALS1 (CALLOSE SYNTHASE 1); transferase, transferring glycosyl groups | chr1:1647879-1658676 REVERSE affx|C37_03739;	-1.46362
3.6	minor CHO metabolism.callose	cit.32240.1.s1_at;	weakly similar to ( 181)AT4G04970| Symbols: ATGSL01, GSL01, ATGSL1 | ATGSL1 (GLUCAN SYNTHASE LIKE-1); 1,3-beta-glucan synthase/ transferase, transferring glycosyl groups | chr4:2537037-2542432 FORWARD affx|C37_23850;	-1.47517
3.6	minor CHO metabolism.callose	cit.2960.1.s1_s_at;	highly similar to ( 959)AT1G05570| Symbols: GSL06, ATGSL6, ATGSL06, GSL6, CALS1 | CALS1 (CALLOSE SYNTHASE 1); transferase, transferring glycosyl groups | chr1:1647879-1658676 REVERSE affx|C37_03740;	-1.38077
10.8.1	cell wall.pectin*esterases.PME	cit.5248.1.s1_at;	highly similar to ( 668)AT2G26440| Symbols: | pectinesterase family protein | chr2:11254485-11256485 FORWARDmoderately similar to ( 397)PME2_CITSI affx|C37_06647;	2.18163
10.8.1	cell wall.pectin*esterases.PME	cit.1645.1.s1_s_at;	highly similar to ( 614)AT1G53840| Symbols: ATPME1 | ATPME1 (Arabidopsis thaliana pectin methylesterase 1); pectinesterase | chr1:20105201-20107126 FORWARDhighly similar to ( 631)PME3_PHAVU affx|C37_02079;	1.67345
10.8.2	cell wall.pectin*esterases.acetyl esterase	cit.26363.1.s1_at;	moderately similar to ( 229)AT5G23870| Symbols: | pectinacetylesterase family protein | chr5:8046312-8050002 REVERSE affx|C37_33214;	1.59398
10.8.2	cell wall.pectin*esterases.acetyl esterase	cit.9134.1.s1_s_at;	highly similar to ( 606)AT4G19420| Symbols: | pectinacetylesterase family protein | chr4:10587515-10589818 REVERSE affx|C37_12445;	1.64283
10.7	cell wall.modification	cit.30513.1.s1_x_at;	moderately similar to ( 379)AT4G25810| Symbols: XTH23, XTR6 | XTR6 (XYLOGLUCAN ENDOTRANSGLYCOSYLASE 6); hydrolase, acting on glycosyl bonds | chr4:13128703-13129724 FORWARDmoderately similar to ( 340)BRU1_SOYBN affx|C37_12795;	6.64681
10.7	cell wall.modification	cit.5956.1.s1_s_at;	weakly similar to ( 137)AT2G18660| Symbols: EXLB3 | EXLB3 (EXPANSIN-LIKE B3 PRECURSOR) | chr2:8098114-8098726 REVERSE affx|C37_07636;	1.84291
10.7	cell wall.modification	cit.13059.1.s1_s_at;	highly similar to ( 522)AT1G11545| Symbols: | xyloglucan:xyloglucosyl transferase, putative / xyloglucan endotransglycosylase, putative / endo-xyloglucan transferase, putative | chr1:3878689-3880286 REVERSEmoderately similar to ( 290)XTH_WHEAT affx|C37_17304;	1.72086
10.7	cell wall.modification	cit.13455.1.s1_s_at;	highly similar to ( 528)AT5G13870| Symbols: EXGT-A4 | EXGT-A4 (ENDOXYLOGLUCAN TRANSFERASE A4); hydrolase, acting on glycosyl bonds | chr5:4475091-4476219 REVERSEhighly similar to ( 541)XTHB_PHAAN affx|C37_17819;	2.2946
10.7	cell wall.modification	cit.10687.1.s1_s_at;	moderately similar to ( 463)AT2G39700| Symbols: ATEXP4, ATHEXP ALPHA 1.6, ATEXPA4 | ATEXPA4 (ARABIDOPSIS THALIANA EXPANSIN A4) | chr2:16551324-16552512 REVERSEmoderately similar to ( 446)EXPA7_ORYSA affx|C37_14360;	1.82361
10.7	cell wall.modification	cit.374.1.s1_s_at;	moderately similar to ( 372)AT1G69530| Symbols: EXP1, AT-EXP1, ATEXP1, ATHEXP ALPHA 1.2, ATEXPA1 | ATEXPA1 (ARABIDOPSIS THALIANA EXPANSIN A1) | chr1:26145697-26146863 FORWARDmoderately similar to ( 332)EXPA2_ORYSA affx|C37_00467;	-2.11092
10.7	cell wall.modification	cit.28626.1.s1_s_at;	weakly similar to ( 169)AT1G65681| Symbols: | similar to ATEXPB4 (ARABIDOPSIS THALIANA EXPANSIN B4) [Arabidopsis thaliana] (TAIR:AT2G45110.1); similar to unnamed protein product [Vitis vinifera] (GB:CAO70608.1); contains InterPro domain Expansin 45, endoglucanase-like (InterPro:IPR007112); contains InterPro domain Rare lipoprotein A (InterPro:IPR005132); contains InterPro domain Major pollen alle…	3.29572
10.7	cell wall.modification	cit.24646.1.s1_s_at;	weakly similar to ( 163)AT1G11545| Symbols: | xyloglucan:xyloglucosyl transferase, putative / xyloglucan endotransglycosylase, putative / endo-xyloglucan transferase, putative | chr1:3878689-3880286 REVERSEvery weakly similar to (84.0)XTHB_PHAAN affx|C37_42080;	2.47855
10.7	cell wall.modification	cit.25027.1.s1_at;	weakly similar to ( 198)AT5G57560| Symbols: XTH22, TCH4 | TCH4 (TOUCH 4); hydrolase, acting on glycosyl bonds / xyloglucan:xyloglucosyl transferase | chr5:23324522-23325461 REVERSEweakly similar to ( 176)BRU1_SOYBN affx|C37_24776;	4.3945
10.7	cell wall.modification	cit.9528.1.s1_x_at;	moderately similar to ( 211)AT1G65680| Symbols: EXPB2, ATHEXP BETA 1.4, ATEXPB2 | ATEXPB2 (ARABIDOPSIS THALIANA EXPANSIN B2) | chr1:24430929-24432062 FORWARDmoderately similar to ( 214)EXB11_ORYSA affx|C37_12924;	3.49048
10.7	cell wall.modification	cit.26184.1.s1_at;	moderately similar to ( 394)AT1G11545| Symbols: | xyloglucan:xyloglucosyl transferase, putative / xyloglucan endotransglycosylase, putative / endo-xyloglucan transferase, putative | chr1:3878689-3880286 REVERSEmoderately similar to ( 230)XTH_SOYBN affx|C37_32746;	3.08477
10.7	cell wall.modification	cit.30516.1.s1_at;	weakly similar to ( 186)AT2G40610| Symbols: EXP8, ATEXP8, ATHEXP ALPHA 1.11, ATEXPA8 | ATEXPA8 (ARABIDOPSIS THALIANA EXPANSIN A8) | chr2:16956199-16957550 REVERSEweakly similar to ( 180)EXPA4_ORYSA affx|C37_12814;	1.39782
10.7	cell wall.modification	cit.9441.1.s1_at;	weakly similar to ( 166)AT2G40610| Symbols: EXP8, ATEXP8, ATHEXP ALPHA 1.11, ATEXPA8 | ATEXPA8 (ARABIDOPSIS THALIANA EXPANSIN A8) | chr2:16956199-16957550 REVERSEweakly similar to ( 168)EXPA2_ORYSA affx|C37_12817;	1.95936
10.7	cell wall.modification	cit.9421.1.s1_s_at;	weakly similar to ( 188)AT4G25810| Symbols: XTH23, XTR6 | XTR6 (XYLOGLUCAN ENDOTRANSGLYCOSYLASE 6); hydrolase, acting on glycosyl bonds | chr4:13128703-13129724 FORWARDweakly similar to ( 168)BRU1_SOYBN affx|C37_12792;	4.33024
10.3	cell wall.hemicellulose synthesis	cit.24103.1.s1_at;	weakly similar to ( 129)AT2G20370| Symbols: KAM1, MUR3 | KAM1/MUR3 (MURUS 3); catalytic/ transferase, transferring glycosyl groups | chr2:8799436-8801295 FORWARDweakly similar to ( 119)KATAM_ORYSA affx|C37_40567;	1.28804
10.2.1	cell wall.cellulose synthesis.cellulose synthase	cit.31030.1.s1_at;	weakly similar to ( 126)AT4G23990| Symbols: CSLG3, ATCSLG3 | ATCSLG3 (Cellulose synthase-like G3); transferase/ transferase, transferring glycosyl groups | chr4:12456501-12460508 FORWARD affx|C37_20218;	1.22889
10.2.1	cell wall.cellulose synthesis.cellulose synthase	cit.22319.1.s1_s_at;	weakly similar to ( 160)AT1G55850| Symbols: CSLE1, ATCSLE1 | ATCSLE1 (Cellulose synthase-like E1); cellulose synthase/ transferase, transferring glycosyl groups | chr1:20880418-20883080 FORWARD affx|C37_31137;	-1.6167
10.2.1	cell wall.cellulose synthesis.cellulose synthase	cit.13732.1.s1_at;	weakly similar to ( 185)AT4G23990| Symbols: CSLG3, ATCSLG3 | ATCSLG3 (Cellulose synthase-like G3); transferase/ transferase, transferring glycosyl groups | chr4:12456501-12460508 FORWARD affx|C37_18175;	1.981
10.2.1	cell wall.cellulose synthesis.cellulose synthase	cit.16559.1.s1_at;	weakly similar to ( 129)AT2G32540| Symbols: CSLB04, ATCSLB4, ATCSLB04 | ATCSLB04 (Cellulose synthase-like B4); transferase/ transferase, transferring glycosyl groups | chr2:13821763-13825366 FORWARD affx|C37_22507;	-1.80831
10.2.1	cell wall.cellulose synthesis.cellulose synthase	cit.4946.1.s1_s_at;	moderately similar to ( 201)AT4G24000| Symbols: CSLG2, ATCSLG2 | ATCSLG2 (Cellulose synthase-like G2); transferase/ transferase, transferring glycosyl groups | chr4:12462152-12465481 FORWARD affx|C37_06272;	1.51256
10.2.1	cell wall.cellulose synthesis.cellulose synthase	cit.37298.1.s1_at;	moderately similar to ( 288)AT1G02730| Symbols: CSLD5, ATCSLD5 | ATCSLD5 (CELLULOSE SYNTHASE-LIKE D5); 1,4-beta-D-xylan synthase/ cellulose synthase | chr1:594697-598473 REVERSE affx|C37_43179;	1.77013
10.2.1	cell wall.cellulose synthesis.cellulose synthase	cit.13744.1.s1_s_at;	weakly similar to ( 136)AT4G24000| Symbols: CSLG2, ATCSLG2 | ATCSLG2 (Cellulose synthase-like G2); transferase/ transferase, transferring glycosyl groups | chr4:12462152-12465481 FORWARD affx|C37_18190;	1.50194
10.2.1	cell wall.cellulose synthesis.cellulose synthase	cit.15437.1.s1_at;	weakly similar to ( 197)AT2G32530| Symbols: CSLB03, ATCSLB3, ATCSLB03 | ATCSLB03 (Cellulose synthase-like B3); transferase/ transferase, transferring glycosyl groups | chr2:13816360-13820564 FORWARD affx|C37_20618;	-1.64679
10.2.1	cell wall.cellulose synthesis.cellulose synthase	cit.13732.1.s1_s_at;	weakly similar to ( 185)AT4G23990| Symbols: CSLG3, ATCSLG3 | ATCSLG3 (Cellulose synthase-like G3); transferase/ transferase, transferring glycosyl groups | chr4:12456501-12460508 FORWARD affx|C37_18175;	1.83336
10.2.1	cell wall.cellulose synthesis.cellulose synthase	cit.13733.1.s1_at;	highly similar to ( 550)AT4G23990| Symbols: CSLG3, ATCSLG3 | ATCSLG3 (Cellulose synthase-like G3); transferase/ transferase, transferring glycosyl groups | chr4:12456501-12460508 FORWARD affx|C37_18176;	1.62531
10.2.1	cell wall.cellulose synthesis.cellulose synthase	cit.3503.1.s1_s_at;	moderately similar to ( 298)AT5G64740| Symbols: CESA6, IXR2, E112, PRC1 | CESA6 (CELLULOSE SYNTHASE 6); transferase, transferring glycosyl groups | chr5:25898781-25903559 FORWARD affx|C37_04429;	-1.45084
10.2.1	cell wall.cellulose synthesis.cellulose synthase	cit.12234.1.s1_at;	moderately similar to ( 349)AT2G32540| Symbols: CSLB04, ATCSLB4, ATCSLB04 | ATCSLB04 (Cellulose synthase-like B4); transferase/ transferase, transferring glycosyl groups | chr2:13821763-13825366 FORWARD affx|C37_16292;	-2.31671
10.2.1	cell wall.cellulose synthesis.cellulose synthase	cit.38806.1.s1_at;	moderately similar to ( 233)AT1G02730| Symbols: CSLD5, ATCSLD5 | ATCSLD5 (CELLULOSE SYNTHASE-LIKE D5); 1,4-beta-D-xylan synthase/ cellulose synthase | chr1:594697-598473 REVERSE affx|C37_44777;	2.43577
10.1	cell wall.precursor synthesis	cit.39528.1.s1_at;	moderately similar to ( 243)AT2G35020| Symbols: | UTP--glucose-1-phosphate uridylyltransferase family protein | chr2:14763882-14767556 FORWARD affx|C37_45919;	1.23965
10.1.1.20	cell wall.precursor synthesis.NDP sugar pyrophosphorylase.multiple NDP-Sugars	cit.28230.1.s1_at;	weakly similar to ( 198)AT5G52560| Symbols: ATUSP | ATUSP (ARABIDOPSIS THALIANA UDP-SUGAR PYROPHOSPHORYLASE); UTP-monosaccharide-1-phosphate uridylyltransferase/ UTP:arabinose-1-phosphate uridylyltransferase/ UTP:galactose-1-phosphate uridylyltransferase/ UTP:glucose-1-phosphate uridylyltransferase/ UTP:xy | chr5:21348456-21351799 FORWARD affx|C37_38354;	-1.21518
10.1.2	cell wall.precursor synthesis.UGE	cit.30402.1.s1_at;	moderately similar to ( 382)AT1G12780| Symbols: UGE1 | UGE1 (UDP-D-GLUCOSE/UDP-D-GALACTOSE 4-EPIMERASE 1); UDP-glucose 4-epimerase/ protein dimerization | chr1:4356122-4358118 REVERSEmoderately similar to ( 374)GALE1_PEA affx|C37_10887;	1.72096
10.1.2	cell wall.precursor synthesis.UGE	cit.24969.1.s1_at;	very weakly similar to (99.4)AT4G10960| Symbols: UGE5 | UGE5 (UDP-D-GLUCOSE/UDP-D-GALACTOSE 4-EPIMERASE 5); UDP-glucose 4-epimerase/ protein dimerization | chr4:6716079-6718468 REVERSEvery weakly similar to (88.6)GALE1_PEA affx|C37_45462;	1.58783
10.1.4	cell wall.precursor synthesis.UGD	cit.851.1.s1_s_at;	highly similar to ( 907)AT5G15490| Symbols: | UDP-glucose 6-dehydrogenase, putative | chr5:5027875-5029317 REVERSEhighly similar to ( 926)UGDH_SOYBN affx|C37_01079;	1.65509
10.1.5	cell wall.precursor synthesis.UXS	cit.12466.1.s1_s_at;	highly similar to ( 637)AT2G28760| Symbols: UXS6 | UXS6 | chr2:12343546-12345719 REVERSEweakly similar to ( 106)GME2_ORYSA affx|C37_16574;	1.80226
10.1.5	cell wall.precursor synthesis.UXS	cit.10994.1.s1_at;	moderately similar to ( 367)AT3G62830| Symbols: AUD1, ATUXS2, UXS2 | UXS2 (UDP-GLUCURONIC ACID DECARBOXYLASE 2) | chr3:23243514-23246328 FORWARDvery weakly similar to (88.6)GME1_ORYSA affx|C37_14735;	1.51696
10.1.5	cell wall.precursor synthesis.UXS	cit.5287.1.s1_at;	highly similar to ( 618)AT3G46440| Symbols: UXS5 | UXS5 (UDP-Xyl synthase 5); catalytic | chr3:17100253-17102596 REVERSEweakly similar to ( 103)GME2_ORYSA affx|C37_06695;	1.48946
10.1.10	cell wall.precursor synthesis.RHM	cit.10563.1.s1_at;	highly similar to ( 536)AT1G63000| Symbols: UER1, NRS/ER | NRS/ER (NUCLEOTIDE-RHAMNOSE SYNTHASE/EPIMERASE-REDUCTASE) | chr1:23346175-23347524 FORWARD affx|C37_14217;	1.37759
10.6.1	cell wall.degradation.cellulases and beta -1,4-glucanases	cit.27033.1.s1_at;	weakly similar to ( 103)AT3G47040| Symbols: | glycosyl hydrolase family 3 protein | chr3:17335216-17338090 REVERSE affx|C37_35089;	-1.73578
10.6.1	cell wall.degradation.cellulases and beta -1,4-glucanases	cit.5485.1.s1_s_at;	moderately similar to ( 447)AT5G04885| Symbols: | glycosyl hydrolase family 3 protein | chr5:1423370-1426629 FORWARD affx|C37_06976;	1.59836
10.6.1	cell wall.degradation.cellulases and beta -1,4-glucanases	cit.30208.1.s1_at;	moderately similar to ( 284)AT5G20950| Symbols: | glycosyl hydrolase family 3 protein | chr5:7107611-7110777 REVERSE affx|C37_09825;	2.00888
10.6.1	cell wall.degradation.cellulases and beta -1,4-glucanases	cit.5485.1.s1_at;	moderately similar to ( 447)AT5G04885| Symbols: | glycosyl hydrolase family 3 protein | chr5:1423370-1426629 FORWARD affx|C37_06976;	1.5659
10.6.1	cell wall.degradation.cellulases and beta -1,4-glucanases	cit.22234.1.s1_s_at;	moderately similar to ( 306)AT5G20950| Symbols: | glycosyl hydrolase family 3 protein | chr5:7107611-7110777 REVERSE affx|C37_30720;	2.55869
10.6.2	cell wall.degradation.mannan-xylose-arabinose-fucose	cit.4211.1.s1_at;	moderately similar to ( 433)AT1G02640| Symbols: ATBXL2, BXL2 | BXL2 (BETA-XYLOSIDASE 2); hydrolase, hydrolyzing O-glycosyl compounds | chr1:564293-567580 FORWARDmoderately similar to ( 414)XYNB_PRUPE affx|C37_05337;	2.74604
10.6.2	cell wall.degradation.mannan-xylose-arabinose-fucose	cit.4483.1.s1_s_at;	moderately similar to ( 284)AT5G64570| Symbols: ATBXL4, XYL4 | XYL4 (beta-xylosidase 4); hydrolase, hydrolyzing O-glycosyl compounds | chr5:25827453-25830535 REVERSEweakly similar to ( 177)XYNB_PRUPE affx|C37_05684;	1.85638
10.6.3	cell wall.degradation.pectate lyases and polygalacturonases	cit.30343.1.s1_at;	moderately similar to ( 215)AT3G62110| Symbols: | glycoside hydrolase family 28 protein / polygalacturonase (pectinase) family protein | chr3:23008288-23010478 REVERSE affx|C37_10564;	1.36524
10.6.3	cell wall.degradation.pectate lyases and polygalacturonases	cit.25554.1.s1_at;	moderately similar to ( 233)AT1G10640| Symbols: | polygalacturonase, putative / pectinase, putative | chr1:3515479-3516932 REVERSEvery weakly similar to (90.9)PGLR_MALDO affx|C37_30890;	1.82466
10.6.3	cell wall.degradation.pectate lyases and polygalacturonases	cit.4516.1.s1_s_at;	highly similar to ( 712)AT4G23500| Symbols: | glycoside hydrolase family 28 protein / polygalacturonase (pectinase) family protein | chr4:12264650-12267084 FORWARDvery weakly similar to (93.6)PGLR2_MAIZE affx|C37_05726;	1.95904
10.6.3	cell wall.degradation.pectate lyases and polygalacturonases	cit.1988.1.s1_s_at;	highly similar to ( 803)AT1G70370| Symbols: | BURP domain-containing protein / polygalacturonase, putative | chr1:26516666-26518661 REVERSE affx|C37_02507;	2.47468
10.6.3	cell wall.degradation.pectate lyases and polygalacturonases	cit.24023.1.s1_s_at;	moderately similar to ( 289)AT5G04310| Symbols: | pectate lyase family protein | chr5:1203357-1207353 REVERSEweakly similar to ( 191)PEL_LILLO affx|C37_40347;	1.71753
10.6.3	cell wall.degradation.pectate lyases and polygalacturonases	cit.1988.1.s1_at;	highly similar to ( 803)AT1G70370| Symbols: | BURP domain-containing protein / polygalacturonase, putative | chr1:26516666-26518661 REVERSE affx|C37_02507;	1.944
10.6.3	cell wall.degradation.pectate lyases and polygalacturonases	cit.23635.1.s1_at;	moderately similar to ( 287)AT3G42950| Symbols: | glycoside hydrolase family 28 protein / polygalacturonase (pectinase) family protein | chr3:15026371-15028788 FORWARD affx|C37_38864;	1.28692
10.6.3	cell wall.degradation.pectate lyases and polygalacturonases	cit.18784.1.s1_at;	weakly similar to ( 107)AT1G02460| Symbols: | glycoside hydrolase family 28 protein / polygalacturonase (pectinase) family protein | chr1:504897-507099 REVERSE affx|C37_25516;	1.5952
10.6.3	cell wall.degradation.pectate lyases and polygalacturonases	cit.9239.1.s1_at;	moderately similar to ( 333)AT5G25610| Symbols: RD22 | RD22 (RESPONSIVE TO DESSICATION 22) | chr5:8914501-8916687 REVERSEweakly similar to ( 121)EA30_VICFA affx|C37_12574;	-1.37354
10.6.3	cell wall.degradation.pectate lyases and polygalacturonases	cit.21736.1.s1_at;	weakly similar to ( 115)AT3G57790| Symbols: | glycoside hydrolase family 28 protein / polygalacturonase (pectinase) family protein | chr3:21416364-21418065 REVERSE affx|C37_26899;	1.24101
10.6.3	cell wall.degradation.pectate lyases and polygalacturonases	cit.3582.1.s1_s_at;	highly similar to ( 591)AT3G55140| Symbols: | pectate lyase family protein | chr3:20450037-20451202 FORWARDweakly similar to ( 157)PEL_TOBAC affx|C37_04520;	1.20128
10.6.3	cell wall.degradation.pectate lyases and polygalacturonases	cit.3581.1.s1_at;	moderately similar to ( 416)AT3G55140| Symbols: | pectate lyase family protein | chr3:20450037-20451202 FORWARDweakly similar to ( 105)PEL_LILLO affx|C37_04519;	1.29847
11.3	lipid metabolism.Phospholipid synthesis	cit.11122.1.s1_at;	moderately similar to ( 208)AT3G57650| Symbols: LPAT2 | LPAT2 (Lysophosphatidyl acyltransferase 2); 1-acylglycerol-3-phosphate O-acyltransferase | chr3:21360728-21363816 FORWARDmoderately similar to ( 204)LPAT2_BRANA affx|C37_14895;	1.25328
11.3	lipid metabolism.Phospholipid synthesis	cit.24179.1.s1_at;	moderately similar to ( 271)AT3G18850| Symbols: LPAT5 | LPAT5 | chr3:6499535-6500846 REVERSEweakly similar to ( 114)LPAT2_BRAOL affx|C37_40759;	-1.55607
11.3	lipid metabolism.Phospholipid synthesis	cit.14955.1.s1_at;	weakly similar to ( 187)AT3G57650| Symbols: LPAT2 | LPAT2 (Lysophosphatidyl acyltransferase 2); 1-acylglycerol-3-phosphate O-acyltransferase | chr3:21360728-21363816 FORWARDweakly similar to ( 189)LPAT2_BRANA affx|C37_19850;	-1.70393
11.3	lipid metabolism.Phospholipid synthesis	cit.15276.1.s1_at;	moderately similar to ( 214)AT2G46090| Symbols: | diacylglycerol kinase family protein | chr2:18957992-18960152 FORWARD affx|C37_20349;	-1.23355
11.3.2	lipid metabolism.Phospholipid synthesis.choline kinase	cit.12433.1.s1_s_at;	moderately similar to ( 483)AT4G09760| Symbols: | choline kinase, putative | chr4:6148952-6151147 REVERSE affx|C37_16535;	1.83132
11.3.5	lipid metabolism.Phospholipid synthesis.diacylglycerol kinase	cit.28549.1.s1_s_at;	moderately similar to ( 312)AT2G20900| Symbols: | diacylglycerol kinase, putative | chr2:8996493-8999879 REVERSE affx|C37_39869;	1.47967
11.3.5	lipid metabolism.Phospholipid synthesis.diacylglycerol kinase	cit.10998.1.s1_s_at;	highly similar to ( 703)AT5G57690| Symbols: | diacylglycerol kinase | chr5:23389289-23391695 REVERSE affx|C37_14740;	1.46817
11.3.5	lipid metabolism.Phospholipid synthesis.diacylglycerol kinase	cit.28292.1.s1_s_at;	moderately similar to ( 209)AT5G07920| Symbols: ATDGK1 | DGK1 (DIACYLGLYCEROL KINASE 1, DIACYLGLYCEROL KINASE1); diacylglycerol kinase | chr5:2525198-2528397 REVERSE affx|C37_38559;	1.85235
11.3.5	lipid metabolism.Phospholipid synthesis.diacylglycerol kinase	cit.10996.1.s1_at;	moderately similar to ( 223)AT5G57690| Symbols: | diacylglycerol kinase | chr5:23389289-23391695 REVERSE affx|C37_14738;	-2.16302
11.3.5	lipid metabolism.Phospholipid synthesis.diacylglycerol kinase	cit.28292.1.s1_at;	moderately similar to ( 209)AT5G07920| Symbols: ATDGK1 | DGK1 (DIACYLGLYCEROL KINASE 1, DIACYLGLYCEROL KINASE1); diacylglycerol kinase | chr5:2525198-2528397 REVERSE affx|C37_38559;	1.62922
11.3.7	lipid metabolism.Phospholipid synthesis.cyclopropane-fatty-acyl-phospholipid synthase	cit.22399.1.s1_at;	moderately similar to ( 211)AT3G23510| Symbols: | cyclopropane fatty acid synthase, putative / CPA-FA synthase, putative | chr3:8428078-8433166 FORWARD affx|C37_31549;	-2.37779
11.3.7	lipid metabolism.Phospholipid synthesis.cyclopropane-fatty-acyl-phospholipid synthase	cit.38855.1.s1_at;	moderately similar to ( 224)AT3G23530| Symbols: | cyclopropane fatty acid synthase, putative / CPA-FA synthase, putative | chr3:8437479-8442604 FORWARD affx|C37_44831;	-2.26807
11.3.8	lipid metabolism.Phospholipid synthesis.phosphatidylserine decarboxylase	cit.4899.1.s1_s_at;	moderately similar to ( 279)AT4G25970| Symbols: PSD3 | PSD3 (PHOSPHATIDYLSERINE DECARBOXYLASE 3); calcium ion binding / phosphatidylserine decarboxylase | chr4:13184249-13189148 FORWARD affx|C37_06210;	-1.40284
11.3.8	lipid metabolism.Phospholipid synthesis.phosphatidylserine decarboxylase	cit.4898.1.s1_at;	moderately similar to ( 254)AT4G25970| Symbols: PSD3 | PSD3 (PHOSPHATIDYLSERINE DECARBOXYLASE 3); calcium ion binding / phosphatidylserine decarboxylase | chr4:13184249-13189148 FORWARD affx|C37_06209;	-1.36629
11.3.10	lipid metabolism.Phospholipid synthesis.(S)-coclaurine-N-methyltransferase	cit.16800.1.s1_at;	weakly similar to ( 124)AT4G33110| Symbols: | coclaurine N-methyltransferase, putative | chr4:15972500-15974534 REVERSE affx|C37_22888;	-2.00675
11.4	lipid metabolism.TAG synthesis	cit.9519.1.s1_s_at;	weakly similar to ( 128)AT3G01570| Symbols: | glycine-rich protein / oleosin | chr3:222159-222785 REVERSEweakly similar to ( 147)OLEO6_GOSHI affx|C37_12915;	-1.58675
11.10.2	lipid metabolism.glycolipid synthesis.DGDG synthase	cit.7437.1.s1_at;	moderately similar to ( 243)AT4G00550| Symbols: DGD2 | DGD2 (digalactosyldiacylglycerol synthase 2); digalactosyldiacylglycerol synthase / transferase, transferring glycosyl groups | chr4:238154-240019 REVERSEmoderately similar to ( 258)DGDG2_SOYBN affx|C37_10086;	-1.23334
11.10.2	lipid metabolism.glycolipid synthesis.DGDG synthase	cit.6606.1.s1_at;	moderately similar to ( 379)AT3G11670| Symbols: DGD1 | DGD1 (DIGALACTOSYL DIACYLGLYCEROL DEFICIENT 1); galactolipid galactosyltransferase | chr3:3681685-3684501 REVERSEmoderately similar to ( 433)DGDG1_SOYBN affx|C37_08641;	-1.86842
11.10.3	lipid metabolism.glycolipid synthesis.UDP-sulfoquinovose synthase	cit.15620.1.s1_at;	weakly similar to ( 122)AT4G33030| Symbols: SQD1 | SQD1 (sulfoquinovosyldiacylglycerol 1); UDPsulfoquinovose synthase | chr4:15936054-15937569 FORWARDweakly similar to ( 126)SQD1_SPIOL affx|C37_20909;	-2.62257
11.10.3	lipid metabolism.glycolipid synthesis.UDP-sulfoquinovose synthase	cit.31612.1.s1_s_at;	moderately similar to ( 303)AT4G33030| Symbols: SQD1 | SQD1 (sulfoquinovosyldiacylglycerol 1); UDPsulfoquinovose synthase | chr4:15936054-15937569 FORWARDmoderately similar to ( 312)SQD1_SPIOL affx|C37_23051;	-2.0245
11.8	lipid metabolism.''exotics'' (steroids, squalene etc)	cit.19616.1.s1_s_at;	weakly similar to ( 161)AT5G58800| Symbols: | quinone reductase family protein | chr5:23763258-23764121 REVERSE affx|C37_28433;	1.34532
11.8	lipid metabolism.''exotics'' (steroids, squalene etc)	cit.5334.1.s1_at;	moderately similar to ( 319)AT5G58800| Symbols: | quinone reductase family protein | chr5:23763258-23764121 REVERSE affx|C37_06751;	1.34089
11.8	lipid metabolism.''exotics'' (steroids, squalene etc)	cit.3498.1.s1_at;	moderately similar to ( 316)AT5G07010| Symbols: | sulfotransferase family protein | chr5:2174961-2176040 REVERSE affx|C37_04422;	-3.09198
11.8.1	lipid metabolism.''exotics'' (steroids, squalene etc).sphingolipids	cit.3647.1.s1_at;	highly similar to ( 562)AT4G04930| Symbols: DES-1-LIKE | DES-1-LIKE (fatty acid desaturase 1-like); oxidoreductase | chr4:2509234-2510916 FORWARD affx|C37_04602;	1.346
11.8.1	lipid metabolism.''exotics'' (steroids, squalene etc).sphingolipids	cit.13814.1.s1_at;	moderately similar to ( 330)AT1G69640| Symbols: | acid phosphatase, putative | chr1:26197596-26199129 REVERSE affx|C37_18281;	1.30513
11.8.1	lipid metabolism.''exotics'' (steroids, squalene etc).sphingolipids	cit.12455.1.s1_s_at;	highly similar to ( 828)AT1G27980| Symbols: | pyridoxal-dependent decarboxylase family protein | chr1:9748799-9752605 FORWARDhighly similar to ( 753)SGPL_ORYSA affx|C37_16562;	1.19841
11.8.1	lipid metabolism.''exotics'' (steroids, squalene etc).sphingolipids	cit.20240.1.s1_at;	weakly similar to ( 122)AT1G13580| Symbols: LAG13 | LAG13 (LAG1 LONGEVITY ASSURANCE HOMOLOG 3) | chr1:4645003-4646762 REVERSEweakly similar to ( 103)ASCL2_ORYSA affx|C37_34768;	-1.59439
11.8.1.2	lipid metabolism.''exotics'' (steroids, squalene etc).sphingolipids.serine C-palmitoyltransferase	cit.4147.1.s1_s_at;	moderately similar to ( 237)AT3G48780| Symbols: | serine C-palmitoyltransferase, putative | chr3:18100331-18103261 FORWARD affx|C37_05256;	1.60799
11.8.1.3	lipid metabolism.''exotics'' (steroids, squalene etc).sphingolipids.ceramide glucosyltransferase	cit.31174.1.s1_at;	moderately similar to ( 259)AT2G19880| Symbols: | ceramide glucosyltransferase, putative | chr2:8588660-8592200 FORWARD affx|C37_21177;	1.36751
11.8.3	lipid metabolism.''exotics'' (steroids, squalene etc).UDP-glucose:sterol glucosyltransferase	cit.7479.1.s1_at;	moderately similar to ( 250)AT1G43620| Symbols: | UDP-glucose:sterol glucosyltransferase, putative | chr1:16428094-16431940 REVERSE affx|C37_10156;	-1.3118
11.8.10	lipid metabolism.'exotics' (steroids, squalene etc).phosphatidylcholinesterol O-acyltransferase	cit.15292.1.s1_at;	highly similar to ( 526)AT1G27480| Symbols: | lecithin:cholesterol acyltransferase family protein / LACT family protein | chr1:9544594-9546155 FORWARD affx|C37_20376;	-2.15033
11.8.10	lipid metabolism.'exotics' (steroids, squalene etc).phosphatidylcholinesterol O-acyltransferase	cit.30019.1.s1_at;	moderately similar to ( 228)AT3G44830| Symbols: | lecithin:cholesterol acyltransferase family protein / LACT family protein | chr3:16379875-16383341 FORWARD affx|C37_09029;	-1.9379
11.2.3	lipid metabolism.FA desaturation.omega 3 desaturase	cit.2274.1.s1_at;	moderately similar to ( 474)AT2G29980| Symbols: FAD3 | FAD3 (FATTY ACID DESATURASE 3); omega-3 fatty acid desaturase | chr2:12789334-12792023 REVERSEmoderately similar to ( 483)FAD3E_BRANA affx|C37_02865;	-1.63924
11.1.1	lipid metabolism.FA synthesis and FA elongation.Acetyl CoA Carboxylation	cit.6520.1.s1_at;	weakly similar to ( 141)AT1G36160| Symbols: AT-ACC1, EMB22, GK, PAS3, ACC1 | ACC1 (ACETYL-COENZYME A CARBOXYLASE 1); acetyl-CoA carboxylase | chr1:13535408-13544985 FORWARD affx|C37_08509;	-1.77802
11.1.1	lipid metabolism.FA synthesis and FA elongation.Acetyl CoA Carboxylation	cit.39114.1.s1_at;	weakly similar to ( 155)AT3G15690| Symbols: | biotin carboxyl carrier protein of acetyl-CoA carboxylase-related | chr3:5317115-5319442 FORWARD affx|C37_45337;	-1.31221
11.1.3	lipid metabolism.FA synthesis and FA elongation.ketoacyl ACP synthase	cit.4195.1.s1_at;	highly similar to ( 589)AT1G74960| Symbols: KAS2, FAB1 | FAB1 (FATTY ACID BIOSYNTHESIS 1); fatty-acid synthase | chr1:28156225-28159609 REVERSEmoderately similar to ( 354)KASC1_HORVU affx|C37_05314;	-1.63338
11.1.7	lipid metabolism.FA synthesis and FA elongation.ACP thioesterase	cit.28394.1.s1_s_at;	very weakly similar to (98.2)AT1G08510| Symbols: FATB | FATB (FATTY ACYL-ACP THIOESTERASES B); acyl carrier/ acyl-ACP thioesterase | chr1:2691549-2693412 REVERSEweakly similar to ( 105)FATB_GOSHI affx|C37_39202;	-1.29455
11.1.7	lipid metabolism.FA synthesis and FA elongation.ACP thioesterase	cit.28394.1.s1_at;	very weakly similar to (98.2)AT1G08510| Symbols: FATB | FATB (FATTY ACYL-ACP THIOESTERASES B); acyl carrier/ acyl-ACP thioesterase | chr1:2691549-2693412 REVERSEweakly similar to ( 105)FATB_GOSHI affx|C37_39202;	-1.26301
11.1.8	lipid metabolism.FA synthesis and FA elongation.acyl coa ligase	cit.3706.1.s1_at;	highly similar to ( 930)AT3G16910| Symbols: AAE7, ACN1 | AAE7/ACN1 (ACYL-ACTIVATING ENZYME 7); AMP binding / acetate-CoA ligase | chr3:5773237-5775417 REVERSEweakly similar to ( 141)4CL2_PETCR affx|C37_04680;	1.88917
11.1.8	lipid metabolism.FA synthesis and FA elongation.acyl coa ligase	cit.3705.1.s1_s_at;	moderately similar to ( 298)AT3G16910| Symbols: AAE7, ACN1 | AAE7/ACN1 (ACYL-ACTIVATING ENZYME 7); AMP binding / acetate-CoA ligase | chr3:5773237-5775417 REVERSEvery weakly similar to (96.3)4CL1_ORYSA affx|C37_04679;	1.67098
11.1.8	lipid metabolism.FA synthesis and FA elongation.acyl coa ligase	cit.14076.1.s1_at;	moderately similar to ( 296)AT1G55320| Symbols: | similar to acyl-activating enzyme 17 (AAE17) [Arabidopsis thaliana] (TAIR:AT5G23050.1); similar to acyl-activating enzyme 18, putative, expressed [Oryza sativa (japonica cultivar-group)] (GB:ABF99434.1); similar to unnamed protein product [Vitis vinifera] (GB:CAO22055.1); similar to unnamed protein product [Vitis vinifera] (GB:CAO22056.1); contain…	-1.43801
11.1.8	lipid metabolism.FA synthesis and FA elongation.acyl coa ligase	cit.22103.1.s1_s_at;	very weakly similar to (98.2)AT1G55320| Symbols: | similar to acyl-activating enzyme 17 (AAE17) [Arabidopsis thaliana] (TAIR:AT5G23050.1); similar to acyl-activating enzyme 18, putative, expressed [Oryza sativa (japonica cultivar-group)] (GB:ABF99434.1); similar to unnamed protein product [Vitis vinifera] (GB:CAO22055.1); similar to unnamed protein product [Vitis vinifera] (GB:CAO22056.1); contai…	-1.57017
11.1.9	lipid metabolism.FA synthesis and FA elongation.long chain fatty acid CoA ligase	cit.13656.1.s1_s_at;	weakly similar to ( 172)AT2G04350| Symbols: | long-chain-fatty-acid--CoA ligase family protein / long-chain acyl-CoA synthetase family protein (LACS8) | chr2:1516083-1519175 FORWARD affx|C37_18068;	-1.36968
11.1.9	lipid metabolism.FA synthesis and FA elongation.long chain fatty acid CoA ligase	cit.6971.1.s1_at;	moderately similar to ( 327)AT1G77590| Symbols: LACS9 | LACS9 (LONG CHAIN ACYL-COA SYNTHETASE 9); long-chain-fatty-acid-CoA ligase | chr1:29153395-29156670 REVERSE affx|C37_09260;	-2.15924
11.1.9	lipid metabolism.FA synthesis and FA elongation.long chain fatty acid CoA ligase	cit.28265.1.s1_s_at;	moderately similar to ( 251)AT3G05970| Symbols: LACS6 | LACS6 (LONG-CHAIN ACYL-COA SYNTHETASE 6) | chr3:1786516-1791752 REVERSE affx|C37_38478;	-1.44046
11.1.10	lipid metabolism.FA synthesis and FA elongation.beta ketoacyl CoA synthase	cit.23766.1.s1_s_at;	weakly similar to ( 138)AT1G68530| Symbols: CER6, G2, POP1, CUT1 | CUT1 (CUTICULAR 1); catalytic | chr1:25717263-25718396 REVERSE affx|C37_39188;	-1.38909
11.1.10	lipid metabolism.FA synthesis and FA elongation.beta ketoacyl CoA synthase	cit.26284.1.s1_at;	weakly similar to ( 129)AT5G43760| Symbols: | beta-ketoacyl-CoA synthase, putative | chr5:17603130-17605713 FORWARD affx|C37_33021;	-2.698
11.1.11	lipid metabolism.FA synthesis and FA elongation.fatty acid elongase	cit.15681.1.s1_at;	moderately similar to ( 338)AT4G13840| Symbols: | transferase family protein | chr4:8014084-8016322 REVERSE affx|C37_21008;	-1.58131
11.1.12	lipid metabolism.FA synthesis and FA elongation.ACP protein	cit.3679.1.s1_at;	weakly similar to ( 183)AT2G44620| Symbols: MTACP1, mtACP-1 | mtACP-1 (MITOCHONDRIAL ACYL CARRIER PROTEIN 1); acyl carrier | chr2:18421396-18422141 FORWARD affx|C37_04643;	1.29522
11.1.12	lipid metabolism.FA synthesis and FA elongation.ACP protein	cit.9834.1.s1_s_at;	weakly similar to ( 102)AT4G25050| Symbols: ACP4 | ACP4 (ACYL CARRIER PROTEIN 4) | chr4:12870188-12871034 FORWARDweakly similar to ( 109)ACP1_HORVU affx|C37_13302;	1.36786
11.1.13	lipid metabolism.FA synthesis and FA elongation.acyl-CoA binding protein	cit.23208.1.s1_s_at;	weakly similar to ( 135)AT1G31812| Symbols: ACBP | ACBP (ACYL-COA-BINDING PROTEIN); acyl-CoA binding | chr1:11411113-11412080 REVERSEweakly similar to ( 159)ACBP_RICCO affx|C37_36616;	1.33449
11.1.15	lipid metabolism.FA synthesis and FA elongation.ACP desaturase	cit.4145.1.s1_at;	highly similar to ( 556)AT1G43800| Symbols: | acyl-(acyl-carrier-protein) desaturase, putative / stearoyl-ACP desaturase, putative | chr1:16580102-16581989 FORWARDmoderately similar to ( 493)STAD_RICCO affx|C37_05254;	5.98021
11.1.15	lipid metabolism.FA synthesis and FA elongation.ACP desaturase	cit.29453.1.s1_s_at;	weakly similar to ( 151)AT2G43710| Symbols: FAB2, SSI2 | SSI2 (fatty acid biosynthesis 2); acyl-[acyl-carrier-protein] desaturase | chr2:18127184-18129572 FORWARDweakly similar to ( 168)STAD_CUCSA affx|C37_02574;	-1.19545
11.1.15	lipid metabolism.FA synthesis and FA elongation.ACP desaturase	cit.2040.1.s1_at;	moderately similar to ( 276)AT3G02630| Symbols: | acyl-(acyl-carrier-protein) desaturase, putative / stearoyl-ACP desaturase, putative | chr3:562171-564531 FORWARDmoderately similar to ( 286)STAD_RICCO affx|C37_02571;	-1.66086
11.1.15	lipid metabolism.FA synthesis and FA elongation.ACP desaturase	cit.2041.1.s1_s_at;	moderately similar to ( 420)AT3G02630| Symbols: | acyl-(acyl-carrier-protein) desaturase, putative / stearoyl-ACP desaturase, putative | chr3:562171-564531 FORWARDmoderately similar to ( 426)STAD_SOYBN affx|C37_02573;	-1.63085
11.1.15	lipid metabolism.FA synthesis and FA elongation.ACP desaturase	cit.16254.1.s1_at;	moderately similar to ( 290)AT3G02630| Symbols: | acyl-(acyl-carrier-protein) desaturase, putative / stearoyl-ACP desaturase, putative | chr3:562171-564531 FORWARDmoderately similar to ( 286)STAD_SPIOL affx|C37_22036;	-1.33805
11.1.30	lipid metabolism.FA synthesis and FA elongation.pyruvate kinase	cit.23070.1.s1_at;	moderately similar to ( 222)AT3G22960| Symbols: PKP1, PKP-ALPHA | PKP-ALPHA/PKP1 (PLASTIDIAL PYRUVATE KINASE 1); pyruvate kinase | chr3:8139376-8141778 FORWARDmoderately similar to ( 230)KPYA_RICCO affx|C37_34943;	1.49817
11.9.2	lipid metabolism.lipid degradation.lipases	cit.21913.1.s1_s_at;	weakly similar to ( 122)AT2G44970| Symbols: | lipase-related | chr2:18556074-18559094 REVERSE affx|C37_29479;	1.52996
11.9.2	lipid metabolism.lipid degradation.lipases	cit.7545.1.s1_at;	moderately similar to ( 447)AT1G11090| Symbols: | hydrolase, alpha/beta fold family protein | chr1:3702655-3703629 FORWARD affx|C37_10257;	-1.36604
11.9.2	lipid metabolism.lipid degradation.lipases	cit.2293.1.s1_s_at;	moderately similar to ( 496)AT5G19290| Symbols: | esterase/lipase/thioesterase family protein | chr5:6494115-6495107 FORWARD affx|C37_02886;	-1.31087
11.9.2	lipid metabolism.lipid degradation.lipases	cit.4362.1.s1_at;	highly similar to ( 516)AT5G11650| Symbols: | hydrolase, alpha/beta fold family protein | chr5:3745070-3746817 FORWARD affx|C37_05538;	-1.3616
11.9.2	lipid metabolism.lipid degradation.lipases	cit.21913.1.s1_at;	weakly similar to ( 122)AT2G44970| Symbols: | lipase-related | chr2:18556074-18559094 REVERSE affx|C37_29479;	1.76572
11.9.2	lipid metabolism.lipid degradation.lipases	cit.2292.1.s1_at;	moderately similar to ( 221)AT5G19290| Symbols: | esterase/lipase/thioesterase family protein | chr5:6494115-6495107 FORWARD affx|C37_02885;	-1.29084
11.9.2	lipid metabolism.lipid degradation.lipases	cit.16331.1.s1_s_at;	weakly similar to ( 151)AT3G62860| Symbols: | esterase/lipase/thioesterase family protein | chr3:23250552-23253118 REVERSE affx|C37_22154;	-1.64217
11.9.2.1	lipid metabolism.lipid degradation.lipases.triacylglycerol lipase	cit.37944.1.s1_at;	very weakly similar to (88.2)AT4G13550| Symbols: | lipase class 3 family protein | chr4:7871247-7876873 REVERSE affx|C37_43866;	-1.57515
11.9.2.1	lipid metabolism.lipid degradation.lipases.triacylglycerol lipase	cit.38213.1.s1_at;	weakly similar to ( 149)AT1G30370| Symbols: | lipase class 3 family protein | chr1:10719151-10720740 REVERSE affx|C37_44140;	-2.02915
11.9.2.1	lipid metabolism.lipid degradation.lipases.triacylglycerol lipase	cit.15152.1.s1_at;	highly similar to ( 553)AT5G50890| Symbols: | similar to lipase class 3 family protein [Arabidopsis thaliana] (TAIR:AT2G05260.1); similar to unnamed protein product [Vitis vinifera] (GB:CAO69997.1); contains domain SSF53474 (SSF53474) | chr5:20719910-20721461 FORWARD affx|C37_20153;	1.30654
11.9.2.1	lipid metabolism.lipid degradation.lipases.triacylglycerol lipase	cit.15370.1.s1_at;	moderately similar to ( 206)AT3G07400| Symbols: | lipase class 3 family protein | chr3:2367462-2372244 FORWARD affx|C37_20497;	1.61224
11.9.3.1	lipid metabolism.lipid degradation.lysophospholipases.phospholipase D	cit.6097.1.s1_s_at;	highly similar to ( 581)AT2G42010| Symbols: PLDBETA, PLDBETA1 | PLDBETA1 (PHOSPHOLIPASE D BETA 1); phospholipase D | chr2:17540096-17545068 REVERSEmoderately similar to ( 341)PLDA1_MAIZE affx|C37_07837;	1.76641
11.9.3.3	lipid metabolism.lipid degradation.lysophospholipases.glycerophosphodiester phosphodiesterase	cit.6647.1.s1_s_at;	moderately similar to ( 383)AT5G41080| Symbols: | glycerophosphoryl diester phosphodiesterase family protein | chr5:16459217-16461063 FORWARD affx|C37_08714;	1.94579
11.9.3.5	lipid metabolism.lipid degradation.lysophospholipases.phosphoinositide phospholipase C	cit.32238.1.s1_at;	weakly similar to ( 113)AT5G66020| Symbols: IBS2, ATSAC1B | ATSAC1B/IBS2 (IMPAIRED IN BABA-INDUCED STERILITY 2); phosphoinositide 5-phosphatase | chr5:26418419-26421917 REVERSE affx|C37_23848;	1.47025
11.9.4.5	lipid metabolism.lipid degradation.beta-oxidation.acyl-CoA thioesterase	cit.4377.1.s1_at;	moderately similar to ( 290)AT1G47480| Symbols: | hydrolase | chr1:17420063-17421736 FORWARDweakly similar to ( 106)GID1_ORYSA affx|C37_05556;	1.41056
11.9.4.5	lipid metabolism.lipid degradation.beta-oxidation.acyl-CoA thioesterase	cit.30789.1.s1_s_at;	moderately similar to ( 324)AT2G45600| Symbols: | hydrolase | chr2:18796873-18797862 FORWARDweakly similar to ( 136)GID1_ORYSA affx|C37_17917;	-1.65526
11.9.4.5	lipid metabolism.lipid degradation.beta-oxidation.acyl-CoA thioesterase	cit.13050.1.s1_at;	moderately similar to ( 293)AT5G62180| Symbols: ATCXE20 | ATCXE20 (ARABIDOPSIS THALIANA CARBOXYESTERASE 20); carboxylesterase | chr5:24996092-24997075 REVERSEweakly similar to ( 120)GID1_ORYSA affx|C37_17295;	-1.34402
11.9.4.5	lipid metabolism.lipid degradation.beta-oxidation.acyl-CoA thioesterase	cit.7744.1.s1_at;	moderately similar to ( 206)AT3G48690| Symbols: ATCXE12 | ATCXE12 (ARABIDOPSIS THALIANA CARBOXYESTERASE 12); carboxylesterase | chr3:18048171-18049145 REVERSEvery weakly similar to (94.4)GID1_ORYSA affx|C37_10576;	-1.32447
11.9.4.5	lipid metabolism.lipid degradation.beta-oxidation.acyl-CoA thioesterase	cit.14558.1.s1_at;	highly similar to ( 539)AT5G27320| Symbols: ATGID1C, GID1C | ATGID1C/GID1C (GA INSENSITIVE DWARF1C); hydrolase | chr5:9629257-9630749 FORWARDmoderately similar to ( 429)GID1_ORYSA affx|C37_19295;	-1.3673
11.9.4.5	lipid metabolism.lipid degradation.beta-oxidation.acyl-CoA thioesterase	cit.1400.1.s1_s_at;	moderately similar to ( 350)AT3G48690| Symbols: ATCXE12 | ATCXE12 (ARABIDOPSIS THALIANA CARBOXYESTERASE 12); carboxylesterase | chr3:18048171-18049145 REVERSEweakly similar to ( 128)GID1_ORYSA affx|C37_01765;	-1.22705
11.9.4.5	lipid metabolism.lipid degradation.beta-oxidation.acyl-CoA thioesterase	cit.13050.1.s1_s_at;	moderately similar to ( 293)AT5G62180| Symbols: ATCXE20 | ATCXE20 (ARABIDOPSIS THALIANA CARBOXYESTERASE 20); carboxylesterase | chr5:24996092-24997075 REVERSEweakly similar to ( 120)GID1_ORYSA affx|C37_17295;	-1.39236
11.9.4.5	lipid metabolism.lipid degradation.beta-oxidation.acyl-CoA thioesterase	cit.13536.1.s1_at;	moderately similar to ( 347)AT2G45600| Symbols: | hydrolase | chr2:18796873-18797862 FORWARDweakly similar to ( 139)GID1_ORYSA affx|C37_17918;	-1.8718
11.9.4.5	lipid metabolism.lipid degradation.beta-oxidation.acyl-CoA thioesterase	cit.13049.1.s1_at;	moderately similar to ( 287)AT5G62180| Symbols: ATCXE20 | ATCXE20 (ARABIDOPSIS THALIANA CARBOXYESTERASE 20); carboxylesterase | chr5:24996092-24997075 REVERSEweakly similar to ( 118)GID1_ORYSA affx|C37_17294;	-1.50212
11.9.4.5	lipid metabolism.lipid degradation.beta-oxidation.acyl-CoA thioesterase	cit.12749.1.s1_at;	weakly similar to ( 199)AT1G47480| Symbols: | hydrolase | chr1:17420063-17421736 FORWARDvery weakly similar to (95.5)GID1_ORYSA affx|C37_16943;	1.74306
11.9.4.9	lipid metabolism.lipid degradation.beta-oxidation.mutifunctional	cit.10786.1.s1_s_at;	highly similar to ( 659)AT4G29010| Symbols: AIM1 | AIM1 (ABNORMAL INFLORESCENCE MERISTEM); enoyl-CoA hydratase | chr4:14297318-14302022 REVERSEhighly similar to ( 613)MFP_ORYSA affx|C37_14481;	1.29747
2.1.2.1	major CHO metabolism.synthesis.starch.AGPase	cit.13437.1.s1_s_at;	highly similar to ( 757)AT4G39210| Symbols: APL3 | APL3 (large subunit of AGP 3) | chr4:18260326-18263175 FORWARDhighly similar to ( 773)GLGL1_SOLTU affx|C37_17792;	-1.79851
2.1.2.1	major CHO metabolism.synthesis.starch.AGPase	cit.9213.1.s1_at;	highly similar to ( 875)AT5G48300| Symbols: APS1, ADG1 | ADG1 (ADP GLUCOSE PYROPHOSPHORYLASE SMALL SUBUNIT 1); glucose-1-phosphate adenylyltransferase | chr5:19587552-19589783 FORWARDhighly similar to ( 901)GLGS2_VICFA affx|C37_12541;	-1.24934
2.1.2.1	major CHO metabolism.synthesis.starch.AGPase	cit.13072.1.s1_at;	moderately similar to ( 209)AT1G27680| Symbols: APL2 | APL2 (large subunit of AGP 2) | chr1:9631617-9634437 FORWARDmoderately similar to ( 214)GLGL1_BETVU affx|C37_17319;	-1.3528
2.1.2.1	major CHO metabolism.synthesis.starch.AGPase	cit.9211.1.s1_at;	moderately similar to ( 322)AT5G48300| Symbols: APS1, ADG1 | ADG1 (ADP GLUCOSE PYROPHOSPHORYLASE SMALL SUBUNIT 1); glucose-1-phosphate adenylyltransferase | chr5:19587552-19589783 FORWARDmoderately similar to ( 330)GLGS2_VICFA affx|C37_12539;	-1.50912
2.1.2.1	major CHO metabolism.synthesis.starch.AGPase	cit.13071.1.s1_s_at;	moderately similar to ( 432)AT1G27680| Symbols: APL2 | APL2 (large subunit of AGP 2) | chr1:9631617-9634437 FORWARDmoderately similar to ( 439)GLGL1_BETVU affx|C37_17318;	-1.24286
2.1.2.2	major CHO metabolism.synthesis.starch.starch synthase	cit.9504.1.s1_s_at;	highly similar to ( 832)AT1G32900| Symbols: | starch synthase, putative | chr1:11920562-11923486 REVERSEhighly similar to ( 867)SSG1_ANTMA affx|C37_12894;	-1.62213
2.1.2.2	major CHO metabolism.synthesis.starch.starch synthase	cit.18983.1.s1_at;	very weakly similar to (90.5)AT4G18240| Symbols: ATSS4, SSIV | ATSS4/SSIV (STARCH SYNTHASE 4); transferase, transferring glycosyl groups | chr4:10082232-10087055 FORWARDvery weakly similar to (82.0)SSY3_SOLTU affx|C37_25948;	-1.26092
2.1.2.3	major CHO metabolism.synthesis.starch.starch branching	cit.14942.1.s1_at;	moderately similar to ( 375)AT3G20440| Symbols: EMB2729, BE1 | BE1/EMB2729 (BRANCHING ENZYME 1); alpha-amylase | chr3:7123609-7130370 REVERSEweakly similar to ( 168)GLGB_SOLTU affx|C37_19830;	-1.51288
2.1.2.3	major CHO metabolism.synthesis.starch.starch branching	cit.13267.1.s1_at;	weakly similar to ( 109)AT2G36390| Symbols: BE3, SBE2.1 | SBE2.1 (STARCH BRANCHING ENZYME 2.1); 1,4-alpha-glucan branching enzyme | chr2:15271362-15277019 FORWARDmoderately similar to ( 210)GLGB_ORYSA affx|C37_17578;	-1.32505
2.1.2.3	major CHO metabolism.synthesis.starch.starch branching	cit.29616.1.s1_s_at;	weakly similar to ( 106)AT5G03650| Symbols: SBE2.2 | SBE2.2 (STARCH BRANCHING ENZYME 2.2); 1,4-alpha-glucan branching enzyme | chr5:931923-937469 FORWARDvery weakly similar to (87.4)GLGB_MAIZE affx|C37_05015;	-1.31029
2.1.2.4	major CHO metabolism.synthesis.starch.debranching	cit.28256.1.s1_at;	moderately similar to ( 206)AT4G09020| Symbols: ATISA3, ISA3 | ATISA3/ISA3 (ISOAMYLASE 3); alpha-amylase | chr4:5784096-5788836 FORWARD affx|C37_38445;	-1.38985
2.1.2.4	major CHO metabolism.synthesis.starch.debranching	cit.5444.1.s1_at;	moderately similar to ( 258)AT4G09020| Symbols: ATISA3, ISA3 | ATISA3/ISA3 (ISOAMYLASE 3); alpha-amylase | chr4:5784096-5788836 FORWARD affx|C37_06910;	-1.44582
2.1.2.5	major CHO metabolism.synthesis.starch.transporter	cit.8713.1.s1_s_at;	moderately similar to ( 391)AT3G08580| Symbols: AAC1 | AAC1 (ADP/ATP CARRIER 1); binding | chr3:2605712-2607036 REVERSEmoderately similar to ( 398)ADT1_GOSHI affx|C37_11921;	1.58114
2.1.1.1	major CHO metabolism.synthesis.sucrose.SPS	cit.15009.1.s1_at;	highly similar to ( 534)AT4G10120| Symbols: ATSPS4F | ATSPS4F | chr4:6315029-6319781 FORWARDmoderately similar to ( 306)SPS_ORYSA affx|C37_19934;	1.96332
2.2.2	major CHO metabolism.degradation.starch	cit.25090.1.s1_at;	moderately similar to ( 219)AT3G10940| Symbols: | protein phosphatase-related | chr3:3422264-3423399 REVERSE affx|C37_27062;	-1.64552
2.2.2.1	major CHO metabolism.degradation.starch.starch cleavage	cit.1422.1.s1_at;	highly similar to ( 614)AT5G18670| Symbols: BAM9, BMY3 | BMY3 (BETA-AMYLASE 9); beta-amylase | chr5:6226140-6228001 FORWARDmoderately similar to ( 258)AMYB_VIGUN affx|C37_01794;	1.50823
2.2.2.1	major CHO metabolism.degradation.starch.starch cleavage	cit.15047.1.s1_at;	moderately similar to ( 342)AT2G32290| Symbols: BMY5, BAM6 | BAM6/BMY5 (BETA-AMYLASE 6); beta-amylase | chr2:13721720-13723983 REVERSEmoderately similar to ( 392)AMYB_MEDSA affx|C37_19995;	-1.40269
2.2.2.1	major CHO metabolism.degradation.starch.starch cleavage	cit.29250.1.s1_at;	weakly similar to ( 137)AT5G18670| Symbols: BAM9, BMY3 | BMY3 (BETA-AMYLASE 9); beta-amylase | chr5:6226140-6228001 FORWARD affx|C37_45730;	1.40309
2.2.2.1	major CHO metabolism.degradation.starch.starch cleavage	cit.23586.1.s1_at;	weakly similar to ( 131)AT3G23920| Symbols: BMY7, TR-BAMY, BAM1 | BAM1/BMY7/TR-BAMY (BETA-AMYLASE 1); beta-amylase | chr3:8641729-8644206 FORWARDvery weakly similar to (97.1)AMYB_MEDSA affx|C37_38737;	-1.37343
2.2.2.1	major CHO metabolism.degradation.starch.starch cleavage	cit.19590.1.s1_x_at;	weakly similar to ( 110)AT3G23920| Symbols: BMY7, TR-BAMY, BAM1 | BAM1/BMY7/TR-BAMY (BETA-AMYLASE 1); beta-amylase | chr3:8641729-8644206 FORWARD affx|C37_28392;	-1.45404
2.2.2.2	major CHO metabolism.degradation.starch.starch phosphorylase	cit.3633.1.s1_s_at;	highly similar to ( 610)AT3G29320| Symbols: | glucan phosphorylase, putative | chr3:11254108-11258824 FORWARDhighly similar to ( 609)PHSL_IPOBA affx|C37_04583;	-1.7907
2.2.2.3	major CHO metabolism.degradation.starch.glucan water dikinase	cit.14605.1.s1_at;	highly similar to ( 639)AT4G24450| Symbols: PWD, GWD3, ATGWD2 | ATGWD2/GWD3/PWD (PHOSPHOGLUCAN, WATER DIKINASE); ATP binding / kinase | chr4:12635771-12642641 FORWARDhighly similar to ( 566)GWD1_SOLTU affx|C37_19360;	1.2971
2.2.2.4	major CHO metabolism.degradation.starch.D enzyme	cit.29966.1.s1_at;	moderately similar to ( 345)AT2G04270| Symbols: | glycoside hydrolase starch-binding domain-containing protein | chr2:1475750-1480011 FORWARD affx|C37_08706;	-1.54855
2.2.2.4	major CHO metabolism.degradation.starch.D enzyme	cit.13067.1.s1_at;	weakly similar to ( 164)AT5G01260| Symbols: | glycoside hydrolase starch-binding domain-containing protein | chr5:105366-106487 FORWARD affx|C37_17313;	-1.69779
2.2.1.1	major CHO metabolism.degradation.sucrose.fructokinase	cit.1136.1.s1_s_at;	moderately similar to ( 444)AT3G59480| Symbols: | pfkB-type carbohydrate kinase family protein | chr3:21994080-21995417 FORWARDmoderately similar to ( 416)SCRK_SOLTU affx|C37_01438;	2.0513
2.2.1.1	major CHO metabolism.degradation.sucrose.fructokinase	cit.4485.1.s1_at;	moderately similar to ( 471)AT5G51830| Symbols: | pfkB-type carbohydrate kinase family protein | chr5:21086935-21088676 FORWARDmoderately similar to ( 384)SCRK2_MAIZE affx|C37_05686;	1.43383
2.2.1.3.1	major CHO metabolism.degradation.sucrose.invertases.neutral	cit.29849.1.s1_at;	moderately similar to ( 414)AT4G09510| Symbols: | beta-fructofuranosidase, putative / invertase, putative / saccharase, putative / beta-fructosidase, putative | chr4:6021676-6023307 REVERSE affx|C37_07873;	1.79981
2.2.1.3.1	major CHO metabolism.degradation.sucrose.invertases.neutral	cit.7163.1.s1_at;	moderately similar to ( 275)AT5G22510| Symbols: | beta-fructofuranosidase, putative / invertase, putative / saccharase, putative / beta-fructosidase, putative | chr5:7474977-7477482 REVERSE affx|C37_09632;	-1.36211
2.2.1.3.2	major CHO metabolism.degradation.sucrose.invertases.cell wall	cit.5734.1.s1_at;	weakly similar to ( 189)AT1G55120| Symbols: ATCWINV3, ATFRUCT5 | ATFRUCT5 (BETA-FRUCTOFURANOSIDASE 5) | chr1:20570650-20572832 FORWARDweakly similar to ( 172)INV1_PEA affx|C37_07327;	1.95911
2.2.1.4	major CHO metabolism.degradation.sucrose.hexokinase	cit.4337.1.s1_at;	highly similar to ( 759)AT4G29130| Symbols: GIN2, HXK1, ATHXK1 | ATHXK1 (GLUCOSE INSENSITIVE 2); ATP binding / hexokinase | chr4:14352344-14354871 REVERSEhighly similar to ( 758)HXK1_SPIOL affx|C37_05505;	1.4898
2.2.1.5	major CHO metabolism.degradation.sucrose.Susy	cit.25025.1.s1_s_at;	moderately similar to ( 295)AT1G73370| Symbols: SUS6 | SUS6; UDP-glycosyltransferase/ sucrose synthase | chr1:27588194-27591987 REVERSEmoderately similar to ( 236)SUS2_PEA affx|C37_24646;	4.12581
2.2.1.5	major CHO metabolism.degradation.sucrose.Susy	cit.16038.1.s1_at;	moderately similar to ( 413)AT1G73370| Symbols: SUS6 | SUS6; UDP-glycosyltransferase/ sucrose synthase | chr1:27588194-27591987 REVERSEmoderately similar to ( 335)SUS2_PEA affx|C37_21648;	3.90471
2.2.1.5	major CHO metabolism.degradation.sucrose.Susy	cit.219.1.s1_s_at;	moderately similar to ( 442)AT3G43190| Symbols: SUS4 | SUS4; UDP-glycosyltransferase/ sucrose synthase/ transferase, transferring glycosyl groups | chr3:15190192-15193565 REVERSEmoderately similar to ( 446)SUSY_SOYBN affx|C37_00280;	1.47648
4.2	glycolysis.PGM	cit.11440.1.s1_s_at;	moderately similar to ( 458)AT5G51820| Symbols: ATPGMP, PGM1, STF1, PGM | PGM (PHOSPHOGLUCOMUTASE) | chr5:21080757-21085159 REVERSEmoderately similar to ( 451)PGMP_SOLTU affx|C37_15294;	-1.68634
4.2	glycolysis.PGM	cit.10616.1.s1_s_at;	moderately similar to ( 281)AT1G23190| Symbols: | phosphoglucomutase, cytoplasmic, putative / glucose phosphomutase, putative | chr1:8219935-8224175 FORWARDmoderately similar to ( 284)PGMC_PEA affx|C37_14281;	1.17654
4.3	glycolysis.G6PIsomerase	cit.2602.1.s1_at;	moderately similar to ( 297)AT5G42740| Symbols: | glucose-6-phosphate isomerase, cytosolic (PGIC) | chr5:17153308-17157850 FORWARDmoderately similar to ( 310)G6PI_SPIOL affx|C37_03288;	1.29322
4.3	glycolysis.G6PIsomerase	cit.23990.1.s1_s_at;	moderately similar to ( 461)AT4G24620| Symbols: PGI, PGI1 | PGI1 (CHLOROPLASTIC PHOSPHOGLUCOSE ISOMERASE) | chr4:12709107-12712620 REVERSE affx|C37_40154;	1.39595
4.3	glycolysis.G6PIsomerase	cit.29499.1.s1_s_at;	moderately similar to ( 370)AT5G42740| Symbols: | glucose-6-phosphate isomerase, cytosolic (PGIC) | chr5:17153308-17157850 FORWARDmoderately similar to ( 369)G6PI_SPIOL affx|C37_03291;	1.98916
4.3	glycolysis.G6PIsomerase	cit.2604.1.s1_s_at;	moderately similar to ( 343)AT5G42740| Symbols: | glucose-6-phosphate isomerase, cytosolic (PGIC) | chr5:17153308-17157850 FORWARDmoderately similar to ( 352)G6PI_SPIOL affx|C37_03290;	1.52002
4.3	glycolysis.G6PIsomerase	cit.2603.1.s1_at;	highly similar to ( 650)AT5G42740| Symbols: | glucose-6-phosphate isomerase, cytosolic (PGIC) | chr5:17153308-17157850 FORWARDhighly similar to ( 652)G6PI_SPIOL affx|C37_03289;	1.7491
4.4	glycolysis.PPFK	cit.36687.1.s1_at;	weakly similar to ( 105)AT5G61580| Symbols: | phosphofructokinase family protein | chr5:24778376-24781053 FORWARD affx|C37_38592;	1.57041
4.7	glycolysis.aldolase	cit.456.1.s1_x_at;	moderately similar to ( 234)AT5G54770| Symbols: TZ, THI1 | THI1 (THIAZOLE REQUIRING) | chr5:22263860-22265117 FORWARDmoderately similar to ( 259)THI4_CITSI affx|C37_00561;	-1.34491
4.7	glycolysis.aldolase	cit.22526.1.s1_at;	very weakly similar to (82.8)AT2G36460| Symbols: | fructose-bisphosphate aldolase, putative | chr2:15304008-15304811 REVERSE affx|C37_32107;	1.56436
4.7	glycolysis.aldolase	cit.22929.1.s1_at;	weakly similar to ( 146)AT2G36460| Symbols: | fructose-bisphosphate aldolase, putative | chr2:15304008-15304811 REVERSEweakly similar to ( 137)ALF_ORYSA affx|C37_34036;	1.29968
4.7	glycolysis.aldolase	cit.12748.1.s1_s_at;	highly similar to ( 582)AT4G26530| Symbols: | fructose-bisphosphate aldolase, putative | chr4:13391573-13392944 FORWARDhighly similar to ( 586)ALF1_PEA affx|C37_16941;	-3.02994
4.8	glycolysis.TPI	cit.10256.1.s1_s_at;	moderately similar to ( 456)AT2G21170| Symbols: TIM | TIM (TRIOSEPHOSPHATE ISOMERASE) | chr2:9078128-9080187 REVERSEmoderately similar to ( 448)TPIC_SPIOL affx|C37_13818;	-1.32983
4.9	glycolysis.glyceraldehyde 3-phosphate dehydrogenase	cit.8105.1.s1_s_at;	highly similar to ( 588)AT3G04120| Symbols: GAPC-1, GAPC | GAPC (GLYCERALDEHYDE-3-PHOSPHATE DEHYDROGENASE C SUBUNIT); glyceraldehyde-3-phosphate dehydrogenase | chr3:1081084-1083138 FORWARDhighly similar to ( 582)G3PC_SINAL affx|C37_11112;	1.87517
4.9	glycolysis.glyceraldehyde 3-phosphate dehydrogenase	cit.9259.1.s1_s_at;	moderately similar to ( 380)AT1G42970| Symbols: GAPB | GAPB (GLYCERALDEHYDE-3-PHOSPHATE DEHYDROGENASE B SUBUNIT); glyceraldehyde-3-phosphate dehydrogenase | chr1:16129992-16132024 FORWARDmoderately similar to ( 386)G3PB_PEA affx|C37_12596;	-1.41952
4.11	glycolysis.phosphoglycerate mutase	cit.15564.1.s1_at;	moderately similar to ( 277)AT1G22170| Symbols: | phosphoglycerate/bisphosphoglycerate mutase family protein | chr1:7826592-7828044 FORWARD affx|C37_20825;	-1.45
4.11	glycolysis.phosphoglycerate mutase	cit.22452.1.s1_s_at;	moderately similar to ( 216)AT1G09780| Symbols: | 2,3-biphosphoglycerate-independent phosphoglycerate mutase, putative / phosphoglyceromutase, putative | chr1:3165552-3167814 REVERSEmoderately similar to ( 220)PMGI_MESCR affx|C37_31730;	1.43808
4.11	glycolysis.phosphoglycerate mutase	cit.5173.1.s1_at;	moderately similar to ( 298)AT3G50520| Symbols: | phosphoglycerate/bisphosphoglycerate mutase family protein | chr3:18759039-18760399 FORWARD affx|C37_06552;	1.2971
4.11	glycolysis.phosphoglycerate mutase	cit.9764.1.s1_at;	very weakly similar to (82.0)AT1G09780| Symbols: | 2,3-biphosphoglycerate-independent phosphoglycerate mutase, putative / phosphoglyceromutase, putative | chr1:3165552-3167814 REVERSEvery weakly similar to (89.4)PMGI_TOBAC affx|C37_13224;	1.85976
4.12	glycolysis.enolase	cit.8552.1.s1_s_at;	highly similar to ( 785)AT2G36530| Symbols: LOS2 | LOS2 (Low expression of osmotically responsive genes 1); phosphopyruvate hydratase | chr2:15328160-15330865 REVERSEhighly similar to ( 835)ENO_RICCO affx|C37_11712;	1.28519
4.13	glycolysis.PK	cit.8517.1.s1_s_at;	highly similar to ( 679)AT3G52990| Symbols: | pyruvate kinase, putative | chr3:19660314-19663215 FORWARDmoderately similar to ( 210)KPYC_SOYBN affx|C37_11665;	1.34796
4.13	glycolysis.PK	cit.23722.1.s1_s_at;	moderately similar to ( 320)AT5G56350| Symbols: | pyruvate kinase, putative | chr5:22837480-22839755 REVERSEmoderately similar to ( 317)KPYC_TOBAC affx|C37_39077;	1.22446
7.1.1	OPP.oxidative PP.G6PD	cit.13931.1.s1_s_at;	moderately similar to ( 317)AT5G35790| Symbols: G6PD1 | G6PD1 (GLUCOSE-6-PHOSPHATE DEHYDROGENASE 1); glucose-6-phosphate dehydrogenase | chr5:13974109-13976916 REVERSEmoderately similar to ( 334)G6PDC_SOLTU affx|C37_18445;	-1.4232
7.1.3	OPP.oxidative PP.6-phosphogluconate dehydrogenase	cit.24716.1.s1_s_at;	moderately similar to ( 257)AT3G02360| Symbols: | 6-phosphogluconate dehydrogenase family protein | chr3:482505-483965 FORWARD affx|C37_42281;	1.2948
7.1.3	OPP.oxidative PP.6-phosphogluconate dehydrogenase	cit.2921.1.s1_s_at;	highly similar to ( 867)AT1G64190| Symbols: | 6-phosphogluconate dehydrogenase family protein | chr1:23829212-23830675 REVERSE affx|C37_03693;	1.23361
7.1.3	OPP.oxidative PP.6-phosphogluconate dehydrogenase	cit.1829.1.s1_at;	highly similar to ( 839)AT3G02360| Symbols: | 6-phosphogluconate dehydrogenase family protein | chr3:482505-483965 FORWARD affx|C37_02313;	1.28089
7.1.3	OPP.oxidative PP.6-phosphogluconate dehydrogenase	cit.13302.1.s1_s_at;	highly similar to ( 508)AT4G20930| Symbols: | 3-hydroxyisobutyrate dehydrogenase, putative | chr4:11198638-11201047 REVERSE affx|C37_17624;	-1.29261
7.1.3	OPP.oxidative PP.6-phosphogluconate dehydrogenase	cit.2921.1.s1_at;	highly similar to ( 867)AT1G64190| Symbols: | 6-phosphogluconate dehydrogenase family protein | chr1:23829212-23830675 REVERSE affx|C37_03693;	1.33812
7.3	OPP.electron transfer	cit.19271.1.s1_at;	weakly similar to ( 155)AT4G14890| Symbols: | ferredoxin family protein | chr4:8520882-8521346 FORWARDvery weakly similar to (84.0)FER2_RAPSA affx|C37_26685;	-2.08934
7.2.3	OPP.non-reductive PP.ribulose-phosphate 3-epimerase	cit.29848.1.s1_at;	moderately similar to ( 265)AT1G63290| Symbols: | ribulose-phosphate 3-epimerase, cytosolic, putative / pentose-5-phosphate 3-epimerase, putative | chr1:23475760-23477255 REVERSEmoderately similar to ( 270)RPE1_ORYSA affx|C37_07868;	1.33778
7.2.4	OPP.non-reductive PP.ribose 5-phosphate isomerase	cit.16145.1.s1_at;	moderately similar to ( 271)AT5G44520| Symbols: | ribose 5-phosphate isomerase-related | chr5:17951837-17953668 REVERSE affx|C37_21850;	-1.33513
7.2.4	OPP.non-reductive PP.ribose 5-phosphate isomerase	cit.11661.1.s1_at;	moderately similar to ( 366)AT2G01290| Symbols: | ribose-5-phosphate isomerase | chr2:149191-149988 REVERSE affx|C37_15559;	1.50888
5.2	fermentation.PDC	cit.9612.1.s1_x_at;	highly similar to ( 615)AT4G33070| Symbols: | pyruvate decarboxylase, putative | chr4:15952522-15954679 REVERSEhighly similar to ( 649)PDC2_PEA affx|C37_13038;	1.78525
5.2	fermentation.PDC	cit.12778.1.s1_s_at;	moderately similar to ( 375)AT5G54960| Symbols: PDC2 | PDC2 (PYRUVATE DECARBOXYLASE-2); pyruvate decarboxylase | chr5:22328084-22329907 REVERSEmoderately similar to ( 412)PDC1_PEA affx|C37_16981;	1.70888
5.2	fermentation.PDC	cit.30531.1.s1_s_at;	moderately similar to ( 313)AT4G33070| Symbols: | pyruvate decarboxylase, putative | chr4:15952522-15954679 REVERSEmoderately similar to ( 273)PDC1_ORYSA affx|C37_13039;	2.72129
5.3	fermentation.ADH	cit.7462.1.s1_at;	weakly similar to ( 169)AT4G22110| Symbols: | alcohol dehydrogenase, putative | chr4:11711434-11713958 REVERSEweakly similar to ( 141)ADHX_ORYSA affx|C37_10122;	-1.84559
5.3	fermentation.ADH	cit.30654.1.s1_s_at;	moderately similar to ( 291)AT1G77120| Symbols: ADH, ATADH, ADH1 | ADH1 (ALCOHOL DEHYDROGENASE 1) | chr1:28980403-28982110 FORWARDmoderately similar to ( 291)ADH_MALDO affx|C37_15782;	-1.76792
5.3	fermentation.ADH	cit.14550.1.s1_s_at;	moderately similar to ( 286)AT5G42250| Symbols: | alcohol dehydrogenase, putative | chr5:16911315-16914678 FORWARDweakly similar to ( 191)ADHX_ORYSA affx|C37_19287;	-1.54662
5.3	fermentation.ADH	cit.11192.1.s1_s_at;	moderately similar to ( 277)AT5G42250| Symbols: | alcohol dehydrogenase, putative | chr5:16911315-16914678 FORWARDmoderately similar to ( 261)ADHX_ORYSA affx|C37_14983;	-1.78163
5.3	fermentation.ADH	cit.3120.1.s1_s_at;	highly similar to ( 606)AT1G77120| Symbols: ADH, ATADH, ADH1 | ADH1 (ALCOHOL DEHYDROGENASE 1) | chr1:28980403-28982110 FORWARDhighly similar to ( 656)ADH_MALDO affx|C37_03945;	3.82013
5.3	fermentation.ADH	cit.6459.1.s1_at;	weakly similar to ( 154)AT1G77120| Symbols: ADH, ATADH, ADH1 | ADH1 (ALCOHOL DEHYDROGENASE 1) | chr1:28980403-28982110 FORWARDweakly similar to ( 163)ADH1_SOLTU affx|C37_08418;	1.86623
5.3	fermentation.ADH	cit.9488.1.s1_at;	highly similar to ( 661)AT1G77120| Symbols: ADH, ATADH, ADH1 | ADH1 (ALCOHOL DEHYDROGENASE 1) | chr1:28980403-28982110 FORWARDhighly similar to ( 667)ADH1_PETHY affx|C37_12878;	1.70172
5.3	fermentation.ADH	cit.21302.1.s1_s_at;	weakly similar to ( 114)AT1G77120| Symbols: ADH, ATADH, ADH1 | ADH1 (ALCOHOL DEHYDROGENASE 1) | chr1:28980403-28982110 FORWARDweakly similar to ( 123)ADH_MALDO affx|C37_46553;	-1.99121
5.1	fermentation.aldehyde dehydrogenase	cit.20630.1.s1_at;	very weakly similar to (80.1)AT3G48000| Symbols: ALDH2, ALDH2B4 | ALDH2B4 (ALDEHYDE DEHYDROGENASE 2); 3-chloroallyl aldehyde dehydrogenase/ aldehyde dehydrogenase (NAD) | chr3:17728067-17730828 REVERSE affx|C37_44901;	1.64415
5.1	fermentation.aldehyde dehydrogenase	cit.30486.1.s1_s_at;	moderately similar to ( 231)AT3G48000| Symbols: ALDH2, ALDH2B4 | ALDH2B4 (ALDEHYDE DEHYDROGENASE 2); 3-chloroallyl aldehyde dehydrogenase/ aldehyde dehydrogenase (NAD) | chr3:17728067-17730828 REVERSEweakly similar to ( 115)BADH_BETVU affx|C37_12076;	-1.33443
6.3	gluconeogenesis.Malate DH	cit.3019.1.s1_s_at;	highly similar to ( 532)AT2G22780| Symbols: PMDH1 | PMDH1 (PEROXISOMAL NAD-MALATE DEHYDROGENASE 1); malate dehydrogenase | chr2:9697075-9699003 REVERSEhighly similar to ( 544)MDHG_CUCSA affx|C37_03810;	-1.67572
6.3	gluconeogenesis.Malate DH	cit.5165.1.s1_at;	highly similar to ( 521)AT1G53240| Symbols: | malate dehydrogenase (NAD), mitochondrial | chr1:19858634-19860470 REVERSEhighly similar to ( 523)MDHM_FRAAN affx|C37_06542;	-2.37621
6.3	gluconeogenesis.Malate DH	cit.22722.1.s1_s_at;	weakly similar to ( 197)AT3G15020| Symbols: | malate dehydrogenase (NAD), mitochondrial, putative | chr3:5056146-5057872 FORWARDweakly similar to ( 198)MDHM_FRAAN affx|C37_33086;	1.52239
6.3	gluconeogenesis.Malate DH	cit.9400.1.s1_s_at;	highly similar to ( 530)AT3G15020| Symbols: | malate dehydrogenase (NAD), mitochondrial, putative | chr3:5056146-5057872 FORWARDhighly similar to ( 528)MDHM_FRAAN affx|C37_12768;	1.60146
6.3	gluconeogenesis.Malate DH	cit.3018.1.s1_at;	highly similar to ( 519)AT5G09660| Symbols: PMDH2 | PMDH2 (PEROXISOMAL NAD-MALATE DEHYDROGENASE 2) | chr5:2993692-2995552 REVERSEhighly similar to ( 545)MDHG_CUCSA affx|C37_03809;	-1.63272
6.3	gluconeogenesis.Malate DH	cit.9399.1.s1_at;	highly similar to ( 532)AT3G15020| Symbols: | malate dehydrogenase (NAD), mitochondrial, putative | chr3:5056146-5057872 FORWARDhighly similar to ( 527)MDHM_FRAAN affx|C37_12767;	1.34405
6.4	gluconeogenese/ glyoxylate cycle.PEPCK	cit.19543.1.s1_s_at;	very weakly similar to (88.2)AT4G37870| Symbols: PCK1, PEPCK | PCK1/PEPCK (PHOSPHOENOLPYRUVATE CARBOXYKINASE 1); ATP binding / phosphoenolpyruvate carboxykinase (ATP) | chr4:17802968-17806326 REVERSEvery weakly similar to (95.1)PEPCK_CUCSA affx|C37_28291;	1.95219
6.4	gluconeogenese/ glyoxylate cycle.PEPCK	cit.30085.1.s1_s_at;	moderately similar to ( 208)AT4G37870| Symbols: PCK1, PEPCK | PCK1/PEPCK (PHOSPHOENOLPYRUVATE CARBOXYKINASE 1); ATP binding / phosphoenolpyruvate carboxykinase (ATP) | chr4:17802968-17806326 REVERSEmoderately similar to ( 205)PEPCK_CUCSA affx|C37_09301;	2.88732
6.4	gluconeogenese/ glyoxylate cycle.PEPCK	cit.1134.1.s1_s_at;	highly similar to ( 546)AT4G37870| Symbols: PCK1, PEPCK | PCK1/PEPCK (PHOSPHOENOLPYRUVATE CARBOXYKINASE 1); ATP binding / phosphoenolpyruvate carboxykinase (ATP) | chr4:17802968-17806326 REVERSEhighly similar to ( 532)PEPCK_MAIZE affx|C37_01436;	2.04128
6.4	gluconeogenese/ glyoxylate cycle.PEPCK	cit.19543.1.s1_at;	very weakly similar to (88.2)AT4G37870| Symbols: PCK1, PEPCK | PCK1/PEPCK (PHOSPHOENOLPYRUVATE CARBOXYKINASE 1); ATP binding / phosphoenolpyruvate carboxykinase (ATP) | chr4:17802968-17806326 REVERSEvery weakly similar to (95.1)PEPCK_CUCSA affx|C37_28291;	1.83411
6.5	gluconeogenese/ glyoxylate cycle.pyruvate dikinase	cit.7188.1.s1_at;	moderately similar to ( 427)AT4G15530| Symbols: PPDK | PPDK (PYRUVATE ORTHOPHOSPHATE DIKINASE) | chr4:8864826-8870746 REVERSEmoderately similar to ( 459)PPDK_MESCR affx|C37_09675;	-1.89062
6.5	gluconeogenese/ glyoxylate cycle.pyruvate dikinase	cit.18718.1.s1_s_at;	weakly similar to ( 155)AT4G15530| Symbols: PPDK | PPDK (PYRUVATE ORTHOPHOSPHATE DIKINASE) | chr4:8864826-8870746 REVERSEweakly similar to ( 160)PPDK_MESCR affx|C37_25263;	-1.81192
8.1.1.2	TCA / org. transformation.TCA.pyruvate DH.E2	cit.3115.1.s1_at;	moderately similar to ( 335)AT3G13930| Symbols: | dihydrolipoamide S-acetyltransferase, putative | chr3:4596247-4600150 FORWARD affx|C37_03938;	1.18758
8.1.1.3	TCA / org. transformation.TCA.pyruvate DH.E3	cit.37045.1.s1_s_at;	moderately similar to ( 202)AT3G17240| Symbols: LPD2 | LPD2 (LIPOAMIDE DEHYDROGENASE 2); FAD binding / dihydrolipoyl dehydrogenase/ oxidoreductase | chr3:5890284-5892172 REVERSEmoderately similar to ( 204)DLDH_PEA affx|C37_42052;	1.33023
8.1.1.3	TCA / org. transformation.TCA.pyruvate DH.E3	cit.9870.1.s1_s_at;	highly similar to ( 836)AT1G48030| Symbols: MTLPD1 | dihydrolipoamide dehydrogenase 1, mitochondrial / lipoamide dehydrogenase 1 (MTLPD1) | chr1:17721101-17722810 REVERSEhighly similar to ( 824)DLDH_PEA affx|C37_13346;	1.25
8.1.3	TCA / org. transformation.TCA.aconitase	cit.1939.1.s1_s_at;	moderately similar to ( 378)AT2G05710| Symbols: | aconitate hydratase, cytoplasmic, putative / citrate hydro-lyase/aconitase, putative | chr2:2141588-2146347 FORWARDmoderately similar to ( 388)ACOC_CUCMA affx|C37_02444;	1.20918
8.1.4	TCA / org. transformation.TCA.IDH	cit.11359.1.s1_s_at;	highly similar to ( 610)AT4G35260| Symbols: IDH1 | IDH1 (ISOCITRATE DEHYDROGENASE 1); isocitrate dehydrogenase (NAD+) | chr4:16774499-16776238 REVERSEmoderately similar to ( 283)LEU3_SOLTU affx|C37_15192;	1.31686
8.1.4	TCA / org. transformation.TCA.IDH	cit.11359.1.s1_at;	highly similar to ( 610)AT4G35260| Symbols: IDH1 | IDH1 (ISOCITRATE DEHYDROGENASE 1); isocitrate dehydrogenase (NAD+) | chr4:16774499-16776238 REVERSEmoderately similar to ( 283)LEU3_SOLTU affx|C37_15192;	1.26111
8.1.4	TCA / org. transformation.TCA.IDH	cit.6331.1.s1_at;	highly similar to ( 590)AT4G35260| Symbols: IDH1 | IDH1 (ISOCITRATE DEHYDROGENASE 1); isocitrate dehydrogenase (NAD+) | chr4:16774499-16776238 REVERSEmoderately similar to ( 274)LEU3_SOLTU affx|C37_08213;	1.23448
8.1.6	TCA / org. transformation.TCA.succinyl-CoA ligase	cit.24653.1.s1_s_at;	moderately similar to ( 252)AT2G20420| Symbols: | succinyl-CoA ligase (GDP-forming) beta-chain, mitochondrial, putative / succinyl-CoA synthetase, beta chain, putative / SCS-beta, putative | chr2:8812655-8814939 FORWARDmoderately similar to ( 258)SUCB_ORYSA affx|C37_42115;	1.30547
8.1.6	TCA / org. transformation.TCA.succinyl-CoA ligase	cit.11006.1.s1_s_at;	highly similar to ( 506)AT5G08300| Symbols: | succinyl-CoA ligase (GDP-forming) alpha-chain, mitochondrial, putative / succinyl-CoA synthetase, alpha chain, putative / SCS-alpha, putative | chr5:2667580-2669673 FORWARDhighly similar to ( 514)SUCA_ORYSA affx|C37_14749;	1.52822
8.1.6	TCA / org. transformation.TCA.succinyl-CoA ligase	cit.23844.1.s1_at;	moderately similar to ( 290)AT5G23250| Symbols: | succinyl-CoA ligase (GDP-forming) alpha-chain, mitochondrial, putative / succinyl-CoA synthetase, alpha chain, putative / SCS-alpha, putative | chr5:7830463-7832268 FORWARDmoderately similar to ( 288)SUCA_ORYSA affx|C37_39429;	1.40675
8.1.8	TCA / org. transformation.TCA.fumarase	cit.12547.1.s1_at;	highly similar to ( 870)AT2G47510| Symbols: FUM1 | FUM1 (FUMARASE 1) | chr2:19505684-19509090 FORWARD affx|C37_16678;	1.28847
8.2.9	TCA / org. transformation.other organic acid transformaitons.cyt MDH	cit.11832.1.s1_s_at;	highly similar to ( 690)AT5G58330| Symbols: | malate dehydrogenase (NADP), chloroplast, putative | chr5:23597236-23599513 REVERSEhighly similar to ( 707)MDHP_MEDSA affx|C37_15764;	-1.3924
8.2.9	TCA / org. transformation.other organic acid transformaitons.cyt MDH	cit.26549.1.s1_at;	weakly similar to ( 178)AT5G43330| Symbols: | malate dehydrogenase, cytosolic, putative | chr5:17407780-17409677 FORWARDweakly similar to ( 185)MDHC_MAIZE affx|C37_33722;	1.37644
8.2.9	TCA / org. transformation.other organic acid transformaitons.cyt MDH	cit.8670.1.s1_x_at;	highly similar to ( 577)AT5G43330| Symbols: | malate dehydrogenase, cytosolic, putative | chr5:17407780-17409677 FORWARDhighly similar to ( 579)MDHC_MEDSA affx|C37_11868;	1.24667
8.2.10	TCA / org. transformation.other organic acid transformaitons.malic	cit.5311.1.s1_at;	moderately similar to ( 401)AT4G00570| Symbols: | malate oxidoreductase, putative | chr4:242817-246522 REVERSEmoderately similar to ( 367)MAON_SOLTU affx|C37_06725;	1.25206
8.2.10	TCA / org. transformation.other organic acid transformaitons.malic	cit.1108.1.s1_s_at;	highly similar to ( 904)AT5G25880| Symbols: ATNADP-ME3 | ATNADP-ME3 (NADP-MALIC ENZYME 3); malate dehydrogenase (oxaloacetate-decarboxylating) (NADP+)/ malic enzyme/ oxidoreductase, acting on NADH or NADPH, NAD or NADP as acceptor | chr5:9024552-9028263 FORWARDhighly similar to ( 942)MAOX_PHAVU affx|C37_01405;	1.64802
8.2.11	TCA / org. transformation.other organic acid transformaitons.atp-citrate lyase	cit.4587.1.s1_s_at;	moderately similar to ( 253)AT1G09430| Symbols: ACLA-3 | ACLA-3 (ATP-citrate lyase A-3) | chr1:3042137-3044980 FORWARD affx|C37_05813;	1.41434
8.2.11	TCA / org. transformation.other organic acid transformaitons.atp-citrate lyase	cit.11635.1.s1_s_at;	highly similar to ( 541)AT5G49460| Symbols: ACLB-2 | ACLB-2 (ATP-citrate lyase B-2) | chr5:20072274-20075421 FORWARD affx|C37_15529;	1.53125
8.2.11	TCA / org. transformation.other organic acid transformaitons.atp-citrate lyase	cit.11635.1.s1_at;	highly similar to ( 541)AT5G49460| Symbols: ACLB-2 | ACLB-2 (ATP-citrate lyase B-2) | chr5:20072274-20075421 FORWARD affx|C37_15529;	1.4861
8.2.11	TCA / org. transformation.other organic acid transformaitons.atp-citrate lyase	cit.30906.1.s1_s_at;	moderately similar to ( 373)AT5G49460| Symbols: ACLB-2 | ACLB-2 (ATP-citrate lyase B-2) | chr5:20072274-20075421 FORWARD affx|C37_19106;	2.00451
8.2.11	TCA / org. transformation.other organic acid transformaitons.atp-citrate lyase	cit.14414.1.s1_at;	highly similar to ( 501)AT5G49460| Symbols: ACLB-2 | ACLB-2 (ATP-citrate lyase B-2) | chr5:20072274-20075421 FORWARDvery weakly similar to (87.8)SUCA_ORYSA affx|C37_19105;	1.73179
8.3	TCA / org. transformation.carbonic anhydrases	cit.38752.1.s1_at;	weakly similar to ( 124)AT3G52720| Symbols: | carbonic anhydrase family protein | chr3:19550595-19552094 REVERSE affx|C37_44715;	8.31699
8.3	TCA / org. transformation.carbonic anhydrases	cit.1122.1.s1_at;	weakly similar to ( 130)AT5G26667| Symbols: | uridylate kinase / uridine monophosphate kinase / UMP kinase (PYR6) | chr5:9276662-9278094 FORWARDvery weakly similar to (89.4)CAHX_FLAPR affx|C37_01422;	-1.69156
21.2	redox.ascorbate and glutathione	cit.20003.1.s1_s_at;	weakly similar to ( 177)AT4G25570| Symbols: ACYB-2 | ACYB-2 (Arabidopsis cytochrome b561 -2); carbon-monoxide oxygenase | chr4:13053896-13055527 REVERSE affx|C37_29196;	-1.3335
21.2	redox.ascorbate and glutathione	cit.18521.1.s1_at;	weakly similar to ( 148)AT3G19000| Symbols: | oxidoreductase, 2OG-Fe(II) oxygenase family protein | chr3:6554010-6554993 REVERSE affx|C37_24441;	-2.26386
21.2	redox.ascorbate and glutathione	cit.585.1.s1_s_at;	weakly similar to ( 181)AT2G32720| Symbols: B5 #4 | B5 #4 (cytochrome b5 family protein #4); heme binding / transition metal ion binding | chr2:13884090-13885524 REVERSEweakly similar to ( 169)CYB5_ORYSA affx|C37_00706;	2.51315
21.2	redox.ascorbate and glutathione	cit.2088.1.s1_s_at;	moderately similar to ( 254)AT4G25570| Symbols: ACYB-2 | ACYB-2 (Arabidopsis cytochrome b561 -2); carbon-monoxide oxygenase | chr4:13053896-13055527 REVERSE affx|C37_02634;	-1.32705
21.2	redox.ascorbate and glutathione	cit.1149.1.s1_at;	moderately similar to ( 201)AT2G32720| Symbols: B5 #4 | B5 #4 (cytochrome b5 family protein #4); heme binding / transition metal ion binding | chr2:13884090-13885524 REVERSEmoderately similar to ( 221)CYB5_TOBAC affx|C37_01453;	1.75281
21.2.1	redox.ascorbate and glutathione.ascorbate	cit.13490.1.s1_x_at;	moderately similar to ( 372)AT5G16710| Symbols: DHAR3 | DHAR3 (DEHYDROASCORBATE REDUCTASE 1); glutathione dehydrogenase (ascorbate) | chr5:5483315-5484929 FORWARD affx|C37_17855;	-1.3664
21.2.1	redox.ascorbate and glutathione.ascorbate	cit.31710.1.s1_s_at;	weakly similar to ( 128)AT1G19570| Symbols: DHAR1 | DHAR1 (DEHYDROASCORBATE REDUCTASE) | chr1:6773453-6774404 REVERSE affx|C37_23212;	-1.29147
21.2.1	redox.ascorbate and glutathione.ascorbate	cit.18421.1.s1_at;	very weakly similar to (89.0)AT3G27820| Symbols: ATMDAR4, MDAR4 | ATMDAR4/MDAR4 (MONODEHYDROASCORBATE REDUCTASE 4); monodehydroascorbate reductase (NADH) | chr3:10316486-10319118 FORWARD affx|C37_23601;	-1.34753
21.2.1	redox.ascorbate and glutathione.ascorbate	cit.10846.1.s1_s_at;	highly similar to ( 520)AT1G77490| Symbols: TAPX | TAPX; L-ascorbate peroxidase | chr1:29122582-29124940 FORWARDhighly similar to ( 508)APX8_ORYSA affx|C37_14553;	-1.48517
21.2.1	redox.ascorbate and glutathione.ascorbate	cit.18421.1.s1_s_at;	very weakly similar to (89.0)AT3G27820| Symbols: ATMDAR4, MDAR4 | ATMDAR4/MDAR4 (MONODEHYDROASCORBATE REDUCTASE 4); monodehydroascorbate reductase (NADH) | chr3:10316486-10319118 FORWARD affx|C37_23601;	-1.32871
21.2.1	redox.ascorbate and glutathione.ascorbate	cit.5497.1.s1_at;	moderately similar to ( 397)AT4G35000| Symbols: APX3 | APX3 (ASCORBATE PEROXIDASE 3); L-ascorbate peroxidase | chr4:16665012-16667546 REVERSEmoderately similar to ( 373)APX4_ORYSA affx|C37_06995;	2.13803
21.2.1	redox.ascorbate and glutathione.ascorbate	cit.23835.1.s1_s_at;	weakly similar to ( 198)AT5G16710| Symbols: DHAR3 | DHAR3 (DEHYDROASCORBATE REDUCTASE 1); glutathione dehydrogenase (ascorbate) | chr5:5483315-5484929 FORWARD affx|C37_39397;	-1.28377
21.2.1.2	redox.ascorbate and glutathione.ascorbate.GDP-L-galactose-hexose-1-phosphate guanyltransferase	cit.8866.1.s1_s_at;	moderately similar to ( 216)AT5G55120| Symbols: VTC5 | VTC5; galactose-1-phosphate guanylyltransferase (GDP) | chr5:22386741-22388935 FORWARD affx|C37_12120;	-1.32563
21.2.1.2	redox.ascorbate and glutathione.ascorbate.GDP-L-galactose-hexose-1-phosphate guanyltransferase	cit.8866.1.s1_x_at;	moderately similar to ( 216)AT5G55120| Symbols: VTC5 | VTC5; galactose-1-phosphate guanylyltransferase (GDP) | chr5:22386741-22388935 FORWARD affx|C37_12120;	-1.31751
21.2.2	redox.ascorbate and glutathione.glutathione	cit.6464.1.s1_at;	very weakly similar to (84.7)AT4G23100| Symbols: GSH1, CAD2, PAD2, RML1 | RML1 (ROOT MERISTEMLESS 1) | chr4:12103790-12106762 REVERSEvery weakly similar to (86.7)GSH1_MEDTR affx|C37_08427;	1.57116
21.2.2	redox.ascorbate and glutathione.glutathione	cit.10524.1.s1_s_at;	moderately similar to ( 311)AT3G54660| Symbols: EMB2360, ATGR2 | GR (GLUTATHIONE REDUCTASE); glutathione-disulfide reductase | chr3:20241334-20244078 REVERSEmoderately similar to ( 317)GSHRP_SOYBN affx|C37_14167;	-1.28907
21.2.2	redox.ascorbate and glutathione.glutathione	cit.29419.1.s1_s_at;	moderately similar to ( 321)AT4G31870| Symbols: ATGPX7 | ATGPX7 (GLUTATHIONE PEROXIDASE 7); glutathione peroxidase | chr4:15410211-15411623 FORWARDmoderately similar to ( 314)GPX1_PEA affx|C37_01931;	-1.57118
21.2.2	redox.ascorbate and glutathione.glutathione	cit.1527.1.s1_at;	moderately similar to ( 323)AT4G31870| Symbols: ATGPX7 | ATGPX7 (GLUTATHIONE PEROXIDASE 7); glutathione peroxidase | chr4:15410211-15411623 FORWARDmoderately similar to ( 330)GPX1_PEA affx|C37_01932;	-1.54264
1.3.2	PS.calvin cyle.rubisco small subunit	cit.1818.1.s1_at;	weakly similar to ( 191)AT5G38410| Symbols: | ribulose bisphosphate carboxylase small chain 3B / RuBisCO small subunit 3B (RBCS-3B) (ATS3B) | chr5:15394731-15395536 REVERSEweakly similar to ( 195)RBS_PINTH affx|C37_02299;	-1.71449
1.3.2	PS.calvin cyle.rubisco small subunit	cit.8578.1.s1_at;	weakly similar to ( 135)AT1G67090| Symbols: RBCS1A | RBCS1A; ribulose-bisphosphate carboxylase | chr1:25052253-25052912 REVERSEweakly similar to ( 145)RBS_LACSA affx|C37_11744;	-3.69423
1.3.2	PS.calvin cyle.rubisco small subunit	cit.1816.1.s1_s_at;	weakly similar to ( 190)AT5G38410| Symbols: | ribulose bisphosphate carboxylase small chain 3B / RuBisCO small subunit 3B (RBCS-3B) (ATS3B) | chr5:15394731-15395536 REVERSEweakly similar to ( 195)RBS_MAIZE affx|C37_02297;	-1.87578
1.3.3	PS.calvin cyle.phosphoglycerate kinase	cit.28750.1.s1_s_at;	moderately similar to ( 224)AT1G56190| Symbols: | phosphoglycerate kinase, putative | chr1:21032287-21034119 FORWARDmoderately similar to ( 229)PGKH_TOBAC affx|C37_40620;	-1.49232
1.3.3	PS.calvin cyle.phosphoglycerate kinase	cit.1478.1.s1_s_at;	highly similar to ( 736)AT1G56190| Symbols: | phosphoglycerate kinase, putative | chr1:21032287-21034119 FORWARDhighly similar to ( 734)PGKH_TOBAC affx|C37_01868;	-1.41676
1.3.3	PS.calvin cyle.phosphoglycerate kinase	cit.1478.1.s1_at;	highly similar to ( 736)AT1G56190| Symbols: | phosphoglycerate kinase, putative | chr1:21032287-21034119 FORWARDhighly similar to ( 734)PGKH_TOBAC affx|C37_01868;	-1.5641
1.3.4	PS.calvin cyle.GAP	cit.9259.1.s1_s_at;	moderately similar to ( 380)AT1G42970| Symbols: GAPB | GAPB (GLYCERALDEHYDE-3-PHOSPHATE DEHYDROGENASE B SUBUNIT); glyceraldehyde-3-phosphate dehydrogenase | chr1:16129992-16132024 FORWARDmoderately similar to ( 386)G3PB_PEA affx|C37_12596;	-1.41952
1.3.4	PS.calvin cyle.GAP	cit.9743.1.s1_s_at;	highly similar to ( 563)AT3G26650| Symbols: GAPA-1, GAPA | GAPA (GLYCERALDEHYDE 3-PHOSPHATE DEHYDROGENASE A SUBUNIT); glyceraldehyde-3-phosphate dehydrogenase | chr3:9796463-9798085 FORWARDhighly similar to ( 578)G3PA_PEA affx|C37_13202;	-1.81836
1.3.4	PS.calvin cyle.GAP	cit.10921.1.s1_s_at;	highly similar to ( 896)AT2G24270| Symbols: ALDH11A3 | ALDH11A3 (Aldehyde dehydrogenase 11A3); 3-chloroallyl aldehyde dehydrogenase/ glyceraldehyde-3-phosphate dehydrogenase (NADP+) | chr2:10334405-10336681 REVERSEhighly similar to ( 910)GAPN_NICPL affx|C37_14645;	-1.81348
1.3.4	PS.calvin cyle.GAP	cit.28388.1.s1_s_at;	moderately similar to ( 311)AT2G24270| Symbols: ALDH11A3 | ALDH11A3 (Aldehyde dehydrogenase 11A3); 3-chloroallyl aldehyde dehydrogenase/ glyceraldehyde-3-phosphate dehydrogenase (NADP+) | chr2:10334405-10336681 REVERSEmoderately similar to ( 324)GAPN_NICPL affx|C37_39170;	-1.39794
1.3.6	PS.calvin cyle.aldolase	cit.8874.1.s1_at;	highly similar to ( 677)AT4G38970| Symbols: | fructose-bisphosphate aldolase, putative | chr4:18163763-18165653 REVERSEhighly similar to ( 659)ALFC_ORYSA affx|C37_12134;	-1.54666
1.3.6	PS.calvin cyle.aldolase	cit.21653.1.s1_at;	weakly similar to ( 102)AT4G38970| Symbols: | fructose-bisphosphate aldolase, putative | chr4:18163763-18165653 REVERSEvery weakly similar to (98.2)ALFC_ORYSA affx|C37_25258;	-2.00057
1.3.6	PS.calvin cyle.aldolase	cit.37249.1.s1_s_at;	weakly similar to ( 159)AT4G38970| Symbols: | fructose-bisphosphate aldolase, putative | chr4:18163763-18165653 REVERSEweakly similar to ( 174)ALFC_ORYSA affx|C37_43124;	-1.55639
1.3.7	PS.calvin cyle.FBPase	cit.3351.1.s1_s_at;	highly similar to ( 609)AT3G54050| Symbols: | fructose-1,6-bisphosphatase, putative / D-fructose-1,6-bisphosphate 1-phosphohydrolase, putative / FBPase, putative | chr3:20027929-20029505 FORWARDhighly similar to ( 629)F16P1_PEA affx|C37_04237;	-2.21809
1.3.7	PS.calvin cyle.FBPase	cit.4984.1.s1_at;	moderately similar to ( 268)AT5G64380| Symbols: | fructose-1,6-bisphosphatase family protein | chr5:25758568-25760250 FORWARDweakly similar to ( 135)F16P1_SPIOL affx|C37_06325;	-1.30402
1.3.8	PS.calvin cyle.transketolase	cit.451.1.s1_s_at;	moderately similar to ( 318)AT2G45290| Symbols: | transketolase, putative | chr2:18679811-18682663 FORWARDmoderately similar to ( 326)TKTC_MAIZE affx|C37_00556;	-1.29917
1.3.9	PS.calvin cyle.seduheptulose bisphosphatase	cit.12965.1.s1_s_at;	highly similar to ( 634)AT3G55800| Symbols: SBPASE | SBPASE (SEDOHEPTULOSE-BISPHOSPHATASE); phosphoric ester hydrolase/ sedoheptulose-bisphosphatase | chr3:20720619-20722400 FORWARDhighly similar to ( 621)S17P_SPIOL affx|C37_17201;	-1.98344
1.3.11	PS.calvin cyle.RPE	cit.2562.1.s1_at;	moderately similar to ( 473)AT5G61410| Symbols: EMB2728, RPE | RPE (EMBRYO DEFECTIVE 2728); ribulose-phosphate 3-epimerase | chr5:24701311-24703062 REVERSEmoderately similar to ( 479)RPE_SPIOL affx|C37_03239;	-1.2193
1.3.12	PS.calvin cyle.PRK	cit.11692.1.s1_s_at;	highly similar to ( 651)AT1G32060| Symbols: PRK | PRK (PHOSPHORIBULOKINASE); ATP binding / phosphoribulokinase/ protein binding | chr1:11532648-11534386 FORWARDhighly similar to ( 672)KPPR_MESCR affx|C37_15596;	-2.19986
1.3.13	PS.calvin cyle.rubisco interacting	cit.8821.1.s1_s_at;	highly similar to ( 741)AT2G39730| Symbols: RCA | RCA (RUBISCO ACTIVASE) | chr2:16578252-16580423 REVERSEhighly similar to ( 723)RCA_ORYSA affx|C37_12064;	-1.44371
1.3.13	PS.calvin cyle.rubisco interacting	cit.20550.1.s1_at;	weakly similar to ( 109)AT2G39730| Symbols: RCA | RCA (RUBISCO ACTIVASE) | chr2:16578252-16580423 REVERSEweakly similar to ( 128)RCA_MALDO affx|C37_43534;	-3.78385
1.3.13	PS.calvin cyle.rubisco interacting	cit.8821.1.s1_x_at;	highly similar to ( 741)AT2G39730| Symbols: RCA | RCA (RUBISCO ACTIVASE) | chr2:16578252-16580423 REVERSEhighly similar to ( 723)RCA_ORYSA affx|C37_12064;	-1.42042
1.3.13	PS.calvin cyle.rubisco interacting	cit.7049.1.s1_at;	moderately similar to ( 475)AT1G14030| Symbols: | ribulose-1,5 bisphosphate carboxylase oxygenase large subunit N-methyltransferase, putative | chr1:4805490-4807437 REVERSEmoderately similar to ( 462)RBCMT_TOBAC affx|C37_09417;	-1.54403
1.1.1.1	PS.lightreaction.photosystem II.LHC-II	cit.14671.1.s1_at;	weakly similar to ( 159)AT1G76570| Symbols: | chlorophyll A-B binding family protein | chr1:28734026-28735648 FORWARDvery weakly similar to (99.8)CB23_HORVU affx|C37_19448;	-1.56334
1.1.1.1	PS.lightreaction.photosystem II.LHC-II	cit.10415.1.s1_s_at;	moderately similar to ( 407)AT2G40100| Symbols: LHCB4.3 | LHCB4.3 (LIGHT HARVESTING COMPLEX PSII); chlorophyll binding | chr2:16752962-16754268 FORWARDmoderately similar to ( 248)CB29_CHLRE affx|C37_14024;	-1.65227
1.1.1.1	PS.lightreaction.photosystem II.LHC-II	cit.29925.1.s1_at;	moderately similar to ( 327)AT1G45474| Symbols: LHCA5 | LHCA5 (Photosystem I light harvesting complex gene 5) | chr1:17181793-17182879 FORWARDweakly similar to ( 179)CB12_PETHY affx|C37_08452;	-1.47527
1.1.1.1	PS.lightreaction.photosystem II.LHC-II	cit.9222.1.s1_at;	moderately similar to ( 459)AT4G10340| Symbols: LHCB5 | LHCB5 (LIGHT HARVESTING COMPLEX OF PHOTOSYSTEM II 5); chlorophyll binding | chr4:6408196-6409492 FORWARDmoderately similar to ( 213)CB2B_PINSY affx|C37_12551;	-1.8925
1.1.1.1	PS.lightreaction.photosystem II.LHC-II	cit.10417.1.s1_at;	moderately similar to ( 232)AT2G40100| Symbols: LHCB4.3 | LHCB4.3 (LIGHT HARVESTING COMPLEX PSII); chlorophyll binding | chr2:16752962-16754268 FORWARDweakly similar to ( 140)CB29_CHLRE affx|C37_14026;	-1.63588
1.1.1.1	PS.lightreaction.photosystem II.LHC-II	cit.9901.1.s1_s_at;	moderately similar to ( 436)AT1G61520| Symbols: LHCA3 | LHCA3 (Photosystem I light harvesting complex gene 3) | chr1:22704158-22704814 FORWARDweakly similar to ( 153)CB12_PETHY affx|C37_13382;	-1.51397
1.1.1.2	PS.lightreaction.photosystem II.PSII polypeptide subunits	cit.13236.1.s1_s_at;	moderately similar to ( 205)AT4G28660| Symbols: PSB28 | PSB28 (PHOTOSYSTEM II REACTION CENTER PSB28 PROTEIN) | chr4:14150014-14150939 FORWARD affx|C37_17537;	-2.61903
1.1.1.2	PS.lightreaction.photosystem II.PSII polypeptide subunits	cit.9106.1.s1_s_at;	highly similar to ( 535)AT3G50820| Symbols: PSBO2, PSBO-2 | PSBO-2/PSBO2 (PHOTOSYSTEM II SUBUNIT O-2); oxygen evolving/ poly(U) binding | chr3:18901989-18903292 REVERSEhighly similar to ( 575)PSBO_TOBAC affx|C37_12413;	-1.23757
1.1.1.2	PS.lightreaction.photosystem II.PSII polypeptide subunits	cit.10161.1.s1_s_at;	moderately similar to ( 286)AT1G44575| Symbols: PSBS, NPQ4 | NPQ4 (NONPHOTOCHEMICAL QUENCHING) | chr1:16874208-16874988 FORWARDmoderately similar to ( 310)PSBS_SPIOL affx|C37_13699;	-1.90566
1.1.1.2	PS.lightreaction.photosystem II.PSII polypeptide subunits	cit.8719.1.s1_s_at;	very weakly similar to (83.2)AT2G30570| Symbols: PSBW | PSBW (PHOTOSYSTEM II REACTION CENTER W) | chr2:13026403-13027130 REVERSEvery weakly similar to (85.1)PSBW_SPIOL affx|C37_11929;	-1.3682
1.1.1.2	PS.lightreaction.photosystem II.PSII polypeptide subunits	cit.17677.1.s1_at;	very weakly similar to (84.3)AT2G30570| Symbols: PSBW | PSBW (PHOTOSYSTEM II REACTION CENTER W) | chr2:13026403-13027130 REVERSEvery weakly similar to (88.2)PSBW_SPIOL affx|C37_11943;	-1.72889
1.1.1.2	PS.lightreaction.photosystem II.PSII polypeptide subunits	cit.16494.1.s1_at;	weakly similar to ( 119)AT5G51545| Symbols: LPA2 | LPA2 (LOW PSII ACCUMULATION2) | chr5:20953660-20954469 FORWARD affx|C37_22405;	-1.40849
1.1.1.2	PS.lightreaction.photosystem II.PSII polypeptide subunits	cit.39409.1.s1_at;	moderately similar to ( 229)AT5G11450| Symbols: | oxygen-evolving complex-related | chr5:3654476-3656358 FORWARD affx|C37_45769;	-1.3756
1.1.1.2	PS.lightreaction.photosystem II.PSII polypeptide subunits	cit.6147.1.s1_at;	weakly similar to ( 197)AT1G14150| Symbols: | oxygen evolving enhancer 3 (PsbQ) family protein | chr1:4839882-4840629 FORWARD affx|C37_07915;	-1.7908
1.1.1.2	PS.lightreaction.photosystem II.PSII polypeptide subunits	cit.7504.1.s1_at;	moderately similar to ( 246)AT2G39470| Symbols: PPL2 | PPL2 (PSBP-LIKE PROTEIN 2); calcium ion binding | chr2:16483413-16484480 FORWARD affx|C37_10197;	-1.58119
1.1.1.2	PS.lightreaction.photosystem II.PSII polypeptide subunits	cit.13238.1.s1_at;	moderately similar to ( 204)AT4G28660| Symbols: PSB28 | PSB28 (PHOTOSYSTEM II REACTION CENTER PSB28 PROTEIN) | chr4:14150014-14150939 FORWARD affx|C37_17539;	-2.06948
1.1.1.2	PS.lightreaction.photosystem II.PSII polypeptide subunits	cit.38474.1.s1_at;	weakly similar to ( 175)AT3G56650| Symbols: | thylakoid lumenal 20 kDa protein | chr3:20995786-20996892 FORWARD affx|C37_44410;	-1.38698
1.1.1.2	PS.lightreaction.photosystem II.PSII polypeptide subunits	cit.19900.1.s1_at;	weakly similar to ( 118)AT5G02120| Symbols: OHP | OHP (ONE HELIX PROTEIN) | chr5:419141-419630 FORWARD affx|C37_28988;	-1.37513
1.1.1.2	PS.lightreaction.photosystem II.PSII polypeptide subunits	cit.31219.1.s1_at;	moderately similar to ( 296)AT4G15510| Symbols: | photosystem II reaction center PsbP family protein | chr4:8861349-8862527 FORWARD affx|C37_21367;	-1.35966
1.1.1.2	PS.lightreaction.photosystem II.PSII polypeptide subunits	cit.10162.1.s1_at;	moderately similar to ( 287)AT1G44575| Symbols: PSBS, NPQ4 | NPQ4 (NONPHOTOCHEMICAL QUENCHING) | chr1:16874208-16874988 FORWARDmoderately similar to ( 311)PSBS_SPIOL affx|C37_13700;	-1.74972
1.1.1.2	PS.lightreaction.photosystem II.PSII polypeptide subunits	cit.6148.1.s1_s_at;	weakly similar to ( 196)AT1G14150| Symbols: | oxygen evolving enhancer 3 (PsbQ) family protein | chr1:4839882-4840629 FORWARD affx|C37_07916;	-1.88212
1.1.1.2	PS.lightreaction.photosystem II.PSII polypeptide subunits	cit.5392.1.s1_s_at;	weakly similar to ( 192)AT1G03600| Symbols: | photosystem II family protein | chr1:898915-899439 FORWARD affx|C37_06839;	-1.77327
1.1.2.2	PS.lightreaction.photosystem I.PSI polypeptide subunits	cit.30471.1.s1_s_at;	weakly similar to ( 124)AT5G64040| Symbols: PSAN | PSAN (photosystem I reaction center subunit PSI-N); calmodulin binding | chr5:25645916-25646635 REVERSEweakly similar to ( 124)PSAN_MAIZE affx|C37_11916;	-1.30951
1.1.2.2	PS.lightreaction.photosystem I.PSI polypeptide subunits	cit.30551.1.s1_at;	moderately similar to ( 266)AT4G12800| Symbols: PSAL | PSAL (photosystem I subunit L) | chr4:7521466-7522490 FORWARDmoderately similar to ( 273)PSAL_CUCSA affx|C37_13560;	-1.93472
1.1.2.2	PS.lightreaction.photosystem I.PSI polypeptide subunits	cit.30658.1.s1_at;	weakly similar to ( 120)AT2G46820| Symbols: PTAC8, TMP14, PSAP, PSI-P | PSAP/PSI-P/PTAC8/TMP14 (THYLAKOID MEMBRANE PHOSPHOPROTEIN OF 14 KDA) | chr2:19250798-19251939 FORWARD affx|C37_15834;	-2.33217
1.1.2.2	PS.lightreaction.photosystem I.PSI polypeptide subunits	cit.8714.1.s1_s_at;	moderately similar to ( 204)AT5G64040| Symbols: PSAN | PSAN (photosystem I reaction center subunit PSI-N); calmodulin binding | chr5:25645916-25646635 REVERSEweakly similar to ( 164)PSAN_MAIZE affx|C37_11922;	-1.32498
1.1.2.2	PS.lightreaction.photosystem I.PSI polypeptide subunits	cit.1402.1.s1_s_at;	weakly similar to ( 178)AT1G52230| Symbols: PSAH2, PSAH-2, PSI-H | PSAH-2/PSAH2/PSI-H (PHOTOSYSTEM I SUBUNIT H-2) | chr1:19458571-19459177 FORWARDweakly similar to ( 181)PSAH_BRARA affx|C37_01769;	-1.22764
1.1.2.2	PS.lightreaction.photosystem I.PSI polypeptide subunits	cit.11876.1.s1_s_at;	weakly similar to ( 159)AT2G46820| Symbols: PTAC8, TMP14, PSAP, PSI-P | PSAP/PSI-P/PTAC8/TMP14 (THYLAKOID MEMBRANE PHOSPHOPROTEIN OF 14 KDA) | chr2:19250798-19251939 FORWARD affx|C37_15835;	-1.29742
1.1.2.2	PS.lightreaction.photosystem I.PSI polypeptide subunits	cit.21356.1.s1_s_at;	weakly similar to ( 166)AT1G30380| Symbols: PSAK | PSAK (PHOTOSYSTEM I SUBUNIT K) | chr1:10722307-10722995 FORWARDweakly similar to ( 169)PSAK_MEDSA affx|C37_46760;	-1.27141
1.1.3	PS.lightreaction.cytochrome b6/f	cit.10097.1.s1_s_at;	moderately similar to ( 345)AT4G03280| Symbols: PGR1, PETC | PETC (PHOTOSYNTHETIC ELECTRON TRANSFER C) | chr4:1440462-1441717 FORWARDmoderately similar to ( 346)UCRIA_PEA affx|C37_13623;	-1.39544
1.1.3	PS.lightreaction.cytochrome b6/f	cit.9493.1.s1_s_at;	weakly similar to ( 127)AT2G26500| Symbols: | cytochrome b6f complex subunit (petM), putative | chr2:11277448-11277825 FORWARD affx|C37_12883;	-1.66535
1.1.4	PS.lightreaction.ATP synthase	cit.25453.1.s1_at;	weakly similar to ( 137)AT2G31040| Symbols: | ATP synthase protein I -related | chr2:13216171-13218089 REVERSE affx|C37_30568;	-1.89779
1.1.4	PS.lightreaction.ATP synthase	cit.12228.1.s1_s_at;	highly similar to ( 526)AT4G04640| Symbols: ATPC1 | ATPC1 (ATP synthase gamma chain 1) | chr4:2350759-2351880 REVERSEhighly similar to ( 546)ATPG_TOBAC affx|C37_16282;	-1.46001
1.1.4	PS.lightreaction.ATP synthase	cit.12888.1.s1_s_at;	moderately similar to ( 246)AT4G09650| Symbols: | ATP synthase delta chain, chloroplast, putative / H(+)-transporting two-sector ATPase, delta (OSCP) subunit, putative | chr4:6100796-6101500 FORWARDmoderately similar to ( 239)ATPD_TOBAC affx|C37_17112;	-1.33543
1.1.4	PS.lightreaction.ATP synthase	cit.14805.1.s1_at;	moderately similar to ( 400)ATCG00150| Symbols: ATPI | Encodes a subunit of ATPase complex CF0, which is a proton channel that supplies the proton motive force to drive ATP synthesis by CF1 portion of the complex. | chrC:14021-14770 REVERSEmoderately similar to ( 400)ATPI_OENHO affx|C37_19647;	-1.44966
1.1.4	PS.lightreaction.ATP synthase	cit.12953.1.s1_at;	moderately similar to ( 469)AT1G15700| Symbols: ATPC2 | ATPC2 (ATP synthase gamma chain 2) | chr1:5402624-5403784 REVERSEmoderately similar to ( 471)ATPG_TOBAC affx|C37_17184;	-1.2967
1.1.4	PS.lightreaction.ATP synthase	cit.4737.1.s1_s_at;	moderately similar to ( 434)AT2G31040| Symbols: | ATP synthase protein I -related | chr2:13216171-13218089 REVERSE affx|C37_06006;	-1.31955
1.1.4	PS.lightreaction.ATP synthase	cit.4764.1.s1_at;	weakly similar to ( 187)AT4G32260| Symbols: | ATP synthase family | chr4:15573865-15574592 REVERSEweakly similar to ( 188)ATPX_SPIOL affx|C37_06037;	-1.80764
1.1.4	PS.lightreaction.ATP synthase	cit.17975.1.s1_s_at;	moderately similar to ( 205)ATCG00120| Symbols: ATPA | Encodes the ATPase alpha subunit, which is a subunit of ATP synthase and part of the CF1 portion which catalyzes the conversion of ADP to ATP using the proton motive force. This complex is located in the thylakoid membrane of the chloroplast. | chrC:9938-11461 REVERSEmoderately similar to ( 212)ATPA_TOBAC affx|C37_17485;	-1.63511
1.1.5.2	PS.lightreaction.other electron carrier (ox/red).ferredoxin	cit.17233.1.s1_at;	weakly similar to ( 191)AT1G60950| Symbols: ATFD2, FED A | FED A (FERREDOXIN 2); 2 iron, 2 sulfur cluster binding / electron carrier/ iron-sulfur cluster binding | chr1:22448230-22448676 FORWARDweakly similar to ( 188)FER_CAPAN affx|C37_05798;	-5.16943
1.1.5.2	PS.lightreaction.other electron carrier (ox/red).ferredoxin	cit.6529.1.s1_at;	weakly similar to ( 149)AT1G02180| Symbols: | ferredoxin-related | chr1:413619-414505 REVERSE affx|C37_08523;	1.59203
1.1.5.2	PS.lightreaction.other electron carrier (ox/red).ferredoxin	cit.7901.1.s1_at;	weakly similar to ( 161)AT4G32590| Symbols: | ferredoxin-related | chr4:15721423-15722787 FORWARD affx|C37_10844;	-1.5724
1.1.5.3	PS.lightreaction.other electron carrier (ox/red).ferredoxin reductase	cit.529.1.s1_at;	highly similar to ( 595)AT5G66190| Symbols: ATLFNR1 | ATLFNR1 (LEAF FNR 1); poly(U) binding | chr5:26468429-26469842 REVERSEhighly similar to ( 614)FENR1_TOBAC affx|C37_00643;	-1.41315
1.1.5.3	PS.lightreaction.other electron carrier (ox/red).ferredoxin reductase	cit.348.1.s1_s_at;	weakly similar to ( 105)AT1G20020| Symbols: ATLFNR2 | ATLFNR2 (LEAF FNR 2); poly(U) binding | chr1:6942842-6944859 FORWARDweakly similar to ( 105)FENR_MESCR affx|C37_00434;	-1.41549
1.1.6	PS.lightreaction.NADH DH	cit.6682.1.s1_at;	moderately similar to ( 203)AT4G37920| Symbols: | similar to unknown protein [Arabidopsis thaliana] (TAIR:AT1G36320.1); similar to putative protein [Medicago truncatula] (GB:ABY48137.1) | chr4:17828532-17830311 REVERSE affx|C37_08771;	-1.62434
1.1.30	PS.lightreaction.state transition	cit.4410.1.s1_at;	highly similar to ( 857)AT1G68830| Symbols: STN7 | STN7 (STT7 HOMOLOG STN7); kinase/ protein kinase | chr1:25876317-25879136 REVERSEmoderately similar to ( 332)STT7_CHLRE affx|C37_05595;	-2.09021
1.1.40	PS.lightreaction.cyclic electron flow-chlororespiration	cit.25007.1.s1_at;	moderately similar to ( 274)ATCG01250| Symbols: NDHB.2 | NADH dehydrogenase ND2 | chrC:141854-143708 FORWARDmoderately similar to ( 362)NU2C_SOLTU affx|C37_23900;	-2.02407
1.1.40	PS.lightreaction.cyclic electron flow-chlororespiration	cit.2850.1.s1_s_at;	weakly similar to ( 167)AT2G05620| Symbols: PGR5 | PGR5 (PROTON GRADIENT REGULATION 5) | chr2:2081201-2081684 REVERSE affx|C37_03605;	-2.84997
1.2.1	PS.photorespiration.phosphoglycolate phosphatase	cit.24053.1.s1_at;	weakly similar to ( 104)AT5G36790| Symbols: | phosphoglycolate phosphatase, putative | chr5:14498459-14500960 REVERSE affx|C37_40447;	-1.59797
1.2.2	PS.photorespiration.glycolate oxydase	cit.2099.1.s1_at;	moderately similar to ( 353)AT3G14420| Symbols: | (S)-2-hydroxy-acid oxidase, peroxisomal, putative / glycolate oxidase, putative / short chain alpha-hydroxy acid oxidase, putative | chr3:4821906-4823906 FORWARDmoderately similar to ( 345)GOX_SPIOL affx|C37_02648;	-1.36675
1.2.2	PS.photorespiration.glycolate oxydase	cit.2098.1.s1_s_at;	highly similar to ( 607)AT3G14420| Symbols: | (S)-2-hydroxy-acid oxidase, peroxisomal, putative / glycolate oxidase, putative / short chain alpha-hydroxy acid oxidase, putative | chr3:4821906-4823906 FORWARDhighly similar to ( 600)GOX_SPIOL affx|C37_02647;	-1.74261
1.2.4	PS.photorespiration.glycine cleavage	cit.2838.1.s1_at;	moderately similar to ( 264)AT1G32470| Symbols: | glycine cleavage system H protein, mitochondrial, putative | chr1:11739459-11740226 REVERSEmoderately similar to ( 265)GCSH_FLAPR affx|C37_03590;	-1.74201
1.2.4	PS.photorespiration.glycine cleavage	cit.1835.1.s1_s_at;	moderately similar to ( 232)AT2G35120| Symbols: | glycine cleavage system H protein, mitochondrial, putative | chr2:14812992-14814353 REVERSEweakly similar to ( 195)GCSH_FLAPR affx|C37_02321;	1.59293
1.2.5	PS.photorespiration.serine hydroxymethyltransferase	cit.10148.1.s1_s_at;	moderately similar to ( 355)AT4G37930| Symbols: STM, SHMT1, SHM1 | SHM1 (SERINE HYDROXYMETHYLTRANSFERASE 1); glycine hydroxymethyltransferase/ poly(U) binding | chr4:17831885-17834736 REVERSEmoderately similar to ( 377)GLYN_FLAPR affx|C37_13684;	-1.87588
19.3	tetrapyrrole synthesis.GSA	cit.7287.1.s1_at;	moderately similar to ( 380)AT1G80600| Symbols: | acetylornithine aminotransferase, mitochondrial, putative / acetylornithine transaminase, putative / AOTA, putative / ACOAT, putative | chr1:30303567-30305405 REVERSEvery weakly similar to (92.8)GSA_BRANA affx|C37_09846;	1.51233
19.9	tetrapyrrole synthesis.protoporphyrin IX oxidase	cit.18899.1.s1_at;	very weakly similar to (82.4)AT4G01690| Symbols: HEMG1, PPOX | PPOX (PROTOPORPHYRINOGEN OXIDASE); protoporphyrinogen oxidase | chr4:729929-732309 FORWARDvery weakly similar to (82.0)PPOC_TOBAC affx|C37_25781;	-1.30037
19.1	tetrapyrrole synthesis.magnesium chelatase	cit.21132.1.s1_s_at;	moderately similar to ( 238)AT5G45930| Symbols: CHL I2, CHLI-2, CHLI2 | CHLI2; magnesium chelatase | chr5:18645322-18646792 FORWARDmoderately similar to ( 257)CHLI_SOYBN affx|C37_46172;	-1.25603
19.1	tetrapyrrole synthesis.magnesium chelatase	cit.12418.1.s1_s_at;	highly similar to ( 544)AT5G13630| Symbols: CCH, CHLH, CCH1, GUN5 | GUN5 (GENOMES UNCOUPLED 5) | chr5:4387923-4392085 REVERSE affx|C37_16515;	-2.47388
19.12	tetrapyrrole synthesis.magnesium-protoporphyrin IX monomethyl ester (oxidative) cyclase	cit.967.1.s1_s_at;	highly similar to ( 674)AT3G56940| Symbols: CRD1, CHL27, ACSF, AT103 | AT103 (DICARBOXYLATE DIIRON 1) | chr3:21087573-21089248 FORWARDhighly similar to ( 700)CRD1_GOSHI affx|C37_01222;	-1.28289
19.16	tetrapyrrole synthesis.chlorophyll b synthase	cit.6420.1.s1_s_at;	moderately similar to ( 275)AT1G44446| Symbols: ATCAO, CAO, CH1 | CH1 (CHLOROPHYLL B BIOSYNTHESIS); chlorophyllide a oxygenase | chr1:16851572-16853592 REVERSEmoderately similar to ( 274)CAO_ORYSA affx|C37_08352;	-1.81033
19.16	tetrapyrrole synthesis.chlorophyll b synthase	cit.6420.1.s1_at;	moderately similar to ( 275)AT1G44446| Symbols: ATCAO, CAO, CH1 | CH1 (CHLOROPHYLL B BIOSYNTHESIS); chlorophyllide a oxygenase | chr1:16851572-16853592 REVERSEmoderately similar to ( 274)CAO_ORYSA affx|C37_08352;	-1.83802
19.4	tetrapyrrole synthesis.regulation	cit.20629.1.s1_at;	weakly similar to ( 108)AT3G14110| Symbols: FLU | FLU (FLUORESCENT IN BLUE LIGHT); binding | chr3:4676229-4677609 REVERSE affx|C37_44900;	-1.30246
19.4	tetrapyrrole synthesis.regulation	cit.4503.1.s1_at;	moderately similar to ( 221)AT3G59400| Symbols: GUN4 | GUN4 (Genomes uncoupled 4) | chr3:21959858-21960655 REVERSE affx|C37_05709;	-1.75187
19.99	tetrapyrrole synthesis.unspecified	cit.40325.1.s1_s_at;	weakly similar to ( 174)AT1G19670| Symbols: CORI1, ATHCOR1 | ATCLH1 (CORONATINE-INDUCED PROTEIN 1) | chr1:6803787-6804914 REVERSEmoderately similar to ( 214)CLH1_CITSI affx|C37_47318;	-2.67376
19.99	tetrapyrrole synthesis.unspecified	cit.6324.1.s1_at;	moderately similar to ( 269)AT5G43860| Symbols: ATCLH2 | ATCLH2 (Chlorophyll-chlorophyllido hydrolase 2) | chr5:17647719-17649411 FORWARDweakly similar to ( 149)CLH1_CITSI affx|C37_08199;	-1.64097
9.1	mitochondrial electron transport / ATP synthesis.NADH-DH	cit.31079.1.s1_at;	weakly similar to ( 164)AT4G37925| Symbols: NDH-M | NDH-M (SUBUNIT NDH-M OF NAD(P)H:PLASTOQUINONE DEHYDROGENASE COMPLEX) | chr4:17830742-17831479 REVERSE affx|C37_20554;	-1.83094
9.1.2	mitochondrial electron transport / ATP synthesis.NADH-DH.localisation not clear	cit.17148.1.s1_at;	weakly similar to ( 131)AT5G11770| Symbols: | NADH-ubiquinone oxidoreductase 20 kDa subunit, mitochondrial | chr5:3791149-3792930 REVERSEweakly similar to ( 135)NDUS7_BRAOL affx|C37_04191;	-1.9878
9.1.2	mitochondrial electron transport / ATP synthesis.NADH-DH.localisation not clear	cit.1603.1.s1_at;	weakly similar to ( 167)AT3G03070| Symbols: | NADH-ubiquinone oxidoreductase-related | chr3:696600-698076 REVERSE affx|C37_02027;	1.52033
9.1.2	mitochondrial electron transport / ATP synthesis.NADH-DH.localisation not clear	cit.676.1.s1_at;	moderately similar to ( 285)AT5G52840| Symbols: | NADH-ubiquinone oxidoreductase-related | chr5:21430944-21432020 FORWARD affx|C37_00822;	1.60037
9.4	mitochondrial electron transport / ATP synthesis.alternative oxidase	cit.12874.1.s1_at;	moderately similar to ( 409)AT5G64210| Symbols: AOX2 | AOX2 (alternative oxidase 2); alternative oxidase | chr5:25701191-25702890 REVERSEmoderately similar to ( 419)AOX2_SOYBN affx|C37_17096;	-1.47349
9.4	mitochondrial electron transport / ATP synthesis.alternative oxidase	cit.28359.1.s1_at;	very weakly similar to (87.4)AT5G64210| Symbols: AOX2 | AOX2 (alternative oxidase 2); alternative oxidase | chr5:25701191-25702890 REVERSEvery weakly similar to (91.7)AOX2_SOYBN affx|C37_38940;	-1.50671
9.4	mitochondrial electron transport / ATP synthesis.alternative oxidase	cit.16112.1.s1_at;	very weakly similar to (87.4)AT3G22370| Symbols: ATAOX1A, AOX1A | AOX1A (alternative oxidase 1A); alternative oxidase | chr3:7906897-7908423 FORWARDvery weakly similar to (89.4)AOX1_SOYBN affx|C37_21789;	3.75162
9.4	mitochondrial electron transport / ATP synthesis.alternative oxidase	cit.12874.1.s1_s_at;	moderately similar to ( 409)AT5G64210| Symbols: AOX2 | AOX2 (alternative oxidase 2); alternative oxidase | chr5:25701191-25702890 REVERSEmoderately similar to ( 419)AOX2_SOYBN affx|C37_17096;	-1.37519
9.5	mitochondrial electron transport / ATP synthesis.cytochrome c reductase	cit.22362.1.s1_at;	weakly similar to ( 137)AT1G15120| Symbols: | ubiquinol-cytochrome C reductase complex 7.8 kDa protein, putative / mitochondrial hinge protein, putative | chr1:5203086-5203892 FORWARDweakly similar to ( 117)UCRH_SOLTU affx|C37_31416;	1.23909
9.5	mitochondrial electron transport / ATP synthesis.cytochrome c reductase	cit.8427.1.s1_s_at;	moderately similar to ( 377)AT5G13430| Symbols: | ubiquinol-cytochrome C reductase iron-sulfur subunit, mitochondrial, putative / Rieske iron-sulfur protein, putative | chr5:4305417-4307402 REVERSEmoderately similar to ( 403)UCRI1_TOBAC affx|C37_11549;	1.35829
9.5	mitochondrial electron transport / ATP synthesis.cytochrome c reductase	cit.22362.1.s1_s_at;	weakly similar to ( 137)AT1G15120| Symbols: | ubiquinol-cytochrome C reductase complex 7.8 kDa protein, putative / mitochondrial hinge protein, putative | chr1:5203086-5203892 FORWARDweakly similar to ( 117)UCRH_SOLTU affx|C37_31416;	1.20924
9.6	mitochondrial electron transport / ATP synthesis.cytochrome c	cit.21973.1.s1_s_at;	weakly similar to ( 149)AT5G40810| Symbols: | cytochrome c1, putative | chr5:16357428-16359555 FORWARDweakly similar to ( 149)CY11_SOLTU affx|C37_29646;	-1.29186
9.7	mitochondrial electron transport / ATP synthesis.cytochrome c oxidase	cit.1485.1.s1_at;	weakly similar to ( 166)AT3G15640| Symbols: | cytochrome c oxidase family protein | chr3:5299280-5301378 FORWARD affx|C37_01877;	1.32892
9.7	mitochondrial electron transport / ATP synthesis.cytochrome c oxidase	cit.11363.1.s1_s_at;	weakly similar to ( 135)AT4G37830| Symbols: | cytochrome c oxidase-related | chr4:17787666-17788756 REVERSE affx|C37_15198;	1.32468
9.9	mitochondrial electron transport / ATP synthesis.F1-ATPase	cit.10090.1.s1_s_at;	highly similar to ( 519)AT2G33040| Symbols: | ATP synthase gamma chain, mitochondrial (ATPC) | chr2:14026055-14028124 REVERSEhighly similar to ( 531)ATPG3_IPOBA affx|C37_13614;	1.17312
9.9	mitochondrial electron transport / ATP synthesis.F1-ATPase	cit.17913.1.s1_at;	weakly similar to ( 193)AT3G49190| Symbols: | condensation domain-containing protein | chr3:18242973-18245361 REVERSE affx|C37_16370;	-1.60478
9.9	mitochondrial electron transport / ATP synthesis.F1-ATPase	cit.9507.1.s1_s_at;	moderately similar to ( 205)AT5G13450| Symbols: | ATP synthase delta chain, mitochondrial, putative / H(+)-transporting two-sector ATPase, delta (OSCP) subunit, putative | chr5:4310561-4311944 REVERSEmoderately similar to ( 253)ATPO_IPOBA affx|C37_12900;	1.19886
9.9	mitochondrial electron transport / ATP synthesis.F1-ATPase	cit.17093.1.s1_s_at;	very weakly similar to (94.0)AT5G59613| Symbols: | similar to unknown protein [Arabidopsis thaliana] (TAIR:AT3G46430.1); similar to mitochondrial ATP synthase 6 KD subunit [Oryza sativa (japonica cultivar-group)] (GB:BAB21526.1) | chr5:24033388-24033726 REVERSE affx|C37_03170;	1.20773
9.9	mitochondrial electron transport / ATP synthesis.F1-ATPase	cit.11071.1.s1_x_at;	moderately similar to ( 210)AT2G19680| Symbols: | mitochondrial ATP synthase g subunit family protein | chr2:8508947-8509704 FORWARD affx|C37_14830;	1.2843
9.9	mitochondrial electron transport / ATP synthesis.F1-ATPase	cit.11070.1.s1_s_at;	moderately similar to ( 210)AT2G19680| Symbols: | mitochondrial ATP synthase g subunit family protein | chr2:8508947-8509704 FORWARD affx|C37_14829;	1.23065
9.9	mitochondrial electron transport / ATP synthesis.F1-ATPase	cit.30552.1.s1_at;	weakly similar to ( 132)AT3G52300| Symbols: ATPQ | ATPQ (ATP SYNTHASE D CHAIN, MITOCHONDRIAL) | chr3:19407667-19408844 FORWARD affx|C37_13599;	2.19546
9.9	mitochondrial electron transport / ATP synthesis.F1-ATPase	cit.10078.1.s1_s_at;	moderately similar to ( 269)AT3G52300| Symbols: ATPQ | ATPQ (ATP SYNTHASE D CHAIN, MITOCHONDRIAL) | chr3:19407667-19408844 FORWARD affx|C37_13597;	1.1901
9.9	mitochondrial electron transport / ATP synthesis.F1-ATPase	cit.11071.1.s1_at;	moderately similar to ( 210)AT2G19680| Symbols: | mitochondrial ATP synthase g subunit family protein | chr2:8508947-8509704 FORWARD affx|C37_14830;	1.27638
9.9	mitochondrial electron transport / ATP synthesis.F1-ATPase	cit.30575.1.s1_s_at;	moderately similar to ( 288)AT5G47030| Symbols: | ATP synthase delta' chain, mitochondrial | chr5:19107611-19109261 FORWARDmoderately similar to ( 286)ATP4_IPOBA affx|C37_14033;	1.21162
12.2.1	N-metabolism.ammonia metabolism.glutamate synthase	cit.11978.1.s1_s_at;	nearly identical (1424)AT5G04140| Symbols: GLU1, GLS1, GLUS | GLS1/GLU1/GLUS (FERREDOXIN-DEPENDENT GLUTAMATE SYNTHASE 1) | chr5:1130032-1138187 FORWARDnearly identical (1415)GLTB_SPIOL affx|C37_15966;	-1.70554
12.2.1	N-metabolism.ammonia metabolism.glutamate synthase	cit.11977.1.s1_at;	weakly similar to ( 140)AT5G04140| Symbols: GLU1, GLS1, GLUS | GLS1/GLU1/GLUS (FERREDOXIN-DEPENDENT GLUTAMATE SYNTHASE 1) | chr5:1130032-1138187 FORWARDweakly similar to ( 129)GLTB_SPIOL affx|C37_15965;	-1.82098
12.2.2	N-metabolism.ammonia metabolism.glutamine synthase	cit.10284.1.s1_s_at;	highly similar to ( 745)AT5G35630| Symbols: GLN2, ATGSL1, GS2 | GS2 (GLUTAMINE SYNTHETASE 2) | chr5:13848450-13850469 FORWARDhighly similar to ( 779)GLNA2_DAUCA affx|C37_13852;	-1.51103
12.2.2	N-metabolism.ammonia metabolism.glutamine synthase	cit.17746.1.s1_s_at;	weakly similar to ( 199)AT5G37600| Symbols: ATGSR1 | ATGSR1 (Arabidopsis thaliana glutamine synthase clone R1); glutamate-ammonia ligase | chr5:14950804-14952886 REVERSEmoderately similar to ( 207)GLNA1_VITVI affx|C37_13065;	1.75491
12.2.2	N-metabolism.ammonia metabolism.glutamine synthase	cit.9632.1.s1_at;	moderately similar to ( 299)AT5G37600| Symbols: ATGSR1 | ATGSR1 (Arabidopsis thaliana glutamine synthase clone R1); glutamate-ammonia ligase | chr5:14950804-14952886 REVERSEmoderately similar to ( 311)GLNA2_VITVI affx|C37_13066;	1.41091
12.2.2	N-metabolism.ammonia metabolism.glutamine synthase	cit.28391.1.s1_s_at;	very weakly similar to (95.1)AT5G35630| Symbols: GLN2, ATGSL1, GS2 | GS2 (GLUTAMINE SYNTHETASE 2) | chr5:13848450-13850469 FORWARDvery weakly similar to (95.1)GLNAC_BRANA affx|C37_39177;	-1.38337
12.2.2	N-metabolism.ammonia metabolism.glutamine synthase	cit.9618.1.s1_s_at;	highly similar to ( 588)AT5G37600| Symbols: ATGSR1 | ATGSR1 (Arabidopsis thaliana glutamine synthase clone R1); glutamate-ammonia ligase | chr5:14950804-14952886 REVERSEhighly similar to ( 605)GLNA1_MEDSA affx|C37_13045;	1.61296
12.2.2	N-metabolism.ammonia metabolism.glutamine synthase	cit.9634.1.s1_at;	highly similar to ( 620)AT5G37600| Symbols: ATGSR1 | ATGSR1 (Arabidopsis thaliana glutamine synthase clone R1); glutamate-ammonia ligase | chr5:14950804-14952886 REVERSEhighly similar to ( 623)GLNA2_VITVI affx|C37_13068;	2.04911
12.2.99	N-metabolism.ammonia metabolism.unspecified	cit.18094.1.s1_at;	moderately similar to ( 378)AT5G57440| Symbols: GPP2, GS1 | GS1 (GLYCEROL-3-PHOSPHATASE 2); hydrolase | chr5:23288744-23290126 REVERSE affx|C37_19846;	1.74008
12.1.1	N-metabolism.nitrate metabolism.NR	cit.12666.1.s1_s_at;	moderately similar to ( 457)AT5G17770| Symbols: CBR1, ATCBR | ATCBR (NADH:CYTOCHROME B5 REDUCTASE 1) | chr5:5864545-5866497 REVERSEweakly similar to ( 191)NIA1_ORYSA affx|C37_16837;	1.41857
12.1.1	N-metabolism.nitrate metabolism.NR	cit.12667.1.s1_at;	moderately similar to ( 305)AT5G17770| Symbols: CBR1, ATCBR | ATCBR (NADH:CYTOCHROME B5 REDUCTASE 1) | chr5:5864545-5866497 REVERSEweakly similar to ( 144)NIA1_ORYSA affx|C37_16838;	1.3133
12.1.1	N-metabolism.nitrate metabolism.NR	cit.6374.1.s1_at;	highly similar to ( 501)AT5G20080| Symbols: | NADH-cytochrome b5 reductase, putative | chr5:6782710-6786362 FORWARDweakly similar to ( 142)NIA1_PHAVU affx|C37_08276;	1.35539
12.3.1	N-metabolism.N-degradation.glutamate dehydrogenase	cit.5386.1.s1_s_at;	moderately similar to ( 218)AT5G18170| Symbols: GDH1 | GDH1 (GLUTAMATE DEHYDROGENASE 1); oxidoreductase | chr5:6006174-6008250 FORWARDmoderately similar to ( 214)DHEB_NICPL affx|C37_06832;	2.13244
14.3	S-assimilation.sulfite redox	cit.10076.1.s1_s_at;	weakly similar to ( 118)AT5G04590| Symbols: SIR | SIR (sulfite reductase); sulfite reductase (ferredoxin) | chr5:1319405-1322299 FORWARD affx|C37_13595;	1.55827
25	C1-metabolism	cit.22727.1.s1_at;	weakly similar to ( 147)AT2G44160| Symbols: MTHFR2 | MTHFR2 (METHYLENETETRAHYDROFOLATE REDUCTASE 2); methylenetetrahydrofolate reductase (NADPH) | chr2:18269377-18272261 FORWARDweakly similar to ( 136)MTHR_ORYSA affx|C37_33115;	1.5401
25	C1-metabolism	cit.14444.1.s1_at;	moderately similar to ( 293)AT4G31120| Symbols: SKB1, ATPRMT5, PRMT5 | ATPRMT5/PRMT5/SKB1 (SHK1 BINDING PROTEIN 1); protein methyltransferase | chr4:15132544-15136574 REVERSE affx|C37_19144;	-1.38772
25	C1-metabolism	cit.12270.1.s1_s_at;	moderately similar to ( 296)AT5G16450| Symbols: | dimethylmenaquinone methyltransferase family protein | chr5:5374360-5375345 FORWARD affx|C37_16341;	1.65091
25	C1-metabolism	cit.10148.1.s1_s_at;	moderately similar to ( 355)AT4G37930| Symbols: STM, SHMT1, SHM1 | SHM1 (SERINE HYDROXYMETHYLTRANSFERASE 1); glycine hydroxymethyltransferase/ poly(U) binding | chr4:17831885-17834736 REVERSEmoderately similar to ( 377)GLYN_FLAPR affx|C37_13684;	-1.87588
25	C1-metabolism	cit.21906.1.s1_at;	weakly similar to ( 128)AT5G14780| Symbols: FDH | FDH (FORMATE DEHYDROGENASE); NAD binding / binding / catalytic/ cofactor binding / oxidoreductase, acting on the CH-OH group of donors, NAD or NADP as acceptor | chr5:4777046-4779193 FORWARDweakly similar to ( 130)FDH_SOLTU affx|C37_29472;	1.32175
25.3	C1-metabolism.dihydropteridine diphosphokinase	cit.39583.1.s1_at;	weakly similar to ( 166)AT4G30000| Symbols: | dihydropterin pyrophosphokinase, putative / dihydropteroate synthase, putative / DHPS, putative | chr4:14670530-14672403 REVERSE affx|C37_46043;	-1.26262
25.4	C1-metabolism.5-formyltetrahydrofolate cyclo-ligase	cit.6892.1.s1_at;	very weakly similar to (89.4)AT1G76730| Symbols: | 5-formyltetrahydrofolate cyclo-ligase family protein | chr1:28807927-28809597 REVERSE affx|C37_09107;	-1.41741
23.1.1.1	nucleotide metabolism.synthesis.pyrimidine.carbamoyl phosphate synthetase	cit.12999.1.s1_at;	moderately similar to ( 330)AT3G27740| Symbols: CARA | CARA (CARBAMOYL PHOSPHATE SYNTHETASE A) | chr3:10282707-10285029 REVERSE affx|C37_17241;	-1.23579
23.1.1.2	nucleotide metabolism.synthesis.pyrimidine.aspartate transcarbamoylase	cit.26477.1.s1_at;	moderately similar to ( 289)AT3G20330| Symbols: | aspartate carabmoyltransferase, chloroplast / aspartate transcarbamylase / ATCase (PYRB) | chr3:7090360-7091910 REVERSEmoderately similar to ( 297)PYRB3_PEA affx|C37_33501;	1.25573
23.1.1.3	nucleotide metabolism.synthesis.pyrimidine.dihydroorotase	cit.14327.1.s1_s_at;	highly similar to ( 557)AT4G22930| Symbols: DHOASE, PYR4 | PYR4 (PYRIMIDIN 4); dihydroorotase | chr4:12019326-12021211 FORWARD affx|C37_18985;	-1.66652
23.1.1.10	nucleotide metabolism.synthesis.pyrimidine.CTP synthetase	cit.12728.1.s1_at;	moderately similar to ( 500)AT1G30820| Symbols: | CTP synthase, putative / UTP--ammonia ligase, putative | chr1:10945232-10948806 REVERSE affx|C37_16917;	1.7179
23.1.2.1	nucleotide metabolism.synthesis.purine.amidophosphoribosyltransferase	cit.6579.1.s1_at;	highly similar to ( 586)AT4G34740| Symbols: CIA1, ATPURF2, ATD2, ATASE2 | ATASE2 (GLN PHOSPHORIBOSYL PYROPHOSPHATE AMIDOTRANSFERASE 2); amidophosphoribosyltransferase | chr4:16574899-16576584 REVERSEhighly similar to ( 565)PUR1_SOYBN affx|C37_08604;	-1.30629
23.1.2.30	nucleotide metabolism.synthesis.purine.IMP dehydrogenase	cit.13288.1.s1_s_at;	highly similar to ( 556)AT1G16350| Symbols: | inosine-5'-monophosphate dehydrogenase, putative | chr1:5590945-5592866 FORWARD affx|C37_17607;	1.44317
23.3	nucleotide metabolism.salvage	cit.20034.1.s1_at;	weakly similar to ( 127)AT1G72040| Symbols: | deoxynucleoside kinase family | chr1:27115821-27117910 REVERSE affx|C37_29275;	-1.33245
23.3.1.3	nucleotide metabolism.salvage.phosphoribosyltransferases.upp	cit.4878.1.s1_s_at;	moderately similar to ( 316)AT4G26510| Symbols: | uracil phosphoribosyltransferase / UMP pyrophosphorylase (UPT1) | chr4:13384813-13387927 FORWARD affx|C37_06177;	1.21587
23.3.1.3	nucleotide metabolism.salvage.phosphoribosyltransferases.upp	cit.13725.1.s1_s_at;	highly similar to ( 805)AT5G40870| Symbols: ATUK/UPRT1 | ATUK/UPRT1 (URIDINE KINASE/URACIL PHOSPHORIBOSYLTRANSFERASE 1); ATP binding / kinase/ uracil phosphoribosyltransferase/ uridine kinase | chr5:16392249-16395612 FORWARD affx|C37_18162;	1.28693
23.3.2.2	nucleotide metabolism.salvage.nucleoside kinases.uridine kinase	cit.13276.1.s1_at;	very weakly similar to ( 100)AT1G03030| Symbols: | phosphoribulokinase/uridine kinase family protein | chr1:701621-703568 FORWARD affx|C37_17589;	-1.39054
23.3.2.2	nucleotide metabolism.salvage.nucleoside kinases.uridine kinase	cit.13278.1.s1_s_at;	moderately similar to ( 289)AT1G03030| Symbols: | phosphoribulokinase/uridine kinase family protein | chr1:701621-703568 FORWARD affx|C37_17591;	-1.28107
23.3.2.3	nucleotide metabolism.salvage.nucleoside kinases.thymidine kinase	cit.29032.1.s1_at;	moderately similar to ( 284)AT5G23070| Symbols: | thymidine kinase, putative | chr5:7741982-7742830 FORWARDmoderately similar to ( 299)KITH_ORYSA affx|C37_42241;	-1.26632
23.4.1	nucleotide metabolism.phosphotransfer and pyrophosphatases.adenylate kinase	cit.12272.1.s1_s_at;	moderately similar to ( 413)AT5G63400| Symbols: ADK1 | ADK1 (ADENYLATE KINASE 1); adenylate kinase | chr5:25410728-25412043 REVERSEmoderately similar to ( 454)KAD2_ORYSA affx|C37_16345;	1.20142
23.4.1	nucleotide metabolism.phosphotransfer and pyrophosphatases.adenylate kinase	cit.13708.1.s1_at;	moderately similar to ( 399)AT5G63400| Symbols: ADK1 | ADK1 (ADENYLATE KINASE 1); adenylate kinase | chr5:25410728-25412043 REVERSEmoderately similar to ( 435)KAD2_ORYSA affx|C37_18139;	1.61165
23.4.1	nucleotide metabolism.phosphotransfer and pyrophosphatases.adenylate kinase	cit.37219.1.s1_at;	moderately similar to ( 288)AT5G35170| Symbols: | adenylate kinase family protein | chr5:13436508-13440611 FORWARD affx|C37_43089;	-1.8674
23.4.1	nucleotide metabolism.phosphotransfer and pyrophosphatases.adenylate kinase	cit.13708.1.s1_s_at;	moderately similar to ( 399)AT5G63400| Symbols: ADK1 | ADK1 (ADENYLATE KINASE 1); adenylate kinase | chr5:25410728-25412043 REVERSEmoderately similar to ( 435)KAD2_ORYSA affx|C37_18139;	1.78679
23.4.2	nucleotide metabolism.phosphotransfer and pyrophosphatases.guanylate kinase	cit.3096.1.s1_s_at;	moderately similar to ( 380)AT3G57550| Symbols: GK-2, AGK2 | AGK2 (GUANYLATE KINASE-ENCODING GENE 1) | chr3:21318246-21320170 FORWARD affx|C37_03915;	1.41421
23.4.3	nucleotide metabolism.phosphotransfer and pyrophosphatases.uridylate kinase	cit.3591.1.s1_at;	weakly similar to ( 141)AT3G10030| Symbols: | aspartate/glutamate/uridylate kinase family protein | chr3:3092623-3094836 REVERSE affx|C37_04532;	-1.9077
23.4.3	nucleotide metabolism.phosphotransfer and pyrophosphatases.uridylate kinase	cit.17158.1.s1_s_at;	moderately similar to ( 229)AT3G10030| Symbols: | aspartate/glutamate/uridylate kinase family protein | chr3:3092623-3094836 REVERSE affx|C37_04533;	-1.24776
23.4.10	nucleotide metabolism.phosphotransfer and pyrophosphatases.nucleoside diphosphate kinase	cit.7681.1.s1_at;	weakly similar to ( 200)AT4G09320| Symbols: NDPK1 | NDPK1 (nucleoside diphosphate kinase 1); ATP binding / nucleoside diphosphate kinase | chr4:5923421-5924363 FORWARDmoderately similar to ( 209)NDK1_TOBAC affx|C37_10467;	1.32765
23.4.10	nucleotide metabolism.phosphotransfer and pyrophosphatases.nucleoside diphosphate kinase	cit.37871.1.s1_s_at;	very weakly similar to (85.9)AT4G09320| Symbols: NDPK1 | NDPK1 (nucleoside diphosphate kinase 1); ATP binding / nucleoside diphosphate kinase | chr4:5923421-5924363 FORWARDvery weakly similar to (89.0)NDK1_SOYBN affx|C37_43790;	1.22239
23.4.10	nucleotide metabolism.phosphotransfer and pyrophosphatases.nucleoside diphosphate kinase	cit.11204.1.s1_s_at;	moderately similar to ( 294)AT5G63310| Symbols: NDPK1A, NDPK IA IA, NDPK IA, NDPK2 | NDPK2 (NUCLEOSIDE DIPHOSPHATE KINASE 2); ATP binding / nucleoside diphosphate kinase | chr5:25389348-25391064 REVERSEmoderately similar to ( 300)NDK2_SPIOL affx|C37_14998;	-1.33575
23.5.3	nucleotide metabolism.deoxynucleotide metabolism.cytosine deaminase	cit.4612.1.s1_at;	moderately similar to ( 314)AT3G47390| Symbols: | cytidine/deoxycytidylate deaminase family protein | chr3:17473079-17475640 FORWARD affx|C37_05846;	-1.43241
23.5.3	nucleotide metabolism.deoxynucleotide metabolism.cytosine deaminase	cit.24611.1.s1_at;	weakly similar to ( 137)AT5G24670| Symbols: | hydrolase/ zinc ion binding | chr5:8448883-8451049 FORWARD affx|C37_41957;	-1.37155
23.5.4	nucleotide metabolism.deoxynucleotide metabolism.ribonucleoside-diphosphate reductase	cit.25576.1.s1_s_at;	moderately similar to ( 290)AT3G23580| Symbols: RNR2, RNR2A | RNR2/RNR2A (RIBONUCLEOTIDE REDUCTASE 2A); ribonucleoside-diphosphate reductase | chr3:8460268-8462581 FORWARDmoderately similar to ( 270)RIR2_TOBAC affx|C37_30965;	-1.52604
23.2	nucleotide metabolism.degradation	cit.30980.1.s1_s_at;	moderately similar to ( 309)AT1G05620| Symbols: | inosine-uridine preferring nucleoside hydrolase family protein | chr1:1679608-1681526 FORWARD affx|C37_19832;	1.5373
23.2	nucleotide metabolism.degradation	cit.17487.1.s1_at;	moderately similar to ( 338)AT2G19570| Symbols: AT-CDA1, DESZ, CDA1 | CDA1 (CYTIDINE DEAMINASE 1) | chr2:8477680-8478585 REVERSE affx|C37_09504;	2.35521
23.2	nucleotide metabolism.degradation	cit.23900.1.s1_at;	weakly similar to ( 112)AT2G02970| Symbols: | nucleoside phosphatase family protein / GDA1/CD39 family protein | chr2:865394-868006 REVERSE affx|C37_39634;	1.32425
23.2	nucleotide metabolism.degradation	cit.3796.1.s1_at;	moderately similar to ( 488)AT2G38280| Symbols: ATAMPD, FAC1 | FAC1 (EMBRYONIC FACTOR1); AMP deaminase | chr2:16040845-16045871 REVERSEmoderately similar to ( 478)AMPD_ORYSA affx|C37_04811;	-1.5315
23.2	nucleotide metabolism.degradation	cit.15671.1.s1_at;	weakly similar to ( 134)AT4G04880| Symbols: | adenosine/AMP deaminase family protein | chr4:2465053-2467101 REVERSE affx|C37_20991;	-1.24284
23.2	nucleotide metabolism.degradation	cit.7130.1.s1_at;	moderately similar to ( 282)AT2G38280| Symbols: ATAMPD, FAC1 | FAC1 (EMBRYONIC FACTOR1); AMP deaminase | chr2:16040845-16045871 REVERSEmoderately similar to ( 282)AMPD_ORYSA affx|C37_09581;	-1.75157
23.2	nucleotide metabolism.degradation	cit.3797.1.s1_s_at;	moderately similar to ( 271)AT2G38280| Symbols: ATAMPD, FAC1 | FAC1 (EMBRYONIC FACTOR1); AMP deaminase | chr2:16040845-16045871 REVERSEmoderately similar to ( 262)AMPD_ORYSA affx|C37_04812;	-1.44695
23.2	nucleotide metabolism.degradation	cit.34899.1.s1_s_at;	very weakly similar to (92.4)AT2G26230| Symbols: | uricase / urate oxidase / nodulin 35, putative | chr2:11172034-11174046 FORWARDweakly similar to ( 101)URIC_PHAVU affx|C37_27722;	1.52036
23.2	nucleotide metabolism.degradation	cit.13680.1.s1_at;	moderately similar to ( 426)AT5G54390| Symbols: ATAHL, AHL | AHL (HAL2-LIKE); 3'(2'),5'-bisphosphate nucleotidase/ inositol or phosphatidylinositol phosphatase | chr5:22103359-22104812 FORWARDweakly similar to ( 200)DPNP_ORYSA affx|C37_18099;	1.47411
23.2	nucleotide metabolism.degradation	cit.14944.1.s1_at;	highly similar to ( 501)AT1G05620| Symbols: | inosine-uridine preferring nucleoside hydrolase family protein | chr1:1679608-1681526 FORWARD affx|C37_19833;	1.67487
13.2.6.2	amino acid metabolism.degradation.aromatic aa.tyrosine	cit.14020.1.s1_at;	highly similar to ( 575)AT5G53970| Symbols: | aminotransferase, putative | chr5:21927902-21929820 FORWARD affx|C37_18566;	-1.97194
13.2.6.3	amino acid metabolism.degradation.aromatic aa.tryptophan	cit.8884.1.s1_s_at;	highly similar to ( 559)AT1G06550| Symbols: | enoyl-CoA hydratase/isomerase family protein | chr1:2003833-2006563 REVERSE affx|C37_12144;	-1.42454
13.2.5.2	amino acid metabolism.degradation.serine-glycine-cysteine group.glycine	cit.3380.1.s1_at;	highly similar to ( 678)AT1G68010| Symbols: HPR | HPR (HYDROXYPYRUVATE REDUCTASE); glycerate dehydrogenase/ poly(U) binding | chr1:25497081-25499383 FORWARDhighly similar to ( 678)DHGY_CUCSA affx|C37_04277;	-2.23151
13.2.5.2	amino acid metabolism.degradation.serine-glycine-cysteine group.glycine	cit.28041.1.s1_s_at;	moderately similar to ( 298)AT1G68010| Symbols: HPR | HPR (HYDROXYPYRUVATE REDUCTASE); glycerate dehydrogenase/ poly(U) binding | chr1:25497081-25499383 FORWARDmoderately similar to ( 285)DHGY_CUCSA affx|C37_37718;	-1.97564
13.2.5.2	amino acid metabolism.degradation.serine-glycine-cysteine group.glycine	cit.10442.1.s1_s_at;	moderately similar to ( 360)AT4G33010| Symbols: ATGLDP1 | ATGLDP1 (ARABIDOPSIS THALIANA GLYCINE DECARBOXYLASE P-PROTEIN 1) | chr4:15927136-15931153 REVERSEmoderately similar to ( 362)GCSP_SOLTU affx|C37_14058;	-1.46472
13.2.5.2	amino acid metabolism.degradation.serine-glycine-cysteine group.glycine	cit.10146.1.s1_s_at;	highly similar to ( 728)AT1G11860| Symbols: | aminomethyltransferase, putative | chr1:4001800-4003244 FORWARDhighly similar to ( 724)GCST_SOLTU affx|C37_13681;	-1.46037
13.2.5.2	amino acid metabolism.degradation.serine-glycine-cysteine group.glycine	cit.2725.1.s1_s_at;	highly similar to ( 511)AT1G08630| Symbols: THA1 | THA1 (THREONINE ALDOLASE 1) | chr1:2743951-2745688 REVERSE affx|C37_03445;	-2.22346
13.2.4.1	amino acid metabolism.degradation.branched-chain group.shared	cit.31975.1.s1_s_at;	weakly similar to ( 174)AT5G09300| Symbols: | 2-oxoisovalerate dehydrogenase, putative / 3-methyl-2-oxobutanoate dehydrogenase, putative / branched-chain alpha-keto acid dehydrogenase E1 alpha subunit, putative | chr5:2884283-2886292 REVERSE affx|C37_23516;	-1.7956
13.2.4.1	amino acid metabolism.degradation.branched-chain group.shared	cit.8173.1.s1_s_at;	moderately similar to ( 335)AT2G33150| Symbols: PED1, KAT2 | KAT2/PED1 (PEROXISOME DEFECTIVE 1); acetyl-CoA C-acyltransferase | chr2:14054891-14058060 REVERSE affx|C37_11211;	1.17919
13.2.4.1	amino acid metabolism.degradation.branched-chain group.shared	cit.25712.1.s1_s_at;	very weakly similar to (87.4)AT2G33150| Symbols: PED1, KAT2 | KAT2/PED1 (PEROXISOME DEFECTIVE 1); acetyl-CoA C-acyltransferase | chr2:14054891-14058060 REVERSE affx|C37_31335;	1.19823
13.2.3.1.1	amino acid metabolism.degradation.aspartate family.asparagine.L-asparaginase	cit.15481.1.s1_at;	moderately similar to ( 355)AT5G08100| Symbols: | L-asparaginase / L-asparagine amidohydrolase | chr5:2593243-2594587 REVERSEmoderately similar to ( 355)ASPG_LUPLU affx|C37_20685;	-1.23052
13.2.3.1.1	amino acid metabolism.degradation.aspartate family.asparagine.L-asparaginase	cit.20144.1.s1_s_at;	very weakly similar to (85.5)AT3G16150| Symbols: | L-asparaginase, putative / L-asparagine amidohydrolase, putative | chr3:5471800-5473039 FORWARD affx|C37_32188;	-2.93332
13.2.3.4	amino acid metabolism.degradation.aspartate family.methionine	cit.97.1.s1_s_at;	highly similar to ( 864)AT4G13940| Symbols: EMB1395, MEE58, SAHH, SAHH1, HOG1 | HOG1 (HOMOLOGY-DEPENDENT GENE SILENCING 1) | chr4:8054926-8056758 FORWARDhighly similar to ( 862)SAHH_CATRO affx|C37_00096;	1.35931
13.2.3.5	amino acid metabolism.degradation.aspartate family.lysine	cit.13613.1.s1_at;	moderately similar to ( 370)AT2G28305| Symbols: | similar to unknown protein [Arabidopsis thaliana] (TAIR:AT2G37210.1); similar to unnamed protein product [Vitis vinifera] (GB:CAO21862.1); contains InterPro domain Conserved hypothetical protein CHP00730 (InterPro:IPR005269) | chr2:12088263-12091384 FORWARD affx|C37_18014;	4.30601
13.2.3.5	amino acid metabolism.degradation.aspartate family.lysine	cit.31139.1.s1_at;	moderately similar to ( 328)AT5G11950| Symbols: | Encodes a protein of unknown function. It has been crystallized and shown to be structurally almost identical to the protein encoded by At2G37210. | chr5:3855073-3856816 FORWARD affx|C37_20962;	-1.5991
13.2.3.5	amino acid metabolism.degradation.aspartate family.lysine	cit.30479.1.s1_x_at;	weakly similar to ( 136)AT4G35190| Symbols: | similar to unknown protein [Arabidopsis thaliana] (TAIR:AT2G37210.1); similar to unnamed protein product [Vitis vinifera] (GB:CAO47480.1); contains InterPro domain Conserved hypothetical protein CHP00730 (InterPro:IPR005269) | chr4:16746729-16748095 FORWARD affx|C37_12011;	-1.46036
13.2.3.5	amino acid metabolism.degradation.aspartate family.lysine	cit.12094.1.s1_at;	moderately similar to ( 240)AT4G33150| Symbols: LKR/SDH, LKR, SDH | LKR (SACCHAROPINE DEHYDROGENASE) | chr4:15985482-15991072 REVERSE affx|C37_16111;	1.83161
13.2.3.5	amino acid metabolism.degradation.aspartate family.lysine	cit.15734.1.s1_at;	moderately similar to ( 254)AT4G33150| Symbols: LKR/SDH, LKR, SDH | LKR (SACCHAROPINE DEHYDROGENASE) | chr4:15985482-15991072 REVERSE affx|C37_21079;	1.31588
13.2.3.5	amino acid metabolism.degradation.aspartate family.lysine	cit.6666.1.s1_at;	moderately similar to ( 265)AT4G33150| Symbols: LKR/SDH, LKR, SDH | LKR (SACCHAROPINE DEHYDROGENASE) | chr4:15985482-15991072 REVERSE affx|C37_08746;	-1.52199
13.2.2.2	amino acid metabolism.degradation.glutamate family.proline	cit.26201.1.s1_at;	moderately similar to ( 284)AT5G38710| Symbols: | proline oxidase, putative / osmotic stress-responsive proline dehydrogenase, putative | chr5:15518570-15521129 FORWARD affx|C37_32812;	1.99386
13.2.2.3	amino acid metabolism.degradation.glutamate family.arginine	cit.3728.1.s1_at;	highly similar to ( 607)AT4G08900| Symbols: | arginase | chr4:5703496-5705177 FORWARDhighly similar to ( 510)ARGI_SOYBN affx|C37_04710;	1.17789
13.2.1.2	amino acid metabolism.degradation.central amino acid metabolism.aspartate	cit.26163.1.s1_at;	moderately similar to ( 288)AT5G14760| Symbols: AO | AO (L-ASPARTATE OXIDASE); L-aspartate oxidase | chr5:4769136-4772015 FORWARD affx|C37_32690;	-2.4587
13.1.1.3.1	amino acid metabolism.synthesis.central amino acid metabolism.alanine.alanine aminotransferase	cit.10741.1.s1_s_at;	highly similar to ( 888)AT1G70580| Symbols: GGT2, AOAT2 | AOAT2 (GLUTAMATE:GLYOXYLATE AMINOTRANSFERASE 2); alanine transaminase | chr1:26616885-26619508 FORWARDmoderately similar to ( 488)ALA2_HORVU affx|C37_14425;	-1.75437
13.1.1.3.11	amino acid metabolism.synthesis.central amino acid metabolism.alanine.alanine-glyoxylate aminotransferase	cit.2346.1.s1_at;	highly similar to ( 726)AT2G13360| Symbols: AGT1, AGT | AGT (ALANINE:GLYOXYLATE AMINOTRANSFERASE) | chr2:5546499-5547984 REVERSEweakly similar to ( 101)SGAT_MAIZE affx|C37_02954;	-2.3119
13.1.1.3.11	amino acid metabolism.synthesis.central amino acid metabolism.alanine.alanine-glyoxylate aminotransferase	cit.2345.1.s1_s_at;	moderately similar to ( 328)AT2G13360| Symbols: AGT1, AGT | AGT (ALANINE:GLYOXYLATE AMINOTRANSFERASE) | chr2:5546499-5547984 REVERSE affx|C37_02953;	-2.57491
13.1.1.3.11	amino acid metabolism.synthesis.central amino acid metabolism.alanine.alanine-glyoxylate aminotransferase	cit.12141.1.s1_s_at;	highly similar to ( 764)AT3G08860| Symbols: | alanine--glyoxylate aminotransferase, putative / beta-alanine-pyruvate aminotransferase, putative / AGT, putative | chr3:2696760-2699093 REVERSEvery weakly similar to (94.4)GSA_ORYSA affx|C37_16168;	3.50276
13.1.1.3.11	amino acid metabolism.synthesis.central amino acid metabolism.alanine.alanine-glyoxylate aminotransferase	cit.12140.1.s1_at;	moderately similar to ( 354)AT3G08860| Symbols: | alanine--glyoxylate aminotransferase, putative / beta-alanine-pyruvate aminotransferase, putative / AGT, putative | chr3:2696760-2699093 REVERSE affx|C37_16167;	2.87541
13.1.1.2.1	amino acid metabolism.synthesis.central amino acid metabolism.aspartate.aspartate aminotransferase	cit.3594.1.s1_at;	highly similar to ( 764)AT4G31990| Symbols: AAT3, ATAAT1 | ASP5 (ASPARTATE AMINOTRANSFERASE 5) | chr4:15470882-15473527 REVERSEmoderately similar to ( 456)AATC_ORYSA affx|C37_04538;	-1.24631
13.1.1.2.1	amino acid metabolism.synthesis.central amino acid metabolism.aspartate.aspartate aminotransferase	cit.30349.1.s1_at;	weakly similar to ( 118)AT4G31990| Symbols: AAT3, ATAAT1 | ASP5 (ASPARTATE AMINOTRANSFERASE 5) | chr4:15470882-15473527 REVERSEweakly similar to ( 166)AATC_DAUCA affx|C37_10591;	-2.30865
13.1.1.2.1	amino acid metabolism.synthesis.central amino acid metabolism.aspartate.aspartate aminotransferase	cit.30349.1.s1_s_at;	weakly similar to ( 118)AT4G31990| Symbols: AAT3, ATAAT1 | ASP5 (ASPARTATE AMINOTRANSFERASE 5) | chr4:15470882-15473527 REVERSEweakly similar to ( 166)AATC_DAUCA affx|C37_10591;	-2.07973
13.1.1.2.1	amino acid metabolism.synthesis.central amino acid metabolism.aspartate.aspartate aminotransferase	cit.4357.1.s1_s_at;	highly similar to ( 730)AT2G30970| Symbols: ASP1 | ASP1 (ASPARTATE AMINOTRANSFERASE 1) | chr2:13186089-13188763 FORWARDmoderately similar to ( 408)AATC_ORYSA affx|C37_05533;	1.26869
13.1.1.2.1	amino acid metabolism.synthesis.central amino acid metabolism.aspartate.aspartate aminotransferase	cit.11188.1.s1_s_at;	highly similar to ( 714)AT5G11520| Symbols: YLS4, ASP3 | ASP3 (ASPARTATE AMINOTRANSFERASE 3) | chr5:3685258-3687722 REVERSEhighly similar to ( 719)AATC_DAUCA affx|C37_14978;	1.49878
13.1.1.1.2	amino acid metabolism.synthesis.central amino acid metabolism.GABA.GABA transaminase	cit.2579.1.s1_s_at;	highly similar to ( 807)AT3G22200| Symbols: HER1, POP2, GABA-T | POP2 (POLLEN-PISTIL INCOMPATIBILITY 2); 4-aminobutyrate transaminase | chr3:7835293-7838870 FORWARDvery weakly similar to (84.3)GSA_HORVU affx|C37_03263;	1.2176
13.1.6.1.5	amino acid metabolism.synthesis.aromatic aa.chorismate.shikimate kinase	cit.32908.1.s1_at;	moderately similar to ( 242)AT3G26900| Symbols: | shikimate kinase family protein | chr3:9913551-9915661 REVERSE affx|C37_24678;	-1.62074
13.1.6.1.10	amino acid metabolism.synthesis.aromatic aa.chorismate.dehydroquinate/shikimate dehydrogenase	cit.25466.1.s1_at;	weakly similar to ( 194)AT3G06350| Symbols: EMB3004, MEE32 | EMB3004/MEE32 (EMBRYO DEFECTIVE 3004); 3-dehydroquinate dehydratase/ NADP binding / binding / catalytic/ shikimate 5-dehydrogenase | chr3:1924542-1927707 REVERSE affx|C37_30607;	2.2602
13.1.6.2	amino acid metabolism.synthesis.aromatic aa.phenylalanine and tyrosine	cit.12663.1.s1_s_at;	moderately similar to ( 290)AT1G80360| Symbols: | aminotransferase class I and II family protein | chr1:30213628-30215535 REVERSE affx|C37_16833;	1.29189
13.1.6.2.1	amino acid metabolism.synthesis.aromatic aa.phenylalanine and tyrosine.chorismate mutase	cit.17342.1.s1_at;	moderately similar to ( 217)AT5G10870| Symbols: ATCM2 | ATCM2 (CHORISMATE MUTASE 2); chorismate mutase | chr5:3430692-3432273 REVERSE affx|C37_07909;	1.87584
13.1.6.2.1	amino acid metabolism.synthesis.aromatic aa.phenylalanine and tyrosine.chorismate mutase	cit.31487.1.s1_s_at;	moderately similar to ( 389)AT3G29200| Symbols: ATCM1, CM1 | CM1 (chorismate mutase 1); chorismate mutase | chr3:11165819-11167495 REVERSE affx|C37_22597;	-1.20489
13.1.6.2.1	amino acid metabolism.synthesis.aromatic aa.phenylalanine and tyrosine.chorismate mutase	cit.31487.1.s1_at;	moderately similar to ( 389)AT3G29200| Symbols: ATCM1, CM1 | CM1 (chorismate mutase 1); chorismate mutase | chr3:11165819-11167495 REVERSE affx|C37_22597;	-1.44004
13.1.5.1.1	amino acid metabolism.synthesis.serine-glycine-cysteine group.serine.phosphoglycerate dehydrogenase	cit.1676.1.s1_s_at;	moderately similar to ( 282)AT3G19480| Symbols: | D-3-phosphoglycerate dehydrogenase, putative / 3-PGDH, putative | chr3:6752596-6754656 FORWARD affx|C37_02118;	1.57202
13.1.5.1.1	amino acid metabolism.synthesis.serine-glycine-cysteine group.serine.phosphoglycerate dehydrogenase	cit.22376.1.s1_s_at;	moderately similar to ( 207)AT4G34200| Symbols: EDA9 | EDA9 (embryo sac development arrest 9); NAD binding / amino acid binding / binding / catalytic/ cofactor binding / oxidoreductase, acting on the CH-OH group of donors, NAD or NADP as acceptor / phosphoglycerate dehydrogenase | chr4:16374045-16376565 REVERSE affx|C37_31479;	1.70816
13.1.5.2	amino acid metabolism.synthesis.serine-glycine-cysteine group.glycine	cit.10148.1.s1_s_at;	moderately similar to ( 355)AT4G37930| Symbols: STM, SHMT1, SHM1 | SHM1 (SERINE HYDROXYMETHYLTRANSFERASE 1); glycine hydroxymethyltransferase/ poly(U) binding | chr4:17831885-17834736 REVERSEmoderately similar to ( 377)GLYN_FLAPR affx|C37_13684;	-1.87588
13.1.5.2.41	amino acid metabolism.synthesis.serine-glycine-cysteine group.glycine.sarcosine oxidase	cit.3794.1.s1_at;	moderately similar to ( 276)AT2G24580| Symbols: | sarcosine oxidase family protein | chr2:10452007-10453257 REVERSE affx|C37_04808;	-1.39237
13.1.5.3	amino acid metabolism.synthesis.serine-glycine-cysteine group.cysteine	cit.2912.1.s1_at;	weakly similar to ( 178)AT5G15120| Symbols: | similar to unknown protein [Arabidopsis thaliana] (TAIR:AT5G39890.1); similar to unnamed protein product [Vitis vinifera] (GB:CAO14912.1); contains InterPro domain Protein of unknown function DUF1637 (InterPro:IPR012864) | chr5:4898817-4900354 FORWARD affx|C37_03681;	2.27516
13.1.5.3	amino acid metabolism.synthesis.serine-glycine-cysteine group.cysteine	cit.14133.1.s1_s_at;	weakly similar to ( 160)AT5G15120| Symbols: | similar to unknown protein [Arabidopsis thaliana] (TAIR:AT5G39890.1); similar to unnamed protein product [Vitis vinifera] (GB:CAO14912.1); contains InterPro domain Protein of unknown function DUF1637 (InterPro:IPR012864) | chr5:4898817-4900354 FORWARD affx|C37_18712;	3.64166
13.1.5.3	amino acid metabolism.synthesis.serine-glycine-cysteine group.cysteine	cit.14133.1.s1_at;	weakly similar to ( 160)AT5G15120| Symbols: | similar to unknown protein [Arabidopsis thaliana] (TAIR:AT5G39890.1); similar to unnamed protein product [Vitis vinifera] (GB:CAO14912.1); contains InterPro domain Protein of unknown function DUF1637 (InterPro:IPR012864) | chr5:4898817-4900354 FORWARD affx|C37_18712;	3.07139
13.1.5.3	amino acid metabolism.synthesis.serine-glycine-cysteine group.cysteine	cit.31048.1.s1_s_at;	moderately similar to ( 335)AT1G18490| Symbols: | similar to unknown protein [Arabidopsis thaliana] (TAIR:AT5G39890.1); similar to Putative Expressed protein [Brassica oleracea] (GB:AAW81740.1); contains InterPro domain Protein of unknown function DUF1637 (InterPro:IPR012864) | chr1:6367109-6368633 FORWARD affx|C37_20328;	-1.25397
13.1.5.3	amino acid metabolism.synthesis.serine-glycine-cysteine group.cysteine	cit.14134.1.s1_at;	moderately similar to ( 231)AT5G15120| Symbols: | similar to unknown protein [Arabidopsis thaliana] (TAIR:AT5G39890.1); similar to unnamed protein product [Vitis vinifera] (GB:CAO14912.1); contains InterPro domain Protein of unknown function DUF1637 (InterPro:IPR012864) | chr5:4898817-4900354 FORWARD affx|C37_18713;	3.47763
13.1.5.3	amino acid metabolism.synthesis.serine-glycine-cysteine group.cysteine	cit.2912.1.s1_s_at;	weakly similar to ( 178)AT5G15120| Symbols: | similar to unknown protein [Arabidopsis thaliana] (TAIR:AT5G39890.1); similar to unnamed protein product [Vitis vinifera] (GB:CAO14912.1); contains InterPro domain Protein of unknown function DUF1637 (InterPro:IPR012864) | chr5:4898817-4900354 FORWARD affx|C37_03681;	2.13196
13.1.5.3	amino acid metabolism.synthesis.serine-glycine-cysteine group.cysteine	cit.2911.1.s1_at;	weakly similar to ( 176)AT5G15120| Symbols: | similar to unknown protein [Arabidopsis thaliana] (TAIR:AT5G39890.1); similar to unnamed protein product [Vitis vinifera] (GB:CAO14912.1); contains InterPro domain Protein of unknown function DUF1637 (InterPro:IPR012864) | chr5:4898817-4900354 FORWARD affx|C37_03680;	2.13958
13.1.4.1	amino acid metabolism.synthesis.branched chain group.common	cit.10101.1.s1_at;	moderately similar to ( 214)AT3G48560| Symbols: ALS, AHAS, TZP5, IMR1, CSR1 | CSR1 (CHLORSULFURON/IMIDAZOLINONE RESISTANT 1) | chr3:18012515-18014527 REVERSEmoderately similar to ( 220)ILV2_TOBAC affx|C37_13629;	1.29458
13.1.3.1	amino acid metabolism.synthesis.aspartate family.asparagine	cit.10058.1.s1_s_at;	moderately similar to ( 338)AT3G47340| Symbols: DIN6, AT-ASN1, ASN1 | ASN1 (DARK INDUCIBLE 6) | chr3:17449430-17452028 REVERSEmoderately similar to ( 334)ASNS1_LOTJA affx|C37_13577;	3.82145
13.1.3.1	amino acid metabolism.synthesis.aspartate family.asparagine	cit.10060.1.s1_at;	nearly identical (1010)AT3G47340| Symbols: DIN6, AT-ASN1, ASN1 | ASN1 (DARK INDUCIBLE 6) | chr3:17449430-17452028 REVERSEnearly identical (1003)ASNS_ASPOF affx|C37_13579;	2.8028
13.1.3.1	amino acid metabolism.synthesis.aspartate family.asparagine	cit.10060.1.s1_s_at;	nearly identical (1010)AT3G47340| Symbols: DIN6, AT-ASN1, ASN1 | ASN1 (DARK INDUCIBLE 6) | chr3:17449430-17452028 REVERSEnearly identical (1003)ASNS_ASPOF affx|C37_13579;	2.61243
13.1.3.1.1	amino acid metabolism.synthesis.aspartate family.asparagine.asparagine synthetase	cit.28260.1.s1_at;	moderately similar to ( 252)AT2G03667| Symbols: | asparagine synthase (glutamine-hydrolyzing) | chr2:1114176-1117278 FORWARD affx|C37_38458;	-1.25758
13.1.3.4	amino acid metabolism.synthesis.aspartate family.methionine	cit.22577.1.s1_at;	weakly similar to ( 119)AT5G17920| Symbols: ATMETS, ATMS1, ATCIMS | ATCIMS (COBALAMIN-INDEPENDENT METHIONINE SYNTHASE) | chr5:5935773-5939197 FORWARDweakly similar to ( 120)METE_CATRO affx|C37_32329;	1.51322
13.1.3.4	amino acid metabolism.synthesis.aspartate family.methionine	cit.675.1.s1_x_at;	moderately similar to ( 486)AT5G17920| Symbols: ATMETS, ATMS1, ATCIMS | ATCIMS (COBALAMIN-INDEPENDENT METHIONINE SYNTHASE) | chr5:5935773-5939197 FORWARDmoderately similar to ( 476)METE_CATRO affx|C37_00820;	1.38791
13.1.3.4	amino acid metabolism.synthesis.aspartate family.methionine	cit.15847.1.s1_at;	weakly similar to ( 122)AT5G49810| Symbols: MMT | MMT (methionine S-methyltransferase); S-adenosylmethionine-dependent methyltransferase | chr5:20256644-20263272 FORWARDweakly similar to ( 120)MMT1_HORVU affx|C37_21255;	-1.8528
13.1.3.4	amino acid metabolism.synthesis.aspartate family.methionine	cit.10873.1.s1_s_at;	moderately similar to ( 493)AT3G22740| Symbols: HMT3 | HMT3 (Homocysteine S-methyltransferase 3); homocysteine S-methyltransferase | chr3:8033207-8035717 REVERSEmoderately similar to ( 433)HMT2_MAIZE affx|C37_14586;	1.99227
13.1.3.4	amino acid metabolism.synthesis.aspartate family.methionine	cit.22939.1.s1_s_at;	weakly similar to ( 174)AT3G03780| Symbols: AtMS2 | AtMS2 (Arabidopsis thaliana methionine synthase 2) | chr3:957609-960747 FORWARDweakly similar to ( 172)METE_MESCR affx|C37_34062;	1.38047
13.1.3.4	amino acid metabolism.synthesis.aspartate family.methionine	cit.24856.1.s1_s_at;	moderately similar to ( 248)AT1G67430| Symbols: | 60S ribosomal protein L17 (RPL17B) | chr1:25265872-25267290 FORWARDmoderately similar to ( 242)RL171_HORVU affx|C37_42744;	1.22266
13.1.3.5.5	amino acid metabolism.synthesis.aspartate family.lysine.diaminopimelate decarboxylase	cit.2423.1.s1_at;	highly similar to ( 789)AT5G11880| Symbols: | diaminopimelate decarboxylase, putative / DAP carboxylase, putative | chr5:3827807-3829943 REVERSE affx|C37_03059;	1.20549
13.1.3.6.1.1	amino acid metabolism.synthesis.aspartate family.misc.homoserine.aspartate kinase	cit.13786.1.s1_s_at;	moderately similar to ( 293)AT1G31230| Symbols: AK-HSDH I, AK-HSDH | AK-HSDH/AK-HSDH I (ASPARTATE KINASE-HOMOSERINE DEHYDROGENASE I); aspartate kinase/ homoserine dehydrogenase | chr1:11158725-11163036 REVERSEmoderately similar to ( 282)AKH2_MAIZE affx|C37_18245;	-1.29117
13.1.2.2	amino acid metabolism.synthesis.glutamate family.proline	cit.30527.1.s1_s_at;	moderately similar to ( 249)AT3G55610| Symbols: P5CS2 | P5CS2 (DELTA 1-PYRROLINE-5-CARBOXYLATE SYNTHASE 2); catalytic/ glutamate 5-kinase/ oxidoreductase | chr3:20635984-20639968 REVERSEmoderately similar to ( 248)P5CS_ACTCH affx|C37_12997;	-1.41411
13.1.2.2	amino acid metabolism.synthesis.glutamate family.proline	cit.25104.1.s1_at;	weakly similar to ( 128)AT2G39800| Symbols: ATP5CS, P5CS1 | P5CS1 (DELTA1-PYRROLINE-5-CARBOXYLATE SYNTHASE 1) | chr2:16605594-16610017 REVERSEweakly similar to ( 127)P5CS_ORYSA affx|C37_27135;	-1.42992
13.1.2.3.4	amino acid metabolism.synthesis.glutamate family.arginine.acetylornithine aminotransferase	cit.8168.1.s1_at;	moderately similar to ( 251)AT1G80600| Symbols: | acetylornithine aminotransferase, mitochondrial, putative / acetylornithine transaminase, putative / AOTA, putative / ACOAT, putative | chr1:30303567-30305405 REVERSEvery weakly similar to (90.5)CYT1_MAIZE affx|C37_11204;	1.64358
13.1.2.3.31	amino acid metabolism.synthesis.glutamate family.arginine.aspartate racemase	cit.35630.1.s1_s_at;	weakly similar to ( 124)AT1G15410| Symbols: | aspartate-glutamate racemase family | chr1:5299572-5300676 FORWARD affx|C37_29104;	1.82462
13.1.2.3.31	amino acid metabolism.synthesis.glutamate family.arginine.aspartate racemase	cit.29946.1.s1_at;	weakly similar to ( 171)AT1G15410| Symbols: | aspartate-glutamate racemase family | chr1:5299572-5300676 FORWARD affx|C37_08579;	2.02573
16.1	secondary metabolism.isoprenoids	cit.36186.1.s1_at;	moderately similar to ( 226)AT2G47780| Symbols: | rubber elongation factor (REF) protein-related | chr2:19577146-19577934 FORWARDweakly similar to ( 196)Y5940_ORYSA affx|C37_33505;	1.44755
16.1	secondary metabolism.isoprenoids	cit.28037.1.s1_at;	weakly similar to ( 173)AT1G60600| Symbols: ABC4 | ABC4 (ABERRANT CHLOROPLAST DEVELOPMENT 4) | chr1:22328472-22330424 REVERSE affx|C37_37704;	-2.25873
16.1	secondary metabolism.isoprenoids	cit.9139.1.s1_s_at;	moderately similar to ( 228)AT1G67360| Symbols: | rubber elongation factor (REF) family protein | chr1:25240735-25241576 REVERSEweakly similar to ( 112)Y5940_ORYSA affx|C37_12451;	-1.69647
16.1.1.2	secondary metabolism.isoprenoids.non-mevalonate pathway.DXR	cit.21732.1.s1_at;	weakly similar to ( 107)AT5G62790| Symbols: PDE129, DXR | DXR (1-DEOXY-D-XYLULOSE 5-PHOSPHATE REDUCTOISOMERASE) | chr5:25231584-25234518 REVERSEweakly similar to ( 103)DXR_ORYSA affx|C37_26881;	-1.71479
16.1.1.3	secondary metabolism.isoprenoids.non-mevalonate pathway.CMS	cit.14478.1.s1_at;	moderately similar to ( 358)AT2G02500| Symbols: ATMEPCT, MCT, ISPD | ISPD (2-C-METHYL-D-ERYTHRITOL 4-PHOSPHATE CYTIDYLTRANSFERASE) | chr2:671053-673123 REVERSE affx|C37_19190;	-1.20679
16.1.1.6	secondary metabolism.isoprenoids.non-mevalonate pathway.HDS	cit.985.1.s1_at;	highly similar to ( 727)AT5G60600| Symbols: ISPG, CSB3, CLB4, GcpE | GcpE (CHLOROPLAST BIOGENESIS 4) | chr5:24376673-24380245 FORWARD affx|C37_01243;	-1.19069
16.1.1.10	secondary metabolism.isoprenoids.non-mevalonate pathway.geranylgeranyl pyrophosphate synthase	cit.14050.1.s1_at;	moderately similar to ( 325)AT4G36810| Symbols: GGPS1 | GGPS1 (GERANYLGERANYL PYROPHOSPHATE SYNTHASE 1); farnesyltranstransferase | chr4:17343517-17344632 FORWARDmoderately similar to ( 332)GGPPS_HEVBR affx|C37_18600;	-2.20522
16.1.2.2	secondary metabolism.isoprenoids.mevalonate pathway.HMG-CoA synthase	cit.29249.1.s1_at;	moderately similar to ( 213)AT4G11820| Symbols: HMGS, EMB2778, MVA1 | MVA1 (HYDROXYMETHYLGLUTARYL-COA SYNTHASE) | chr4:7109118-7111895 REVERSE affx|C37_45720;	-1.27202
16.1.2.4	secondary metabolism.isoprenoids.mevalonate pathway.mevalonate kinase	cit.2723.1.s1_s_at;	moderately similar to ( 422)AT5G27450| Symbols: MVK, MK | MK/MVK; mevalonate kinase | chr5:9691054-9692978 FORWARD affx|C37_03442;	1.51823
16.1.2.9	secondary metabolism.isoprenoids.mevalonate pathway.farnesyl pyrophosphate synthetase	cit.1688.1.s1_s_at;	moderately similar to ( 216)AT4G17190| Symbols: FPS2 | FPS2 (FARNESYL DIPHOSPHATE SYNTHASE 2); dimethylallyltranstransferase/ geranyltranstransferase | chr4:9648754-9650876 REVERSEmoderately similar to ( 207)FPPS_HELAN affx|C37_02134;	1.42467
16.1.3.2	secondary metabolism.isoprenoids.tocopherol biosynthesis.homogentisate phytyltransferase	cit.27202.1.s1_at;	very weakly similar to (85.1)AT2G18950| Symbols: TPT1, ATHPT, HPT, VTE2, HPT1 | HPT1 (HOMOGENTISATE PHYTYLTRANSFERASE 1); prenyltransferase | chr2:8214573-8217129 FORWARD affx|C37_35467;	-1.45624
16.1.3.3	secondary metabolism.isoprenoids.tocopherol biosynthesis.MPBQ/MSBQ methyltransferase	cit.5507.1.s1_at;	highly similar to ( 533)AT3G63410| Symbols: VTE3, APG1 | APG1 (ALBINO OR PALE GREEN MUTANT 1); methyltransferase | chr3:23426791-23427977 REVERSEhighly similar to ( 553)IN37_SPIOL affx|C37_07010;	-1.72406
16.1.3.3	secondary metabolism.isoprenoids.tocopherol biosynthesis.MPBQ/MSBQ methyltransferase	cit.14492.1.s1_at;	moderately similar to ( 360)AT3G63410| Symbols: VTE3, APG1 | APG1 (ALBINO OR PALE GREEN MUTANT 1); methyltransferase | chr3:23426791-23427977 REVERSEmoderately similar to ( 366)IN37_SPIOL affx|C37_19207;	-1.32822
16.1.3.4	secondary metabolism.isoprenoids.tocopherol biosynthesis.tocopherol cyclase	cit.2798.1.s1_at;	highly similar to ( 718)AT4G32770| Symbols: ATSDX1, VTE1 | VTE1 (VITAMIN E DEFICIENT 1) | chr4:15804986-15807795 FORWARDhighly similar to ( 658)TOCC_MAIZE affx|C37_03539;	-1.61605
16.1.3.4	secondary metabolism.isoprenoids.tocopherol biosynthesis.tocopherol cyclase	cit.20866.1.s1_s_at;	weakly similar to ( 130)AT4G32770| Symbols: ATSDX1, VTE1 | VTE1 (VITAMIN E DEFICIENT 1) | chr4:15804986-15807795 FORWARDweakly similar to ( 123)TOCC_MAIZE affx|C37_45489;	-1.7325
16.1.4	secondary metabolism.isoprenoids.carotenoids	cit.2762.1.s1_at;	highly similar to ( 942)AT3G04870| Symbols: PDE181, ZDS | ZDS (ZETA-CAROTENE DESATURASE); carotene 7,8-desaturase | chr3:1342848-1346195 FORWARDhighly similar to ( 971)ZDS_CAPAN affx|C37_03492;	-1.41255
16.1.4	secondary metabolism.isoprenoids.carotenoids	cit.24007.1.s1_s_at;	moderately similar to ( 341)AT5G49555| Symbols: | amine oxidase-related | chr5:20124637-20127828 REVERSE affx|C37_40217;	-1.37654
16.1.4.1	secondary metabolism.isoprenoids.carotenoids.phytoene synthase	cit.22267.1.s1_at;	weakly similar to ( 191)AT5G17230| Symbols: PSY | PSY (PHYTOENE SYNTHASE) | chr5:5659841-5662089 REVERSEweakly similar to ( 182)PSY_DAUCA affx|C37_30895;	-2.52739
16.1.4.1	secondary metabolism.isoprenoids.carotenoids.phytoene synthase	cit.11366.1.s1_at;	highly similar to ( 598)AT5G17230| Symbols: PSY | PSY (PHYTOENE SYNTHASE) | chr5:5659841-5662089 REVERSEhighly similar to ( 608)PSY_CAPAN affx|C37_15202;	-1.45334
16.1.4.5	secondary metabolism.isoprenoids.carotenoids.lycopene beta cyclase	cit.13178.1.s1_s_at;	moderately similar to ( 252)AT3G10230| Symbols: LYC | LYC (LYCOPENE CYCLASE) | chr3:3164345-3165454 REVERSEmoderately similar to ( 368)CCS_CITSI affx|C37_17465;	1.48975
16.1.4.5	secondary metabolism.isoprenoids.carotenoids.lycopene beta cyclase	cit.3491.1.s1_at;	highly similar to ( 769)AT3G10230| Symbols: LYC | LYC (LYCOPENE CYCLASE) | chr3:3164345-3165454 REVERSEhighly similar to ( 806)LCYB_CAPAN affx|C37_04414;	-1.47689
16.1.4.5	secondary metabolism.isoprenoids.carotenoids.lycopene beta cyclase	cit.4187.1.s1_at;	highly similar to ( 708)AT5G57030| Symbols: LUT2 | LUT2 (LUTEIN DEFICIENT 2); lycopene epsilon cyclase | chr5:23094624-23097044 FORWARDmoderately similar to ( 280)LCYB_CAPAN affx|C37_05304;	-1.55081
16.1.4.21	secondary metabolism.isoprenoids.carotenoids.violaxanthin de-epoxidase	cit.13924.1.s1_at;	moderately similar to ( 333)AT1G08550| Symbols: AVDE1 | NPQ1 (NON-PHOTOCHEMICAL QUENCHING 1) | chr1:2707465-2709390 FORWARD affx|C37_18435;	-1.89945
16.1.4.21	secondary metabolism.isoprenoids.carotenoids.violaxanthin de-epoxidase	cit.30844.1.s1_s_at;	moderately similar to ( 223)AT1G08550| Symbols: AVDE1 | NPQ1 (NON-PHOTOCHEMICAL QUENCHING 1) | chr1:2707465-2709390 FORWARD affx|C37_18434;	-1.46265
16.1.4.21	secondary metabolism.isoprenoids.carotenoids.violaxanthin de-epoxidase	cit.20251.1.s1_at;	weakly similar to ( 199)AT1G08550| Symbols: AVDE1 | NPQ1 (NON-PHOTOCHEMICAL QUENCHING 1) | chr1:2707465-2709390 FORWARD affx|C37_34993;	-2.58055
16.1.4.21	secondary metabolism.isoprenoids.carotenoids.violaxanthin de-epoxidase	cit.13924.1.s1_s_at;	moderately similar to ( 333)AT1G08550| Symbols: AVDE1 | NPQ1 (NON-PHOTOCHEMICAL QUENCHING 1) | chr1:2707465-2709390 FORWARD affx|C37_18435;	-2.28024
16.1.5	secondary metabolism.isoprenoids.terpenoids	cit.17266.1.s1_at;	weakly similar to ( 167)AT5G23960| Symbols: | terpene synthase/cyclase family protein | chr5:8092972-8095131 FORWARDweakly similar to ( 180)CASS_RICCO affx|C37_06646;	-1.94941
16.1.5	secondary metabolism.isoprenoids.terpenoids	cit.2694.1.s1_at;	highly similar to ( 502)AT3G25810| Symbols: | myrcene/ocimene synthase, putative | chr3:9432042-9435081 FORWARDmoderately similar to ( 316)DCS1_GOSHI affx|C37_03409;	-2.10429
16.1.5	secondary metabolism.isoprenoids.terpenoids	cit.13691.1.s1_at;	moderately similar to ( 297)AT2G17570| Symbols: | undecaprenyl pyrophosphate synthetase family protein / UPP synthetase family protein | chr2:7652168-7653055 FORWARD affx|C37_18116;	2.10628
16.1.5	secondary metabolism.isoprenoids.terpenoids	cit.17284.1.s1_at;	moderately similar to ( 452)AT5G23960| Symbols: | terpene synthase/cyclase family protein | chr5:8092972-8095131 FORWARDhighly similar to ( 572)DCS1_GOSHI affx|C37_06863;	-3.29598
16.1.5	secondary metabolism.isoprenoids.terpenoids	cit.29748.1.s1_s_at;	weakly similar to ( 160)AT3G14490| Symbols: | terpene synthase/cyclase family protein | chr3:4863638-4865956 REVERSEweakly similar to ( 200)DCS1_GOSHI affx|C37_06862;	-2.47367
16.1.5	secondary metabolism.isoprenoids.terpenoids	cit.1435.1.s1_at;	moderately similar to ( 351)AT1G61680| Symbols: | terpene synthase/cyclase family protein | chr1:22776120-22778352 REVERSEweakly similar to ( 122)DCS1_GOSHI affx|C37_01808;	2.09853
16.1.5	secondary metabolism.isoprenoids.terpenoids	cit.15608.1.s1_at;	moderately similar to ( 349)AT1G78955| Symbols: CAMS1 | CAMS1 (CAMELLIOL C SYNTHASE 1); beta-amyrin synthase | chr1:29694046-29699148 REVERSE affx|C37_20890;	-1.74293
16.1.5	secondary metabolism.isoprenoids.terpenoids	cit.22729.1.s1_at;	weakly similar to ( 168)AT5G23960| Symbols: | terpene synthase/cyclase family protein | chr5:8092972-8095131 FORWARDweakly similar to ( 191)CASS_RICCO affx|C37_33121;	1.24058
16.1.5	secondary metabolism.isoprenoids.terpenoids	cit.12845.1.s1_at;	moderately similar to ( 360)AT1G78955| Symbols: CAMS1 | CAMS1 (CAMELLIOL C SYNTHASE 1); beta-amyrin synthase | chr1:29694046-29699148 REVERSE affx|C37_17063;	9.55371
16.8.1.21	secondary metabolism.flavonoids.anthocyanins.anthocyanin 5-aromatic acyltransferase	cit.12480.1.s1_s_at;	moderately similar to ( 299)AT3G29590| Symbols: AT5MAT | AT5MAT; O-malonyltransferase/ transferase | chr3:11401396-11402745 REVERSE affx|C37_16593;	1.41562
16.8.1.21	secondary metabolism.flavonoids.anthocyanins.anthocyanin 5-aromatic acyltransferase	cit.6553.1.s1_at;	weakly similar to ( 145)AT3G29635| Symbols: | transferase family protein | chr3:11468330-11469706 REVERSE affx|C37_08561;	1.48993
16.8.1.21	secondary metabolism.flavonoids.anthocyanins.anthocyanin 5-aromatic acyltransferase	cit.3656.1.s1_at;	moderately similar to ( 304)AT3G29590| Symbols: AT5MAT | AT5MAT; O-malonyltransferase/ transferase | chr3:11401396-11402745 REVERSE affx|C37_04613;	-1.7828
16.8.1.21	secondary metabolism.flavonoids.anthocyanins.anthocyanin 5-aromatic acyltransferase	cit.14131.1.s1_at;	moderately similar to ( 276)AT3G29590| Symbols: AT5MAT | AT5MAT; O-malonyltransferase/ transferase | chr3:11401396-11402745 REVERSE affx|C37_18708;	-2.05881
16.8.1.21	secondary metabolism.flavonoids.anthocyanins.anthocyanin 5-aromatic acyltransferase	cit.31118.1.s1_at;	very weakly similar to (99.8)AT1G03495| Symbols: | transferase | chr1:873437-874833 FORWARD affx|C37_20805;	2.06401
16.8.1.21	secondary metabolism.flavonoids.anthocyanins.anthocyanin 5-aromatic acyltransferase	cit.6998.1.s1_at;	weakly similar to ( 105)AT1G03940| Symbols: | transferase family protein | chr1:1009541-1010950 REVERSE affx|C37_09321;	-1.80078
16.8.1.21	secondary metabolism.flavonoids.anthocyanins.anthocyanin 5-aromatic acyltransferase	cit.23994.1.s1_s_at;	weakly similar to ( 139)AT3G29635| Symbols: | transferase family protein | chr3:11468330-11469706 REVERSE affx|C37_40165;	-1.43738
16.8.2	secondary metabolism.flavonoids.chalcones	cit.10216.1.s1_at;	moderately similar to ( 301)AT3G55120| Symbols: TT5, A11, CFI | A11/CFI/TT5 (TRANSPARENT TESTA 5); chalcone isomerase | chr3:20441225-20442392 REVERSEmoderately similar to ( 320)CFI_VITVI affx|C37_13771;	-1.6247
16.8.2	secondary metabolism.flavonoids.chalcones	cit.8600.1.s1_x_at;	highly similar to ( 638)AT5G13930| Symbols: CHS, TT4, ATCHS | ATCHS/CHS/TT4 (CHALCONE SYNTHASE); naringenin-chalcone synthase | chr5:4488764-4490037 FORWARDhighly similar to ( 729)CHS2_CITSI affx|C37_11775;	-1.92461
16.8.2	secondary metabolism.flavonoids.chalcones	cit.29390.1.s1_at;	very weakly similar to (97.1)AT5G05270| Symbols: | chalcone-flavanone isomerase family protein | chr5:1563544-1564828 FORWARD affx|C37_01403;	-1.68164
16.8.2	secondary metabolism.flavonoids.chalcones	cit.19520.1.s1_s_at;	moderately similar to ( 264)AT5G13930| Symbols: CHS, TT4, ATCHS | ATCHS/CHS/TT4 (CHALCONE SYNTHASE); naringenin-chalcone synthase | chr5:4488764-4490037 FORWARDmoderately similar to ( 298)CHS2_CITSI affx|C37_28244;	-2.38614
16.8.2	secondary metabolism.flavonoids.chalcones	cit.21179.1.s1_at;	weakly similar to ( 114)AT5G13930| Symbols: CHS, TT4, ATCHS | ATCHS/CHS/TT4 (CHALCONE SYNTHASE); naringenin-chalcone synthase | chr5:4488764-4490037 FORWARDweakly similar to ( 132)CHS2_CITSI affx|C37_46243;	-1.93376
16.8.2	secondary metabolism.flavonoids.chalcones	cit.17011.1.s1_s_at;	weakly similar to ( 155)AT5G05270| Symbols: | chalcone-flavanone isomerase family protein | chr5:1563544-1564828 FORWARD affx|C37_01399;	-2.54266
16.8.2	secondary metabolism.flavonoids.chalcones	cit.10215.1.s1_s_at;	moderately similar to ( 297)AT3G55120| Symbols: TT5, A11, CFI | A11/CFI/TT5 (TRANSPARENT TESTA 5); chalcone isomerase | chr3:20441225-20442392 REVERSEmoderately similar to ( 313)CFI_VITVI affx|C37_13770;	-1.71652
16.8.2	secondary metabolism.flavonoids.chalcones	cit.13366.1.s1_at;	highly similar to ( 537)AT5G13930| Symbols: CHS, TT4, ATCHS | ATCHS/CHS/TT4 (CHALCONE SYNTHASE); naringenin-chalcone synthase | chr5:4488764-4490037 FORWARDhighly similar to ( 548)CHSY_VITVI affx|C37_17703;	-1.95432
16.8.2	secondary metabolism.flavonoids.chalcones	cit.1966.1.s1_s_at;	highly similar to ( 591)AT5G13930| Symbols: CHS, TT4, ATCHS | ATCHS/CHS/TT4 (CHALCONE SYNTHASE); naringenin-chalcone synthase | chr5:4488764-4490037 FORWARDhighly similar to ( 617)CHSY_VITVI affx|C37_02477;	1.4913
16.8.2	secondary metabolism.flavonoids.chalcones	cit.20054.1.s1_at;	very weakly similar to (97.1)AT1G59960| Symbols: | aldo/keto reductase, putative | chr1:22075075-22076732 REVERSEvery weakly similar to (93.2)NADO1_ORYSA affx|C37_30402;	1.66767
16.8.2	secondary metabolism.flavonoids.chalcones	cit.37518.1.s1_s_at;	moderately similar to ( 208)AT3G55120| Symbols: TT5, A11, CFI | A11/CFI/TT5 (TRANSPARENT TESTA 5); chalcone isomerase | chr3:20441225-20442392 REVERSEmoderately similar to ( 231)CFI_VITVI affx|C37_43414;	-1.85688
16.8.2	secondary metabolism.flavonoids.chalcones	cit.31558.1.s1_at;	highly similar to ( 644)AT5G13930| Symbols: CHS, TT4, ATCHS | ATCHS/CHS/TT4 (CHALCONE SYNTHASE); naringenin-chalcone synthase | chr5:4488764-4490037 FORWARDhighly similar to ( 741)CHS1_CITSI affx|C37_22977;	-1.55611
16.8.2	secondary metabolism.flavonoids.chalcones	cit.30458.1.s1_s_at;	moderately similar to ( 453)AT5G13930| Symbols: CHS, TT4, ATCHS | ATCHS/CHS/TT4 (CHALCONE SYNTHASE); naringenin-chalcone synthase | chr5:4488764-4490037 FORWARDhighly similar to ( 518)CHS2_CITSI affx|C37_11774;	-2.21279
16.8.3	secondary metabolism.flavonoids.dihydroflavonols	cit.1801.1.s1_at;	moderately similar to ( 458)AT2G02400| Symbols: | cinnamoyl-CoA reductase family | chr2:631412-632448 REVERSEweakly similar to ( 187)DFRA_DIACA affx|C37_02280;	1.52374
16.8.3	secondary metabolism.flavonoids.dihydroflavonols	cit.40492.1.s1_s_at;	weakly similar to ( 112)AT2G22930| Symbols: | glycosyltransferase family protein | chr2:9766846-9768174 FORWARDmoderately similar to ( 212)UFOG_PETHY affx|C37_47534;	-1.90417
16.8.3	secondary metabolism.flavonoids.dihydroflavonols	cit.1801.1.s1_x_at;	moderately similar to ( 458)AT2G02400| Symbols: | cinnamoyl-CoA reductase family | chr2:631412-632448 REVERSEweakly similar to ( 187)DFRA_DIACA affx|C37_02280;	1.40043
16.8.3	secondary metabolism.flavonoids.dihydroflavonols	cit.7705.1.s1_at;	very weakly similar to (81.3)AT5G53990| Symbols: | glycosyltransferase family protein | chr5:21932933-21934276 REVERSE affx|C37_10506;	-1.45791
16.8.3	secondary metabolism.flavonoids.dihydroflavonols	cit.1800.1.s1_at;	moderately similar to ( 231)AT2G02400| Symbols: | cinnamoyl-CoA reductase family | chr2:631412-632448 REVERSEweakly similar to ( 117)DFRA_DIACA affx|C37_02279;	-2.76707
16.8.3	secondary metabolism.flavonoids.dihydroflavonols	cit.17821.1.s1_s_at;	very weakly similar to (93.2)AT4G01070| Symbols: GT72B1 | GT72B1; UDP-glucosyltransferase/ UDP-glycosyltransferase/ transferase, transferring glycosyl groups | chr4:461858-463300 REVERSE affx|C37_14510;	-1.26465
16.8.4	secondary metabolism.flavonoids.flavonols	cit.25895.1.s1_at;	weakly similar to ( 105)AT5G08640| Symbols: FLS | FLS (FLAVONOL SYNTHASE) | chr5:2804010-2805176 FORWARDweakly similar to ( 120)FLS_PETHY affx|C37_31929;	-2.73412
16.8.4	secondary metabolism.flavonoids.flavonols	cit.39117.1.s1_at;	weakly similar to ( 101)AT2G44800| Symbols: | oxidoreductase, 2OG-Fe(II) oxygenase family protein | chr2:18474079-18475626 FORWARD affx|C37_45342;	1.559
16.8.4	secondary metabolism.flavonoids.flavonols	cit.871.1.s1_s_at;	moderately similar to ( 471)AT5G08640| Symbols: FLS | FLS (FLAVONOL SYNTHASE) | chr5:2804010-2805176 FORWARDmoderately similar to ( 492)FLS_PETHY affx|C37_01100;	-2.42592
16.2	secondary metabolism.phenylpropanoids	cit.19387.1.s1_s_at;	weakly similar to ( 167)AT1G77670| Symbols: | aminotransferase class I and II family protein | chr1:29193937-29195795 REVERSE affx|C37_27951;	1.42017
16.2	secondary metabolism.phenylpropanoids	cit.6310.1.s1_at;	weakly similar to ( 147)AT4G35160| Symbols: | O-methyltransferase family 2 protein | chr4:16730994-16732813 REVERSEmoderately similar to ( 244)7OMT9_MEDSA affx|C37_08175;	-1.30207
16.2	secondary metabolism.phenylpropanoids	cit.37314.1.s1_at;	weakly similar to ( 150)AT1G78990| Symbols: | transferase family protein | chr1:29718424-29719862 REVERSE affx|C37_43199;	-1.82505
16.2	secondary metabolism.phenylpropanoids	cit.3685.1.s1_s_at;	moderately similar to ( 311)AT2G22570| Symbols: ATNIC1, NIC2, NIC1 | ATNIC1/NIC1/NIC2 (A. THALIANA NICOTINAMIDASE 1); catalytic | chr2:9597101-9597926 REVERSE affx|C37_04651;	-1.33364
16.2	secondary metabolism.phenylpropanoids	cit.4553.1.s1_s_at;	moderately similar to ( 318)AT2G22570| Symbols: ATNIC1, NIC2, NIC1 | ATNIC1/NIC1/NIC2 (A. THALIANA NICOTINAMIDASE 1); catalytic | chr2:9597101-9597926 REVERSE affx|C37_05774;	-1.23906
16.2	secondary metabolism.phenylpropanoids	cit.11230.1.s1_at;	moderately similar to ( 286)AT1G28680| Symbols: | transferase family protein | chr1:10078208-10079749 FORWARD affx|C37_15032;	-2.24712
16.2	secondary metabolism.phenylpropanoids	cit.5087.1.s1_at;	moderately similar to ( 440)AT5G48930| Symbols: HCT | transferase family protein | chr5:19853880-19855318 REVERSEmoderately similar to ( 327)HCBT2_DIACA affx|C37_06450;	1.58757
16.2	secondary metabolism.phenylpropanoids	cit.15542.1.s1_at;	highly similar to ( 597)AT5G41040| Symbols: | transferase family protein | chr5:16448810-16450314 FORWARDweakly similar to ( 191)HCBT1_DIACA affx|C37_20788;	1.47721
16.2	secondary metabolism.phenylpropanoids	cit.11230.1.s1_s_at;	moderately similar to ( 286)AT1G28680| Symbols: | transferase family protein | chr1:10078208-10079749 FORWARD affx|C37_15032;	-2.01395
16.2	secondary metabolism.phenylpropanoids	cit.12818.1.s1_at;	moderately similar to ( 434)AT5G48930| Symbols: HCT | transferase family protein | chr5:19853880-19855318 REVERSEmoderately similar to ( 304)HCBT2_DIACA affx|C37_17031;	-2.1749
16.2	secondary metabolism.phenylpropanoids	cit.13551.1.s1_s_at;	moderately similar to ( 380)AT5G17540| Symbols: | transferase family protein | chr5:5782063-5783684 REVERSEweakly similar to ( 164)HCBT1_DIACA affx|C37_17937;	-2.0182
16.2	secondary metabolism.phenylpropanoids	cit.10244.1.s1_s_at;	weakly similar to ( 171)AT4G35160| Symbols: | O-methyltransferase family 2 protein | chr4:16730994-16732813 REVERSEmoderately similar to ( 315)7OMT9_MEDSA affx|C37_13806;	-2.11214
16.2	secondary metabolism.phenylpropanoids	cit.13387.1.s1_at;	moderately similar to ( 233)AT3G26040| Symbols: | transferase family protein | chr3:9520978-9522306 FORWARD affx|C37_17727;	-2.32554
16.2	secondary metabolism.phenylpropanoids	cit.2586.1.s1_s_at;	weakly similar to ( 167)AT1G24430| Symbols: | transferase family protein | chr1:8658179-8659174 REVERSE affx|C37_03270;	9.24607
16.2	secondary metabolism.phenylpropanoids	cit.23407.1.s1_s_at;	weakly similar to ( 162)AT5G42830| Symbols: | transferase family protein | chr5:17193612-17195134 FORWARD affx|C37_37803;	1.80839
16.2	secondary metabolism.phenylpropanoids	cit.12172.1.s1_at;	weakly similar to ( 167)AT4G35160| Symbols: | O-methyltransferase family 2 protein | chr4:16730994-16732813 REVERSEmoderately similar to ( 223)7OMT8_MEDSA affx|C37_16206;	-1.84994
16.2	secondary metabolism.phenylpropanoids	cit.7237.1.s1_at;	moderately similar to ( 272)AT5G01210| Symbols: | transferase family protein | chr5:84553-85980 FORWARD affx|C37_09754;	1.92813
16.2	secondary metabolism.phenylpropanoids	cit.27992.1.s1_s_at;	weakly similar to ( 131)AT3G26040| Symbols: | transferase family protein | chr3:9520978-9522306 FORWARD affx|C37_37571;	9.26484
16.2	secondary metabolism.phenylpropanoids	cit.12658.1.s1_s_at;	moderately similar to ( 299)AT4G24520| Symbols: AR1, ATR1 | ATR1 (ARABIDOPSIS P450 REDUCTASE 1) | chr4:12663075-12667076 REVERSEmoderately similar to ( 300)NCPR_PHAAU affx|C37_16823;	-1.28467
16.2.1	secondary metabolism.phenylpropanoids.lignin biosynthesis	cit.37373.1.s1_at;	weakly similar to ( 114)AT2G18570| Symbols: | UDP-glucoronosyl/UDP-glucosyl transferase family protein | chr2:8070511-8071923 FORWARD affx|C37_43260;	-1.82171
16.2.1.1	secondary metabolism.phenylpropanoids.lignin biosynthesis.PAL	cit.17740.1.s1_s_at;	weakly similar to ( 170)AT2G37040| Symbols: PAL1 | PAL1 (PHE AMMONIA LYASE 1); phenylalanine ammonia-lyase | chr2:15564681-15567316 REVERSEweakly similar to ( 170)PALY_VITVI affx|C37_13010;	-1.74239
16.2.1.3	secondary metabolism.phenylpropanoids.lignin biosynthesis.4CL	cit.13420.1.s1_at;	moderately similar to ( 371)AT3G48990| Symbols: | AMP-dependent synthetase and ligase family protein | chr3:18170016-18172279 REVERSEweakly similar to ( 135)4CL2_ORYSA affx|C37_17774;	1.64509
16.2.1.3	secondary metabolism.phenylpropanoids.lignin biosynthesis.4CL	cit.14377.1.s1_at;	moderately similar to ( 220)AT3G21240| Symbols: AT4CL2, 4CL2 | 4CL2 (4-coumarate:CoA ligase 2); 4-coumarate-CoA ligase | chr3:7454503-7457320 REVERSEmoderately similar to ( 232)4CL2_TOBAC affx|C37_19049;	-2.39918
16.2.1.3	secondary metabolism.phenylpropanoids.lignin biosynthesis.4CL	cit.11987.1.s1_s_at;	highly similar to ( 625)AT1G65060| Symbols: 4CL3 | 4CL3 (4-coumarate:CoA ligase 3); 4-coumarate-CoA ligase | chr1:24171590-24175120 REVERSEhighly similar to ( 687)4CL2_SOYBN affx|C37_15975;	-2.55894
16.2.1.3	secondary metabolism.phenylpropanoids.lignin biosynthesis.4CL	cit.6766.1.s1_s_at;	moderately similar to ( 366)AT3G16170| Symbols: | acyl-activating enzyme 13 (AAE13) | chr3:5476496-5480134 FORWARDvery weakly similar to (95.9)4CL2_TOBAC affx|C37_08903;	-1.21054
16.2.1.4	secondary metabolism.phenylpropanoids.lignin biosynthesis.HCT	cit.27537.1.s1_at;	weakly similar to ( 113)AT5G48930| Symbols: HCT | transferase family protein | chr5:19853880-19855318 REVERSEweakly similar to ( 106)HCBT3_DIACA affx|C37_36284;	-1.3681
16.2.1.4	secondary metabolism.phenylpropanoids.lignin biosynthesis.HCT	cit.12817.1.s1_at;	weakly similar to ( 177)AT5G48930| Symbols: HCT | transferase family protein | chr5:19853880-19855318 REVERSEweakly similar to ( 113)HCBT2_DIACA affx|C37_17030;	-1.44474
16.2.1.4	secondary metabolism.phenylpropanoids.lignin biosynthesis.HCT	cit.22140.1.s1_at;	moderately similar to ( 219)AT5G48930| Symbols: HCT | transferase family protein | chr5:19853880-19855318 REVERSEweakly similar to ( 155)HCBT2_DIACA affx|C37_30355;	-1.89892
16.2.1.4	secondary metabolism.phenylpropanoids.lignin biosynthesis.HCT	cit.23440.1.s1_at;	moderately similar to ( 253)AT5G48930| Symbols: HCT | transferase family protein | chr5:19853880-19855318 REVERSEweakly similar to ( 160)HCBT2_DIACA affx|C37_37948;	-1.58709
16.2.1.4	secondary metabolism.phenylpropanoids.lignin biosynthesis.HCT	cit.25118.1.s1_s_at;	weakly similar to ( 131)AT5G48930| Symbols: HCT | transferase family protein | chr5:19853880-19855318 REVERSEvery weakly similar to (80.5)HCBT2_DIACA affx|C37_27220;	-1.54483
16.2.1.4	secondary metabolism.phenylpropanoids.lignin biosynthesis.HCT	cit.14337.1.s1_at;	weakly similar to ( 164)AT5G48930| Symbols: HCT | transferase family protein | chr5:19853880-19855318 REVERSEweakly similar to ( 117)HCBT2_DIACA affx|C37_18999;	3.12112
16.2.1.6	secondary metabolism.phenylpropanoids.lignin biosynthesis.CCoAOMT	cit.31936.1.s1_at;	moderately similar to ( 291)AT3G62000| Symbols: | O-methyltransferase family 3 protein | chr3:22970416-22972155 REVERSEweakly similar to ( 126)CAMT2_MAIZE affx|C37_23462;	-1.53294
16.2.1.6	secondary metabolism.phenylpropanoids.lignin biosynthesis.CCoAOMT	cit.22186.1.s1_s_at;	weakly similar to ( 159)AT4G34050| Symbols: | caffeoyl-CoA 3-O-methyltransferase, putative | chr4:16310849-16311978 FORWARDweakly similar to ( 158)CAMT_SOLTU affx|C37_30544;	2.15845
16.2.1.6	secondary metabolism.phenylpropanoids.lignin biosynthesis.CCoAOMT	cit.17602.1.s1_x_at;	moderately similar to ( 380)AT4G34050| Symbols: | caffeoyl-CoA 3-O-methyltransferase, putative | chr4:16310849-16311978 FORWARDmoderately similar to ( 382)CAMT_SOLTU affx|C37_11224;	-1.62379
16.2.1.9	secondary metabolism.phenylpropanoids.lignin biosynthesis.COMT	cit.8933.1.s1_s_at;	moderately similar to ( 325)AT5G54160| Symbols: OMT1, ATOMT1 | ATOMT1 (O-METHYLTRANSFERASE 1) | chr5:21999301-22001393 FORWARDmoderately similar to ( 341)COMT1_MEDSA affx|C37_12202;	-1.28096
16.2.1.9	secondary metabolism.phenylpropanoids.lignin biosynthesis.COMT	cit.8930.1.s1_s_at;	weakly similar to ( 163)AT5G54160| Symbols: OMT1, ATOMT1 | ATOMT1 (O-METHYLTRANSFERASE 1) | chr5:21999301-22001393 FORWARDweakly similar to ( 174)COMT1_MEDSA affx|C37_12199;	-1.6603
16.2.1.9	secondary metabolism.phenylpropanoids.lignin biosynthesis.COMT	cit.1071.1.s1_s_at;	highly similar to ( 544)AT3G53140| Symbols: | O-diphenol-O-methyl transferase, putative | chr3:19706670-19708333 FORWARDmoderately similar to ( 237)COMT1_CATRO affx|C37_01360;	-1.29068
16.2.1.9	secondary metabolism.phenylpropanoids.lignin biosynthesis.COMT	cit.8931.1.s1_at;	moderately similar to ( 327)AT5G54160| Symbols: OMT1, ATOMT1 | ATOMT1 (O-METHYLTRANSFERASE 1) | chr5:21999301-22001393 FORWARDmoderately similar to ( 342)COMT1_MEDSA affx|C37_12200;	-1.50194
16.2.1.9	secondary metabolism.phenylpropanoids.lignin biosynthesis.COMT	cit.14122.1.s1_at;	moderately similar to ( 241)AT5G54160| Symbols: OMT1, ATOMT1 | ATOMT1 (O-METHYLTRANSFERASE 1) | chr5:21999301-22001393 FORWARDmoderately similar to ( 232)COMT1_MEDSA affx|C37_18698;	-2.50297
16.2.1.9	secondary metabolism.phenylpropanoids.lignin biosynthesis.COMT	cit.4325.1.s1_s_at;	moderately similar to ( 218)AT5G54160| Symbols: OMT1, ATOMT1 | ATOMT1 (O-METHYLTRANSFERASE 1) | chr5:21999301-22001393 FORWARDmoderately similar to ( 219)COMT1_MEDSA affx|C37_05490;	2.96662
16.2.1.9	secondary metabolism.phenylpropanoids.lignin biosynthesis.COMT	cit.8934.1.s1_s_at;	moderately similar to ( 212)AT5G54160| Symbols: OMT1, ATOMT1 | ATOMT1 (O-METHYLTRANSFERASE 1) | chr5:21999301-22001393 FORWARDmoderately similar to ( 223)COMT1_MEDSA affx|C37_12203;	-2.09818
16.2.1.9	secondary metabolism.phenylpropanoids.lignin biosynthesis.COMT	cit.12172.1.s1_at;	weakly similar to ( 167)AT4G35160| Symbols: | O-methyltransferase family 2 protein | chr4:16730994-16732813 REVERSEmoderately similar to ( 223)7OMT8_MEDSA affx|C37_16206;	-1.84994
16.2.1.10	secondary metabolism.phenylpropanoids.lignin biosynthesis.CAD	cit.9171.1.s1_at;	moderately similar to ( 222)AT4G37980| Symbols: ELI3-1 | ELI3-1 (ELICITOR-ACTIVATED GENE 3); binding / catalytic/ oxidoreductase/ zinc ion binding | chr4:17852664-17853908 FORWARDmoderately similar to ( 237)MTDH_FRAAN affx|C37_12490;	-1.22351
16.2.1.10	secondary metabolism.phenylpropanoids.lignin biosynthesis.CAD	cit.31512.1.s1_at;	moderately similar to ( 295)AT4G39330| Symbols: | mannitol dehydrogenase, putative | chr4:18291262-18292734 FORWARDmoderately similar to ( 294)MTDH_MESCR affx|C37_22714;	-1.65508
16.2.1.10	secondary metabolism.phenylpropanoids.lignin biosynthesis.CAD	cit.28135.1.s1_at;	weakly similar to ( 112)AT1G72680| Symbols: | cinnamyl-alcohol dehydrogenase, putative | chr1:27363008-27364538 REVERSEvery weakly similar to (81.6)MTDH_FRAAN affx|C37_38077;	-1.98984
16.2.1.10	secondary metabolism.phenylpropanoids.lignin biosynthesis.CAD	cit.36909.1.s1_s_at;	moderately similar to ( 318)AT4G37990| Symbols: ELI3, ELI3-2 | ELI3-2 (ELICITOR-ACTIVATED GENE 3) | chr4:17855958-17857382 FORWARDmoderately similar to ( 341)MTDH_FRAAN affx|C37_40519;	2.00249
16.4.1	secondary metabolism.N misc.alkaloid-like	cit.5103.1.s1_at;	weakly similar to ( 168)AT3G51420| Symbols: | strictosidine synthase family protein | chr3:19095061-19096430 FORWARD affx|C37_06466;	-1.31039
16.4.1	secondary metabolism.N misc.alkaloid-like	cit.308.1.s1_s_at;	weakly similar to ( 153)AT3G51420| Symbols: | strictosidine synthase family protein | chr3:19095061-19096430 FORWARD affx|C37_00382;	-1.85875
16.4.1	secondary metabolism.N misc.alkaloid-like	cit.5658.1.s1_at;	moderately similar to ( 395)AT2G41290| Symbols: | strictosidine synthase family protein | chr2:17217677-17219982 REVERSEweakly similar to ( 191)STSY_CATRO affx|C37_07226;	-2.36203
16.4.1	secondary metabolism.N misc.alkaloid-like	cit.18001.1.s1_at;	highly similar to ( 583)AT2G20340| Symbols: | tyrosine decarboxylase, putative | chr2:8786885-8789571 FORWARDhighly similar to ( 701)TYDC3_PETCR affx|C37_18080;	-2.69302
16.4.2	secondary metabolism.N misc.betaine	cit.26340.1.s1_at;	moderately similar to ( 243)AT3G24503| Symbols: ALDH1A, REF1, ALDH2C4 | ALDH2C4 (REDUCED EPIDERMAL FLUORESCENCE1); 3-chloroallyl aldehyde dehydrogenase/ aldehyde dehydrogenase (NAD) | chr3:8919739-8923036 REVERSEweakly similar to ( 141)BADH_SPIOL affx|C37_33166;	-1.51104
16.4.2	secondary metabolism.N misc.betaine	cit.2639.1.s1_s_at;	highly similar to ( 741)AT1G79440| Symbols: SSADH1, SSADH, ALDH5F1 | ALDH5F1 (SUCCINIC SEMIALDEHYDE DEHYDROGENASE); 3-chloroallyl aldehyde dehydrogenase/ succinate-semialdehyde dehydrogenase | chr1:29887418-29892168 REVERSEmoderately similar to ( 344)BADH_SPIOL affx|C37_03346;	-1.32498
16.4.2	secondary metabolism.N misc.betaine	cit.30486.1.s1_s_at;	moderately similar to ( 231)AT3G48000| Symbols: ALDH2, ALDH2B4 | ALDH2B4 (ALDEHYDE DEHYDROGENASE 2); 3-chloroallyl aldehyde dehydrogenase/ aldehyde dehydrogenase (NAD) | chr3:17728067-17730828 REVERSEweakly similar to ( 115)BADH_BETVU affx|C37_12076;	-1.33443
16.99	secondary metabolism.unspecified	cit.26774.1.s1_at;	moderately similar to ( 356)AT5G04620| Symbols: ATBIOF | ATBIOF; transaminase | chr5:1328005-1329935 FORWARD affx|C37_34451;	-1.60411
