# Supplementary material for: Alternate Bearing in Citrus: Changes in the Expression of Flowering Control Genes and in Global Gene Expression in ON- versus OFF-Crop Trees
Source: PLoS One. 2012 Oct 11;7(10):e46930. doi: 10.1371/journal.pone.0046930 (PMC3469648; doi:10.1371/journal.pone.0046930)
Supplement: Table S6 — Probe list of Fig. S3. (XLSX) [file pone.0046930.s012.xlsx]

## Sheet: fig. S1 probes
BinCode	BinName	Probe ID	Description	May Bud On Off FC
1.1.1.1	PS.lightreaction.photosystem II.LHC-II	cit.14671.1.s1_at;	weakly similar to ( 159)AT1G76570| Symbols: | chlorophyll A-B binding family protein | chr1:28734026-28735648 FORWARDvery weakly similar to (99.8)CB23_HORVU affx|C37_19448;	-1.56334
1.1.1.1	PS.lightreaction.photosystem II.LHC-II	cit.10415.1.s1_s_at;	moderately similar to ( 407)AT2G40100| Symbols: LHCB4.3 | LHCB4.3 (LIGHT HARVESTING COMPLEX PSII); chlorophyll binding | chr2:16752962-16754268 FORWARDmoderately similar to ( 248)CB29_CHLRE affx|C37_14024;	-1.65227
1.1.1.1	PS.lightreaction.photosystem II.LHC-II	cit.29925.1.s1_at;	moderately similar to ( 327)AT1G45474| Symbols: LHCA5 | LHCA5 (Photosystem I light harvesting complex gene 5) | chr1:17181793-17182879 FORWARDweakly similar to ( 179)CB12_PETHY affx|C37_08452;	-1.47527
1.1.1.1	PS.lightreaction.photosystem II.LHC-II	cit.9222.1.s1_at;	moderately similar to ( 459)AT4G10340| Symbols: LHCB5 | LHCB5 (LIGHT HARVESTING COMPLEX OF PHOTOSYSTEM II 5); chlorophyll binding | chr4:6408196-6409492 FORWARDmoderately similar to ( 213)CB2B_PINSY affx|C37_12551;	-1.8925
1.1.1.1	PS.lightreaction.photosystem II.LHC-II	cit.10417.1.s1_at;	moderately similar to ( 232)AT2G40100| Symbols: LHCB4.3 | LHCB4.3 (LIGHT HARVESTING COMPLEX PSII); chlorophyll binding | chr2:16752962-16754268 FORWARDweakly similar to ( 140)CB29_CHLRE affx|C37_14026;	-1.63588
1.1.1.1	PS.lightreaction.photosystem II.LHC-II	cit.9901.1.s1_s_at;	moderately similar to ( 436)AT1G61520| Symbols: LHCA3 | LHCA3 (Photosystem I light harvesting complex gene 3) | chr1:22704158-22704814 FORWARDweakly similar to ( 153)CB12_PETHY affx|C37_13382;	-1.51397
1.1.1.2	PS.lightreaction.photosystem II.PSII polypeptide subunits	cit.13236.1.s1_s_at;	moderately similar to ( 205)AT4G28660| Symbols: PSB28 | PSB28 (PHOTOSYSTEM II REACTION CENTER PSB28 PROTEIN) | chr4:14150014-14150939 FORWARD affx|C37_17537;	-2.61903
1.1.1.2	PS.lightreaction.photosystem II.PSII polypeptide subunits	cit.9106.1.s1_s_at;	highly similar to ( 535)AT3G50820| Symbols: PSBO2, PSBO-2 | PSBO-2/PSBO2 (PHOTOSYSTEM II SUBUNIT O-2); oxygen evolving/ poly(U) binding | chr3:18901989-18903292 REVERSEhighly similar to ( 575)PSBO_TOBAC affx|C37_12413;	-1.23757
1.1.1.2	PS.lightreaction.photosystem II.PSII polypeptide subunits	cit.10161.1.s1_s_at;	moderately similar to ( 286)AT1G44575| Symbols: PSBS, NPQ4 | NPQ4 (NONPHOTOCHEMICAL QUENCHING) | chr1:16874208-16874988 FORWARDmoderately similar to ( 310)PSBS_SPIOL affx|C37_13699;	-1.90566
1.1.1.2	PS.lightreaction.photosystem II.PSII polypeptide subunits	cit.8719.1.s1_s_at;	very weakly similar to (83.2)AT2G30570| Symbols: PSBW | PSBW (PHOTOSYSTEM II REACTION CENTER W) | chr2:13026403-13027130 REVERSEvery weakly similar to (85.1)PSBW_SPIOL affx|C37_11929;	-1.3682
1.1.1.2	PS.lightreaction.photosystem II.PSII polypeptide subunits	cit.17677.1.s1_at;	very weakly similar to (84.3)AT2G30570| Symbols: PSBW | PSBW (PHOTOSYSTEM II REACTION CENTER W) | chr2:13026403-13027130 REVERSEvery weakly similar to (88.2)PSBW_SPIOL affx|C37_11943;	-1.72889
1.1.1.2	PS.lightreaction.photosystem II.PSII polypeptide subunits	cit.16494.1.s1_at;	weakly similar to ( 119)AT5G51545| Symbols: LPA2 | LPA2 (LOW PSII ACCUMULATION2) | chr5:20953660-20954469 FORWARD affx|C37_22405;	-1.40849
1.1.1.2	PS.lightreaction.photosystem II.PSII polypeptide subunits	cit.39409.1.s1_at;	moderately similar to ( 229)AT5G11450| Symbols: | oxygen-evolving complex-related | chr5:3654476-3656358 FORWARD affx|C37_45769;	-1.3756
1.1.1.2	PS.lightreaction.photosystem II.PSII polypeptide subunits	cit.6147.1.s1_at;	weakly similar to ( 197)AT1G14150| Symbols: | oxygen evolving enhancer 3 (PsbQ) family protein | chr1:4839882-4840629 FORWARD affx|C37_07915;	-1.7908
1.1.1.2	PS.lightreaction.photosystem II.PSII polypeptide subunits	cit.7504.1.s1_at;	moderately similar to ( 246)AT2G39470| Symbols: PPL2 | PPL2 (PSBP-LIKE PROTEIN 2); calcium ion binding | chr2:16483413-16484480 FORWARD affx|C37_10197;	-1.58119
1.1.1.2	PS.lightreaction.photosystem II.PSII polypeptide subunits	cit.13238.1.s1_at;	moderately similar to ( 204)AT4G28660| Symbols: PSB28 | PSB28 (PHOTOSYSTEM II REACTION CENTER PSB28 PROTEIN) | chr4:14150014-14150939 FORWARD affx|C37_17539;	-2.06948
1.1.1.2	PS.lightreaction.photosystem II.PSII polypeptide subunits	cit.38474.1.s1_at;	weakly similar to ( 175)AT3G56650| Symbols: | thylakoid lumenal 20 kDa protein | chr3:20995786-20996892 FORWARD affx|C37_44410;	-1.38698
1.1.1.2	PS.lightreaction.photosystem II.PSII polypeptide subunits	cit.19900.1.s1_at;	weakly similar to ( 118)AT5G02120| Symbols: OHP | OHP (ONE HELIX PROTEIN) | chr5:419141-419630 FORWARD affx|C37_28988;	-1.37513
1.1.1.2	PS.lightreaction.photosystem II.PSII polypeptide subunits	cit.31219.1.s1_at;	moderately similar to ( 296)AT4G15510| Symbols: | photosystem II reaction center PsbP family protein | chr4:8861349-8862527 FORWARD affx|C37_21367;	-1.35966
1.1.1.2	PS.lightreaction.photosystem II.PSII polypeptide subunits	cit.10162.1.s1_at;	moderately similar to ( 287)AT1G44575| Symbols: PSBS, NPQ4 | NPQ4 (NONPHOTOCHEMICAL QUENCHING) | chr1:16874208-16874988 FORWARDmoderately similar to ( 311)PSBS_SPIOL affx|C37_13700;	-1.74972
1.1.1.2	PS.lightreaction.photosystem II.PSII polypeptide subunits	cit.6148.1.s1_s_at;	weakly similar to ( 196)AT1G14150| Symbols: | oxygen evolving enhancer 3 (PsbQ) family protein | chr1:4839882-4840629 FORWARD affx|C37_07916;	-1.88212
1.1.1.2	PS.lightreaction.photosystem II.PSII polypeptide subunits	cit.5392.1.s1_s_at;	weakly similar to ( 192)AT1G03600| Symbols: | photosystem II family protein | chr1:898915-899439 FORWARD affx|C37_06839;	-1.77327
1.1.3	PS.lightreaction.cytochrome b6/f	cit.10097.1.s1_s_at;	moderately similar to ( 345)AT4G03280| Symbols: PGR1, PETC | PETC (PHOTOSYNTHETIC ELECTRON TRANSFER C) | chr4:1440462-1441717 FORWARDmoderately similar to ( 346)UCRIA_PEA affx|C37_13623;	-1.39544
1.1.3	PS.lightreaction.cytochrome b6/f	cit.9493.1.s1_s_at;	weakly similar to ( 127)AT2G26500| Symbols: | cytochrome b6f complex subunit (petM), putative | chr2:11277448-11277825 FORWARD affx|C37_12883;	-1.66535
1.1.4	PS.lightreaction.ATP synthase	cit.25453.1.s1_at;	weakly similar to ( 137)AT2G31040| Symbols: | ATP synthase protein I -related | chr2:13216171-13218089 REVERSE affx|C37_30568;	-1.89779
1.1.4	PS.lightreaction.ATP synthase	cit.12228.1.s1_s_at;	highly similar to ( 526)AT4G04640| Symbols: ATPC1 | ATPC1 (ATP synthase gamma chain 1) | chr4:2350759-2351880 REVERSEhighly similar to ( 546)ATPG_TOBAC affx|C37_16282;	-1.46001
1.1.4	PS.lightreaction.ATP synthase	cit.12888.1.s1_s_at;	moderately similar to ( 246)AT4G09650| Symbols: | ATP synthase delta chain, chloroplast, putative / H(+)-transporting two-sector ATPase, delta (OSCP) subunit, putative | chr4:6100796-6101500 FORWARDmoderately similar to ( 239)ATPD_TOBAC affx|C37_17112;	-1.33543
1.1.4	PS.lightreaction.ATP synthase	cit.14805.1.s1_at;	moderately similar to ( 400)ATCG00150| Symbols: ATPI | Encodes a subunit of ATPase complex CF0, which is a proton channel that supplies the proton motive force to drive ATP synthesis by CF1 portion of the complex. | chrC:14021-14770 REVERSEmoderately similar to ( 400)ATPI_OENHO affx|C37_19647;	-1.44966
1.1.4	PS.lightreaction.ATP synthase	cit.12953.1.s1_at;	moderately similar to ( 469)AT1G15700| Symbols: ATPC2 | ATPC2 (ATP synthase gamma chain 2) | chr1:5402624-5403784 REVERSEmoderately similar to ( 471)ATPG_TOBAC affx|C37_17184;	-1.2967
1.1.4	PS.lightreaction.ATP synthase	cit.4737.1.s1_s_at;	moderately similar to ( 434)AT2G31040| Symbols: | ATP synthase protein I -related | chr2:13216171-13218089 REVERSE affx|C37_06006;	-1.31955
1.1.4	PS.lightreaction.ATP synthase	cit.4764.1.s1_at;	weakly similar to ( 187)AT4G32260| Symbols: | ATP synthase family | chr4:15573865-15574592 REVERSEweakly similar to ( 188)ATPX_SPIOL affx|C37_06037;	-1.80764
1.1.4	PS.lightreaction.ATP synthase	cit.17975.1.s1_s_at;	moderately similar to ( 205)ATCG00120| Symbols: ATPA | Encodes the ATPase alpha subunit, which is a subunit of ATP synthase and part of the CF1 portion which catalyzes the conversion of ADP to ATP using the proton motive force. This complex is located in the thylakoid membrane of the chloroplast. | chrC:9938-11461 REVERSEmoderately similar to ( 212)ATPA_TOBAC affx|C37_17485;	-1.63511
1.1.2.2	PS.lightreaction.photosystem I.PSI polypeptide subunits	cit.30471.1.s1_s_at;	weakly similar to ( 124)AT5G64040| Symbols: PSAN | PSAN (photosystem I reaction center subunit PSI-N); calmodulin binding | chr5:25645916-25646635 REVERSEweakly similar to ( 124)PSAN_MAIZE affx|C37_11916;	-1.30951
1.1.2.2	PS.lightreaction.photosystem I.PSI polypeptide subunits	cit.30551.1.s1_at;	moderately similar to ( 266)AT4G12800| Symbols: PSAL | PSAL (photosystem I subunit L) | chr4:7521466-7522490 FORWARDmoderately similar to ( 273)PSAL_CUCSA affx|C37_13560;	-1.93472
1.1.2.2	PS.lightreaction.photosystem I.PSI polypeptide subunits	cit.30658.1.s1_at;	weakly similar to ( 120)AT2G46820| Symbols: PTAC8, TMP14, PSAP, PSI-P | PSAP/PSI-P/PTAC8/TMP14 (THYLAKOID MEMBRANE PHOSPHOPROTEIN OF 14 KDA) | chr2:19250798-19251939 FORWARD affx|C37_15834;	-2.33217
1.1.2.2	PS.lightreaction.photosystem I.PSI polypeptide subunits	cit.8714.1.s1_s_at;	moderately similar to ( 204)AT5G64040| Symbols: PSAN | PSAN (photosystem I reaction center subunit PSI-N); calmodulin binding | chr5:25645916-25646635 REVERSEweakly similar to ( 164)PSAN_MAIZE affx|C37_11922;	-1.32498
1.1.2.2	PS.lightreaction.photosystem I.PSI polypeptide subunits	cit.1402.1.s1_s_at;	weakly similar to ( 178)AT1G52230| Symbols: PSAH2, PSAH-2, PSI-H | PSAH-2/PSAH2/PSI-H (PHOTOSYSTEM I SUBUNIT H-2) | chr1:19458571-19459177 FORWARDweakly similar to ( 181)PSAH_BRARA affx|C37_01769;	-1.22764
1.1.2.2	PS.lightreaction.photosystem I.PSI polypeptide subunits	cit.11876.1.s1_s_at;	weakly similar to ( 159)AT2G46820| Symbols: PTAC8, TMP14, PSAP, PSI-P | PSAP/PSI-P/PTAC8/TMP14 (THYLAKOID MEMBRANE PHOSPHOPROTEIN OF 14 KDA) | chr2:19250798-19251939 FORWARD affx|C37_15835;	-1.29742
1.1.2.2	PS.lightreaction.photosystem I.PSI polypeptide subunits	cit.21356.1.s1_s_at;	weakly similar to ( 166)AT1G30380| Symbols: PSAK | PSAK (PHOTOSYSTEM I SUBUNIT K) | chr1:10722307-10722995 FORWARDweakly similar to ( 169)PSAK_MEDSA affx|C37_46760;	-1.27141
1.1.5.2	PS.lightreaction.other electron carrier (ox/red).ferredoxin	cit.17233.1.s1_at;	weakly similar to ( 191)AT1G60950| Symbols: ATFD2, FED A | FED A (FERREDOXIN 2); 2 iron, 2 sulfur cluster binding / electron carrier/ iron-sulfur cluster binding | chr1:22448230-22448676 FORWARDweakly similar to ( 188)FER_CAPAN affx|C37_05798;	-5.16943
1.1.5.2	PS.lightreaction.other electron carrier (ox/red).ferredoxin	cit.6529.1.s1_at;	weakly similar to ( 149)AT1G02180| Symbols: | ferredoxin-related | chr1:413619-414505 REVERSE affx|C37_08523;	1.59203
1.1.5.2	PS.lightreaction.other electron carrier (ox/red).ferredoxin	cit.7901.1.s1_at;	weakly similar to ( 161)AT4G32590| Symbols: | ferredoxin-related | chr4:15721423-15722787 FORWARD affx|C37_10844;	-1.5724
1.1.5.3	PS.lightreaction.other electron carrier (ox/red).ferredoxin reductase	cit.529.1.s1_at;	highly similar to ( 595)AT5G66190| Symbols: ATLFNR1 | ATLFNR1 (LEAF FNR 1); poly(U) binding | chr5:26468429-26469842 REVERSEhighly similar to ( 614)FENR1_TOBAC affx|C37_00643;	-1.41315
1.3.12	PS.calvin cyle.PRK	cit.11692.1.s1_s_at;	highly similar to ( 651)AT1G32060| Symbols: PRK | PRK (PHOSPHORIBULOKINASE); ATP binding / phosphoribulokinase/ protein binding | chr1:11532648-11534386 FORWARDhighly similar to ( 672)KPPR_MESCR affx|C37_15596;	-2.19986
1.3.2	PS.calvin cyle.rubisco small subunit	cit.1818.1.s1_at;	weakly similar to ( 191)AT5G38410| Symbols: | ribulose bisphosphate carboxylase small chain 3B / RuBisCO small subunit 3B (RBCS-3B) (ATS3B) | chr5:15394731-15395536 REVERSEweakly similar to ( 195)RBS_PINTH affx|C37_02299;	-1.71449
1.3.2	PS.calvin cyle.rubisco small subunit	cit.8578.1.s1_at;	weakly similar to ( 135)AT1G67090| Symbols: RBCS1A | RBCS1A; ribulose-bisphosphate carboxylase | chr1:25052253-25052912 REVERSEweakly similar to ( 145)RBS_LACSA affx|C37_11744;	-3.69423
1.3.2	PS.calvin cyle.rubisco small subunit	cit.1816.1.s1_s_at;	weakly similar to ( 190)AT5G38410| Symbols: | ribulose bisphosphate carboxylase small chain 3B / RuBisCO small subunit 3B (RBCS-3B) (ATS3B) | chr5:15394731-15395536 REVERSEweakly similar to ( 195)RBS_MAIZE affx|C37_02297;	-1.87578
1.3.13	PS.calvin cyle.rubisco interacting	cit.8821.1.s1_s_at;	highly similar to ( 741)AT2G39730| Symbols: RCA | RCA (RUBISCO ACTIVASE) | chr2:16578252-16580423 REVERSEhighly similar to ( 723)RCA_ORYSA affx|C37_12064;	-1.44371
1.3.13	PS.calvin cyle.rubisco interacting	cit.20550.1.s1_at;	weakly similar to ( 109)AT2G39730| Symbols: RCA | RCA (RUBISCO ACTIVASE) | chr2:16578252-16580423 REVERSEweakly similar to ( 128)RCA_MALDO affx|C37_43534;	-3.78385
1.3.13	PS.calvin cyle.rubisco interacting	cit.8821.1.s1_x_at;	highly similar to ( 741)AT2G39730| Symbols: RCA | RCA (RUBISCO ACTIVASE) | chr2:16578252-16580423 REVERSEhighly similar to ( 723)RCA_ORYSA affx|C37_12064;	-1.42042
1.3.13	PS.calvin cyle.rubisco interacting	cit.7049.1.s1_at;	moderately similar to ( 475)AT1G14030| Symbols: | ribulose-1,5 bisphosphate carboxylase oxygenase large subunit N-methyltransferase, putative | chr1:4805490-4807437 REVERSEmoderately similar to ( 462)RBCMT_TOBAC affx|C37_09417;	-1.54403
1.3.3	PS.calvin cyle.phosphoglycerate kinase	cit.28750.1.s1_s_at;	moderately similar to ( 224)AT1G56190| Symbols: | phosphoglycerate kinase, putative | chr1:21032287-21034119 FORWARDmoderately similar to ( 229)PGKH_TOBAC affx|C37_40620;	-1.49232
1.3.3	PS.calvin cyle.phosphoglycerate kinase	cit.1478.1.s1_s_at;	highly similar to ( 736)AT1G56190| Symbols: | phosphoglycerate kinase, putative | chr1:21032287-21034119 FORWARDhighly similar to ( 734)PGKH_TOBAC affx|C37_01868;	-1.41676
1.3.3	PS.calvin cyle.phosphoglycerate kinase	cit.1478.1.s1_at;	highly similar to ( 736)AT1G56190| Symbols: | phosphoglycerate kinase, putative | chr1:21032287-21034119 FORWARDhighly similar to ( 734)PGKH_TOBAC affx|C37_01868;	-1.5641
1.3.4	PS.calvin cyle.GAP	cit.9259.1.s1_s_at;	moderately similar to ( 380)AT1G42970| Symbols: GAPB | GAPB (GLYCERALDEHYDE-3-PHOSPHATE DEHYDROGENASE B SUBUNIT); glyceraldehyde-3-phosphate dehydrogenase | chr1:16129992-16132024 FORWARDmoderately similar to ( 386)G3PB_PEA affx|C37_12596;	-1.41952
1.3.4	PS.calvin cyle.GAP	cit.9743.1.s1_s_at;	highly similar to ( 563)AT3G26650| Symbols: GAPA-1, GAPA | GAPA (GLYCERALDEHYDE 3-PHOSPHATE DEHYDROGENASE A SUBUNIT); glyceraldehyde-3-phosphate dehydrogenase | chr3:9796463-9798085 FORWARDhighly similar to ( 578)G3PA_PEA affx|C37_13202;	-1.81836
1.3.4	PS.calvin cyle.GAP	cit.10921.1.s1_s_at;	highly similar to ( 896)AT2G24270| Symbols: ALDH11A3 | ALDH11A3 (Aldehyde dehydrogenase 11A3); 3-chloroallyl aldehyde dehydrogenase/ glyceraldehyde-3-phosphate dehydrogenase (NADP+) | chr2:10334405-10336681 REVERSEhighly similar to ( 910)GAPN_NICPL affx|C37_14645;	-1.81348
1.3.4	PS.calvin cyle.GAP	cit.28388.1.s1_s_at;	moderately similar to ( 311)AT2G24270| Symbols: ALDH11A3 | ALDH11A3 (Aldehyde dehydrogenase 11A3); 3-chloroallyl aldehyde dehydrogenase/ glyceraldehyde-3-phosphate dehydrogenase (NADP+) | chr2:10334405-10336681 REVERSEmoderately similar to ( 324)GAPN_NICPL affx|C37_39170;	-1.39794
1.3.6	PS.calvin cyle.aldolase	cit.8874.1.s1_at;	highly similar to ( 677)AT4G38970| Symbols: | fructose-bisphosphate aldolase, putative | chr4:18163763-18165653 REVERSEhighly similar to ( 659)ALFC_ORYSA affx|C37_12134;	-1.54666
1.3.6	PS.calvin cyle.aldolase	cit.21653.1.s1_at;	weakly similar to ( 102)AT4G38970| Symbols: | fructose-bisphosphate aldolase, putative | chr4:18163763-18165653 REVERSEvery weakly similar to (98.2)ALFC_ORYSA affx|C37_25258;	-2.00057
1.3.6	PS.calvin cyle.aldolase	cit.37249.1.s1_s_at;	weakly similar to ( 159)AT4G38970| Symbols: | fructose-bisphosphate aldolase, putative | chr4:18163763-18165653 REVERSEweakly similar to ( 174)ALFC_ORYSA affx|C37_43124;	-1.55639
1.3.7	PS.calvin cyle.FBPase	cit.3351.1.s1_s_at;	highly similar to ( 609)AT3G54050| Symbols: | fructose-1,6-bisphosphatase, putative / D-fructose-1,6-bisphosphate 1-phosphohydrolase, putative / FBPase, putative | chr3:20027929-20029505 FORWARDhighly similar to ( 629)F16P1_PEA affx|C37_04237;	-2.21809
1.3.7	PS.calvin cyle.FBPase	cit.4984.1.s1_at;	moderately similar to ( 268)AT5G64380| Symbols: | fructose-1,6-bisphosphatase family protein | chr5:25758568-25760250 FORWARDweakly similar to ( 135)F16P1_SPIOL affx|C37_06325;	-1.30402
1.3.8	PS.calvin cyle.transketolase	cit.451.1.s1_s_at;	moderately similar to ( 318)AT2G45290| Symbols: | transketolase, putative | chr2:18679811-18682663 FORWARDmoderately similar to ( 326)TKTC_MAIZE affx|C37_00556;	-1.29917
1.3.9	PS.calvin cyle.seduheptulose bisphosphatase	cit.12965.1.s1_s_at;	highly similar to ( 634)AT3G55800| Symbols: SBPASE | SBPASE (SEDOHEPTULOSE-BISPHOSPHATASE); phosphoric ester hydrolase/ sedoheptulose-bisphosphatase | chr3:20720619-20722400 FORWARDhighly similar to ( 621)S17P_SPIOL affx|C37_17201;	-1.98344
1.3.8	PS.calvin cyle.transketolase	cit.451.1.s1_s_at;	moderately similar to ( 318)AT2G45290| Symbols: | transketolase, putative | chr2:18679811-18682663 FORWARDmoderately similar to ( 326)TKTC_MAIZE affx|C37_00556;	-1.29917
1.3.11	PS.calvin cyle.RPE	cit.2562.1.s1_at;	moderately similar to ( 473)AT5G61410| Symbols: EMB2728, RPE | RPE (EMBRYO DEFECTIVE 2728); ribulose-phosphate 3-epimerase | chr5:24701311-24703062 REVERSEmoderately similar to ( 479)RPE_SPIOL affx|C37_03239;	-1.2193
1.3.2	PS.calvin cyle.rubisco small subunit	cit.1818.1.s1_at;	weakly similar to ( 191)AT5G38410| Symbols: | ribulose bisphosphate carboxylase small chain 3B / RuBisCO small subunit 3B (RBCS-3B) (ATS3B) | chr5:15394731-15395536 REVERSEweakly similar to ( 195)RBS_PINTH affx|C37_02299;	-1.71449
1.3.2	PS.calvin cyle.rubisco small subunit	cit.8578.1.s1_at;	weakly similar to ( 135)AT1G67090| Symbols: RBCS1A | RBCS1A; ribulose-bisphosphate carboxylase | chr1:25052253-25052912 REVERSEweakly similar to ( 145)RBS_LACSA affx|C37_11744;	-3.69423
1.3.2	PS.calvin cyle.rubisco small subunit	cit.1816.1.s1_s_at;	weakly similar to ( 190)AT5G38410| Symbols: | ribulose bisphosphate carboxylase small chain 3B / RuBisCO small subunit 3B (RBCS-3B) (ATS3B) | chr5:15394731-15395536 REVERSEweakly similar to ( 195)RBS_MAIZE affx|C37_02297;	-1.87578
1.3.13	PS.calvin cyle.rubisco interacting	cit.8821.1.s1_s_at;	highly similar to ( 741)AT2G39730| Symbols: RCA | RCA (RUBISCO ACTIVASE) | chr2:16578252-16580423 REVERSEhighly similar to ( 723)RCA_ORYSA affx|C37_12064;	-1.44371
1.3.13	PS.calvin cyle.rubisco interacting	cit.20550.1.s1_at;	weakly similar to ( 109)AT2G39730| Symbols: RCA | RCA (RUBISCO ACTIVASE) | chr2:16578252-16580423 REVERSEweakly similar to ( 128)RCA_MALDO affx|C37_43534;	-3.78385
1.3.13	PS.calvin cyle.rubisco interacting	cit.8821.1.s1_x_at;	highly similar to ( 741)AT2G39730| Symbols: RCA | RCA (RUBISCO ACTIVASE) | chr2:16578252-16580423 REVERSEhighly similar to ( 723)RCA_ORYSA affx|C37_12064;	-1.42042
1.3.13	PS.calvin cyle.rubisco interacting	cit.7049.1.s1_at;	moderately similar to ( 475)AT1G14030| Symbols: | ribulose-1,5 bisphosphate carboxylase oxygenase large subunit N-methyltransferase, putative | chr1:4805490-4807437 REVERSEmoderately similar to ( 462)RBCMT_TOBAC affx|C37_09417;	-1.54403
1.2.1	PS.photorespiration.phosphoglycolate phosphatase	cit.24053.1.s1_at;	weakly similar to ( 104)AT5G36790| Symbols: | phosphoglycolate phosphatase, putative | chr5:14498459-14500960 REVERSE affx|C37_40447;	-1.59797
1.2.2	PS.photorespiration.glycolate oxydase	cit.2099.1.s1_at;	moderately similar to ( 353)AT3G14420| Symbols: | (S)-2-hydroxy-acid oxidase, peroxisomal, putative / glycolate oxidase, putative / short chain alpha-hydroxy acid oxidase, putative | chr3:4821906-4823906 FORWARDmoderately similar to ( 345)GOX_SPIOL affx|C37_02648;	-1.36675
1.2.2	PS.photorespiration.glycolate oxydase	cit.2098.1.s1_s_at;	highly similar to ( 607)AT3G14420| Symbols: | (S)-2-hydroxy-acid oxidase, peroxisomal, putative / glycolate oxidase, putative / short chain alpha-hydroxy acid oxidase, putative | chr3:4821906-4823906 FORWARDhighly similar to ( 600)GOX_SPIOL affx|C37_02647;	-1.74261
1.2.4	PS.photorespiration.glycine cleavage	cit.2838.1.s1_at;	moderately similar to ( 264)AT1G32470| Symbols: | glycine cleavage system H protein, mitochondrial, putative | chr1:11739459-11740226 REVERSEmoderately similar to ( 265)GCSH_FLAPR affx|C37_03590;	-1.74201
1.2.4	PS.photorespiration.glycine cleavage	cit.1835.1.s1_s_at;	moderately similar to ( 232)AT2G35120| Symbols: | glycine cleavage system H protein, mitochondrial, putative | chr2:14812992-14814353 REVERSEweakly similar to ( 195)GCSH_FLAPR affx|C37_02321;	1.59293
1.2.5	PS.photorespiration.serine hydroxymethyltransferase	cit.10148.1.s1_s_at;	moderately similar to ( 355)AT4G37930| Symbols: STM, SHMT1, SHM1 | SHM1 (SERINE HYDROXYMETHYLTRANSFERASE 1); glycine hydroxymethyltransferase/ poly(U) binding | chr4:17831885-17834736 REVERSEmoderately similar to ( 377)GLYN_FLAPR affx|C37_13684;	-1.87588
